# Supplementary material for: N -Linked glycosylation profiles of therapeutic induced senescent (TIS) triple negative breast cancer cells (TNBC) and their extracellular vesicle (EV) progeny
Source: Royal Society of Chemistry journal article supplement (doi:10.1039/d0mo00017e), 2020-12-16
Supplement: d0mo00017e9.xlsx [file d0mo00017e9.xlsx]

## Sheet: WCl CTRL MS
Sample Name: WCL control			2AB labelled N-glycans WCL control pool
			3µL water-9µL MeCN (10µL injected LCMS system), UPLC-FLD-QTOF YCA 219, negative mode
PeakUPLC	GUUPLC	tR (min)MS	Experimental mass (m/z)	Theoretical mass (m/z)	Error (ppm)	Ion	Assignment	Monosaccharide composition	Monoisotopic mass
1	4.11						NA
2	4.47						NA
3	4.68	4.43	1175.45	1175.45	6.29548	[M-H]-1	FM3	dHex1HexNAc2Hex3	1176.45
4	4.8						NA
6	5.23						NA
7	5.55						NA
8	5.75						NA
9	6.08	7.501	1353.51	1353.49	7.51831	[M-H]-1	M5	HexNAc2Hex5	1354.5
			676.233	676.244	16.4142	[M-2H]-2
10	6.31						NA
11	6.45						NA
12	6.54	9	899.84	899.837	3.66733	[M-2H]-2	A2BG1/A3G1	HexNAc5Hex4	1801.69
13	6.84	10.458	972.851	972.865	14.6988	[M-2H]-2	FA2BG1	dHex1HexNAc5Hex4	1947.75
14	6.98	10.53	1515.53	1515.55	9.43553	[M-H]-1	M6	HexNAc2Hex6	1516.56
			757.261	757.27	12.6771	[M-2H]-2		HexNAc2Hex6	1516.56
			879.323	879.323	0.227448	[M-2H]-2	A2G2	HexNAc4Hex5	1760.66
			972.851	972.865	14.6988	[M-2H]-2	FA3G1	dHex1HexNAc5Hex4	1947.75
15	7.26	11.13	980.864	980.863	0.815608	[M-2H]-2	A2BG2	HexNAc5Hex5	1963.74
16	7.41						NA
17	7.46						NA
18	7.63	12.72	960.334	960.35	15.8276	[M-2H]-2	M4A2G2	HexNAc4Hex6	1922.71
			1045.38	1045.38	5.45254	[M-2H]-2	A2BG1S1	HexNAc5Neu5Ac1Hex4	2092.78
			653.578	653.573	7.34425	[M-3H]-3	M4A2BG1	HexNAc5Hex5	1963.74
			1053.89	1053.89	1.4233	[M-2H]-2	FA2BG2	dHex1HexNAc5Hex5	2109.8
19	7.75						NA
20	7.86	13.48	1053.88	1053.89	14.0432	[M-2H]-2	FA3G2	dHex1HexNAc5Hex5	2109.8
			1677.58	1677.6	9.53743	[M-H]-1	M7	HexNAc2Hex7	1678.61
			838.294	838.297	3.34011	[M-2H]-2		HexNAc2Hex7	1678.61
21	7.97	13.77	1677.62	1677.6	10.4316	[M-H]-1	M7	HexNAc2Hex7	1678.61
			838.3	838.297	3.69798	[M-2H]-2		HexNAc2Hex7	1678.61
			1025.37	1025.38	11.2153	[M-2H]-2	FA2F1G2	dHex2HexNAc4Hex5	2052.78
22	8.09	13.862	898.782	898.793	12.4612	[M-2H]-2	M6A1	HexNAc3Hex6	1719.63
			1126.41	1126.41	0.710221	[M-2H]-2	A3G2S1	HexNAc5Neu5Ac1Hex5	2254.84
23	8.25	14.504	1024.85	1024.87	19.6122	[M-2H]-2	A2G2S1	HexNAc4Neu5Ac1Hex5	2051.76
			1098.39	1098.41	14.8396	[M-2H]-2	FA2F2G2	dHex3HexNAc4Hex5	2198.83
			1199.93	1199.95	15.4173	[M-2H]-2	FA2BF2G2	dHex3HexNAc5Hex5	2401.91
24	8.36	15.05	1199.42	1199.44	16.5077	[M-2H]-2	FA2BG2S1	dHex1HexNAc5Neu5Ac1Hex5	2400.89
25	8.48						NA
26	8.72	16.15	1126.4	1126.41	11.5411	[M-2H]-2	A2BG2S1	HexNAc5Neu5Ac1Hex5	2254.84
			1236.45	1236.46	5.01432	[M-2H]-2	FA3BG3	dHex1HexNAc6Hex6	2474.93
			1839.66	1839.65	2.06561	[M-H]-1	M8	HexNAc2Hex8	1840.66
			919.324	919.323	0.76143	[M-2H]-2		HexNAc2Hex8	1840.66
27	8.93	16.53	1097.89	1097.9	8.37964	[M-2H]-2	FA2G2S1	dHex1HexNAc4Neu5Ac1Hex5	2197.81
28	9.02						NA
29	9.11	17.82	1243.43	1243.45	15.7626	[M-2H]-2	FA2G2S2	dHex1HexNAc4Neu5Ac2Hex5	2488.91
			1199.44	1199.44	1.16721	[M-2H]-2	FA3G2S1	dHex1HexNAc5Neu5Ac1Hex5	2400.89
30	9.23	17.925	1170.43	1170.42	5.80989	[M-2H]-2	A2G2S2	HexNAc4Neu5Ac2Hex5	2342.85
			1308.97	1308.98	7.02839	[M-2H]-2	A3BG3S1	HexNAc6Neu5Ac1Hex6	2619.97
31	9.33		1243.44	1243.43	5.22748	[M-2H]-2	FA2G2S2	HexNAc2Hex12	2488.87
32	9.45	18.491	2001.7	2001.71	3.84672	[M-H]-1	M9	HexNAc2Hex9	2002.71
			1000.34	1000.35	4.59839	[M-2H]-2		HexNAc2Hex9	2002.71
33	9.53	19.141	806.593	806.596	3.47138	[M-3H]-3	A2G2S2 (sulphated GlcNAc)	HexNAc4Neu5Ac2Hex5	2374.84
			1243.46	1243.45	7.47921	[M-2H]-2	FA2G2S2	dHex1HexNAc4Neu5Ac2Hex5	2488.91
			1170.91	1170.93	16.4826	[M-2H]-2	FA2F2G2S1	dHex3HexNAc4Neu5Ac1Hex5	2489.93
			1280.97	1280.98	1.63937	[M-2H]-2	FA3F2G3	dHex3HexNAc5Hex6	2563.97
			1345.47	1345.5	17.6886	[M-2H]-2	FA3F2G2S1	dHex3HexNAc5Neu5Ac1Hex5	2693.01
			1382.5	1382.52	7.95651	[M-2H]-2	FA3BF2G3	dHex3HexNAc6Hex6	2767.05
34	9.68	19.504	1122.39	1122.4	12.6514	[M-2H]-2	M6A2G2	HexNAc4Hex8	2246.82
			1316.45	1316.48	19.9016	[M-2H]-2	FA2F1G2S2	dHex2HexNAc4Neu5Ac2Hex5	2634.97
35	9.81		1170.4	1170.42	18.1986	[M-2H]-2	A2G2S2	HexNAc4Neu5Ac2Hex5	2342.85
			1353.48	1353.49	9.23535	[M-2H]-2	A3G3F2S1	dHex2HexNAc5Neu5Ac1Hex6	2709
			1316.45	1316.48	19.9016	[M-2H]-2	FA2F1G2S2	dHex2HexNAc4Neu5Ac2Hex5	2634.97
			1344.96	1344.99	18.5875	[M-2H]-2	FA2BG2S2	dHex1HexNAc5Neu5Ac2Hex5	2691.99
			1455.03	1455.03	2.95526	[M-2H]-2	FA4F1G3S1	dHex2HexNAc6Neu5Ac1Hex6	2912.08
36	10.02	20.383	1243.93	1243.96	18.8913	[M-2H]-2	FA2F2G2S1	dHex3HexNAc4Neu5Ac1Hex5	2489.93
			1455.05	1455.03	13.1268	[M-2H]-2	FA4F1G3S1	dHex2HexNAc6Neu5Ac1Hex6	2912.08
			1419.03	1419.02	7.11757	[M-2H]-2	FA4BG4	dHex1HexNAc7Hex7	2840.06
			994.36	994.366	6.03399	[M-3H]-3	FA4BF1G4	dHex2HexNAc7Hex7	2986.12
37	10.12	20.814	1081.36	1081.38	16.1831	[M-2H]-2	M10	HexNAc2Hex10	2164.77
			1353.48	1353.49	9.23535	[M-2H]-2	A3G3F2S1	dHex2HexNAc5Neu5Ac1Hex6	2709
			1345.49	1345.5	6.54033	[M-2H]-2	FA2BF2G2S1	dHex3HexNAc5Neu5Ac1Hex5	2693.01
			1018.03	1018.03	5.69726	[M-3H]-3	FA3BG3S2	dHex1HexNAc6Neu5Ac2Hex6	3057.12
			1528.05	1528.06	5.95525	[M-2H]-2	FA3BF2G3S1	dHex3HexNAc6Neu5Ac1Hex6	3058.14
38	10.22	21.084	1353.98	1354.01	15.2141	[M-2H]-2	FA3F3G3	dHex3HexNAc5Hex6	2710.02
39	10.37		1426.03	1426.01	9.11632	[M-2H]-2	FA3G3S2	dHex1HexNAc5Neu5Ac2Hex6	2854.04
			1528.05	1528.06	5.95525	[M-2H]-2	FA3BF2G3S1	dHex3HexNAc6Neu5Ac1Hex6	3058.14
			1183.93	1183.94	11.3181	[M-2H]-2	*1A4BG2	HexNAc7Hex5	2369.9
			1345.99	1346	7.35515	[M-2H]-2	A4BG4	HexNAc7Hex7	2694
			1390.49	1390.51	14.7428	[M-2H]-2	A4F2G4	dHex2HexNAc6Hex7	2783.04
40	10.4	21.684	1352.97	1352.98	11.3083	[M-2H]-2	A3G3S2	HexNAc5Neu5Ac2Hex6	2707.98
			1426.5	1426.52	17.2447	[M-2H]-2	FA3F2G3S1	dHex3HexNAc5Neu5Ac1Hex6	2855.06
41	10.66	21.77	1353.5	1353.49	1.99484	[M-2H]-2	A3G3F2S1	dHex2HexNAc5Neu5Ac1Hex6	2709
			1426.5	1426.52	17.2447	[M-2H]-2	FA3F2G3S1	dHex3HexNAc5Neu5Ac1Hex6	2855.06
			1463.01	1463.03	18.3865	[M-2H]-2	FA4G3S1	dHex1HexNAc6Neu5Ac1Hex6	2766.03
42	10.81	22.512	998.678	998.686	7.30961	[M-3H]-3	A3G3S3	HexNAc5Neu5Ac3Hex6	2999.08
			1353.49	1353.49	3.62026	[M-2H]-2	A3F2G3S1	dHex2HexNAc5Neu5Ac1Hex6	2709
			1528.04	1528.06	16.3606	[M-2H]-2	FA3BF2G3S1	dHex3HexNAc6Neu5Ac1Hex6	3058.14
			1565.07	1565.08	4.5365	[M-2H]-2	FA4BF2G4	dHex3HexNAc7Hex7	3132.18
43	10.99	22.723	1426.54	1426.52	9.88417	[M-2H]-2	FA3F2G3S1	dHex3HexNAc5Neu5Ac1Hex6	2855.06
			1115.74	1115.74	2.95769	[M-3H]-3	A4BG4Lac1S1	HexNAc8Neu5Ac1Hex8	3350.23
44	11.11	23.525	1352.98	1352.98	0.147821	[M-2H]-2	*2A3G3S2	HexNAc5Neu5Ac2Hex6	2707.98
			1498.53	1498.53	3.60353	[M-2H]-2	A3G3S3	HexNAc5Neu5Ac3Hex6	2999.08
			1600.09	1600.07	12.7494	[M-2H]-2	A3BG3S3	HexNAc6Neu5Ac3Hex6	3202.16
			1571.54	1571.56	13.6807	[M-2H]-2	FA3G3S3	dHex1HexNAc5Neu5Ac3Hex6	3145.14
			998.685	998.686	0.801053	[M-3H]-3		dHex1HexNAc5Neu5Ac3Hex6	3145.14
			1535.58	1535.55	16.2808	[M-2H]-2	A4G4S2	HexNAc6Neu5Ac2Hex7	3073.12
45	11.26						NA
46	11.38	23.973	998.672	998.686	13.718	[M-3H]-3	A3G3S3	HexNAc5Neu5Ac3Hex6	2999.08
			1571.53	1571.56	18.7711	[M-2H]-2	FA3G3S3	dHex1HexNAc5Neu5Ac3Hex6	3145.14
			1609.56	1609.59	18.7626	[M-2H]-2	A4G4Lac2	HexNAc8Hex9	3221.19
			1115.38	1115.41	19.0962	[M-3H]-3	FA4F2G3S2	dHex3HexNAc6Neu5Ac2Hex6	3349.24
			1710.65	1710.63	11.7501	[M-2H]-2	FA4BF2G4S1	dHex3HexNAc7Neu5Ac1Hex7	3423.27
			1140.42	1140.42	2.71829	[M-3H]-3	FA4BF4G4	dHex5HexNAc7Hex7	3424.29
47	11.52	24.598	1468.02	1468.05	17.5744	[M-2H]-2	A4G4Lac3	HexNAc9Hex10	2738.11
			1498.53	1498.53	3.60353	[M-2H]-2	A3G3S3	HexNAc5Neu5Ac3Hex6	2999.08
			999.016	999.026	10.4101	[M-3H]-3	FA3F1G3S2	dHex2HexNAc5Neu5Ac2Hex6	3000.1
			1115.39	1115.41	12.9101	[M-3H]-3	FA4F2G3S2	dHex3HexNAc6Neu5Ac2Hex6	3349.24
48	11.95	25.814	1352.99	1352.98	5.46939	[M-2H]-2	*3A3G3S2	HexNAc5Neu5Ac2Hex6	2707.98
			1095.71	1095.72	6.75356	[M-3H]-3	A3G3S4	HexNAc5Neu5Ac4Hex6	3290.17
			999.016	999.026	10.4101	[M-3H]-3	FA3F1G3S2	dHex2HexNAc5Neu5Ac2Hex6	3000.1
			1237.09	1237.12	17.945	[M-3H]-3	FA4BF2G4S2	dHex3HexNAc7Neu5Ac2Hex7	3714.37
49	12.34						NA
50	12.49						NA
51	12.8						NA
52	12.98						NA
53	13.12						NA
54	13.61						NA
55	13.77						NA
56	14.21						NA
*1fragment of A4BG4
*2fragment of A3G3S3
*3fragment of A3G3S4
NA= not assigned

## Sheet: WCL Treated MS
Sample Name: WCL treated			2AB labelled N-glycans WCL treated pool
			3µL water-9µL MeCN (10µL injected LCMS system), UPLC-FLD-QTOF YCA 219, negative mode
PeakUPLC	GUUPLC	tR (min)MS	Experimental mass (m/z)	Theoretical mass (m/z)	Error (ppm)	Ion	Assignment	Monosaccharide composition	Monoisotopic mass
1	4.13	3.429	1029.39	1029.39	3.40007	[M-1H]-1	M3	HexNAc2Hex3	1030.4
2	4.53						NA
3	4.7	4.43	1175.45	1175.45	6.29548	[M-H]-1	FM3	dHex1HexNAc2Hex3	1176.45
4	4.82						NA
5	5.08						NA
6	5.25	5.989	717.28	717.27	13.3841	[M-2H]-2	A1B/A2	HexNAc4Hex3	1436.56
7	5.58						NA
8	5.78	6.952	790.291	790.299	10.6289	[M-2H]-2	FA1B	dHex1HexNAc4Hex3	1582.61
			1581.61	1581.61	0.442588	[M-H]-1	FA2
9	6.11	7.64	1353.49	1353.49	3.63799	[M-H]-1	M5	HexNAc2Hex5	1354.5
			676.243	676.244	0.739378	[M-2H]-2
			798.291	798.297	7.76653	[M-2H]-2	A1BG1/A2G1	HexNAc4Hex4	1598.61
10	6.34	7.898	798.291	798.297	7.76653	[M-2H]-2	A2G1	HexNAc4Hex4	1598.61
11	6.47	8.481	891.829	891.839	11.2128	[M-2H]-2	A2BF1/A3F1	dHex1HexNAc3Hex3	1785.69
12	6.58	9.292	899.821	899.837	16.892	[M-2H]-2	A2BG1/A3G1	HexNAc5Hex4	1801.69
			993.384	993.379	5.23466	[M-2H]-2	FA3B	dHex1HexNAc6Hex3	1988.77
13	6.86	9.773	871.332	871.326	7.23036	[M-2H]-2	A1BF1G1/FA2G1/A2F1G1	dHex1HexNAc4Hex4	1744.67
			972.851	972.865	14.6988	[M-2H]-2	FA2BG1	dHex1HexNAc5Hex4	1947.75
			993.397	993.379	18.12	[M-2H]-2	A3BF1/FA4	dHex1HexNAc6Hex3	1988.77
14	7	10.576	1515.54	1515.55	5.3446	[M-H]-1	M6	HexNAc2Hex6	1516.56
			757.266	757.27	5.28213	[M-2H]-2		HexNAc2Hex6	1516.56
			879.317	879.323	6.70971	[M-2H]-2	A2G2	HexNAc4Hex5	1760.66
15	7.28	11.02	980.845	980.863	18.759	[M-2H]-2	A2BG2	HexNAc5Hex5	1963.74
16	7.4						NA
17	7.48	12.1818	952.343	952.352	9.66029	[M-2H]-2	FA2G2	dHex1HexNAc4Hex5	1906.72
			858.821	858.81	13.2742	[M-2H]-2	M6A1	HexNAc3Hex6	1719.63
			952.343	952.352	9.66029	[M-2H]-2	FM5A2	dHex1HexNAc4Hex5	1906.72
18	7.64	12.848	915.342	915.334	8.95848	[M-2H]-2	FA1G1S1	dHex1HexNAc3Neu5Ac1Hex4	1832.68
			952.337	952.352	16.3805	[M-2H]-2	A2F1G2	dHex1HexNAc4Hex5	1906.72
			1053.88	1053.89	7.6858	[M-2H]-2	FA2BG2/FA3G2	dHex1HexNAc5Hex5	2109.8
			1045.91	1045.89	14.055	[M-2H]-2	FA2BF1G1/FA3F1G1	dHex2HexNAc5Hex4	2093.8
			653.572	653.573	0.612021	[M-3H]-3	A3G2	HexNAc5Hex5	1963.74
			1102.9	1102.92	16.2297	[M-2H]-2	A4BG1	HexNAc7Hex4	2207.85
19	7.77	12.93	1053.89	1053.89	1.4233	[M-2H]-2	FA2BG2	dHex1HexNAc5Hex5	2109.8
20	7.88	13.465	1677.61	1677.6	5.42441	[M-H]-1	M7	HexNAc2Hex7	1678.61
			838.288	838.297	10.4975	[M-2H]-2		HexNAc2Hex7	1678.61
			1118.41	1118.41	5.90122	[M-2H]-2	A3F1G1S1	dHex1HexNAc5Neu5Ac1Hex4	2238.84
			923.32	923.331	11.8051	[M-2H]-2	M4A1G1S1	HexNAc3Neu5Ac1Hex5	1848.68
21	7.98	13.69	1033.38	1033.36	19.935	[M-2H]-2	FM5A1BG1	dHex1HexNAc4Hex6	2068.77
22	8.11	14.504	1126.43	1126.41	12.9615	[M-2H]-2	A3G2S1	HexNAc5Neu5Ac1Hex5	2254.84
23	8.26	15.02	1097.89	1097.9	8.37964	[M-2H]-2	FA2G2S1	dHex1HexNAc4Neu5Ac1Hex5	2197.81
			1025.4	1025.38	14.4337	[M-2H]-2	FA2F1G2	dHex2HexNAc4Hex5	2052.78
			1061.88	1061.89	7.15705	[M-2H]-2	A3G3	HexNAc5Hex6	2125.79
24	8.37	15.534	1025.38	1025.38	1.65792	[M-2H]-2	A2F2G2	dHex2HexNAc4Hex5	2052.78
			1199.43	1199.44	4.75222	[M-2H]-2	FA2BG2S1	dHex1HexNAc5Neu5Ac1Hex5	2400.89
25	8.48	15.6	1024.85	1024.87	19.6122	[M-2H]-2	A2G2S1	HexNAc4Neu5Ac1Hex5	2051.76
			1126.92	1126.92	0	[M-2H]-2	A2BF2G2	dHex2HexNAc5Hex5	2255.86
			1163.43	1163.43	2.23477	[M-2H]-2	A3BG3	HexNAc6Hex6	2328.87
26	8.72	16.286	1199.95	1199.95	3.66682	[M-2H]-2	FA2BF2G2	dHex3HexNAc5Hex5	2401.91
			1098.39	1098.41	14.8396	[M-2H]-2	FA2F2G2	dHex3HexNAc4Hex5	2198.83
			1199.43	1199.44	10.5883	[M-2H]-2	FA2BG2S1/FA3G2S1	dHex1HexNAc5Neu5Ac1Hex5	2400.89
			1134.91	1134.92	3.17203	[M-2H]-2	A3F1G3	dHex1HexNAc5Hex6	2271.85
			1004.34	1004.36	12.844	[M-2H]-2	M5A1G1S1	HexNAc3Neu5Ac1Hex6	2010.73
			1236.45	1236.46	5.01432	[M-2H]-2	FA3BG3	dHex1HexNAc6Hex6	2474.93
			1839.63	1839.65	10.6542	[M-H]-1	M8	HexNAc2Hex8	1840.66
			919.324	919.323	0.76143	[M-2H]-2		HexNAc2Hex8	1840.66
27	8.91	17.18	1170.93	1170.93	1.62264	[M-2H]-2	FA2F1G2S1	dHex2HexNAc4Neu5Ac1Hex5	2343.87
			1098.41	1098.41	2.54914	[M-2H]-2	FA2F2G2	dHex3HexNAc4Hex5	2198.83
28	9.02	17.283	1243.45	1243.45	1.68885	[M-2H]-2	A2F1G2S2	dHex1HexNAc4Neu5Ac2Hex5	2488.91
			1207.43	1207.44	5.05202	[M-2H]-2	A3G3S1	HexNAc5Neu5Ac1Hex6	2416.89
			1199.95	1199.95	3.66682	[M-2H]-2	FA2BF2G2/FA3F2G2	dHex3HexNAc5Hex6	2401.91
29	9.11	17.94	1170.91	1170.93	16.4826	[M-2H]-2	FA2F1G2S1	dHex2HexNAc4Neu5Ac1Hex5	2343.87
			1345.49	1345.5	6.54033	[M-2H]-2	FA3F2G2S1	dHex3HexNAc5Neu5Ac1Hex5	2693.01
30	9.25		1199.96	1199.95	8.25035	[M-2H]-2	FA2BF2G2	dHex3HexNAc5Hex5	2401.91
31	9.34		1243.42	1243.43	6.3534	[M-2H]-2	FA2G2S2	HexNAc2Hex12	2488.87
			1272.44	1272.47	19.2539	[M-2H]-2	A3F2G2S1	dHex2HexNAc5Neu5Ac1Hex5	2546.95
			1345.99	1346	7.35515	[M-2H]-2	A3G2Lac2	HexNAc7Hex7	2694
32	9.46	18.508	1170.91	1170.93	16.4826	[M-2H]-2	FA2F1G2S1	dHex2HexNAc4Neu5Ac1Hex5	2343.87
			1207.43	1207.44	5.05202	[M-2H]-2	A3G3S1	HexNAc5Neu5Ac1Hex6	2416.89
			1280.46	1280.47	4.4515	[M-2H]-2	A3F1G3S1	dHex1HexNAc5Neu5Ac1Hex6	2562.95
			1280.97	1280.98	7.33815	[M-2H]-2	FA3F2G3	dHex3HexNAc5Hex6	2563.97
			1382.52	1382.52	3.03794	[M-2H]-2	FA3BF2G3	dHex3HexNAc6Hex6	2767.05
			2001.67	2001.71	17.585	[M-H]-1	M9	HexNAc2Hex9	2002.71
			1000.33	1000.35	17.5939	[M-2H]-2
33	9.54	19.209	1170.92	1170.93	10.4191	[M-2H]-2	FA2F1G2S1	dHex2HexNAc4Neu5Ac1Hex5	2343.87
			1344.96	1344.99	18.5875	[M-2H]-2	FA2BG2S2	dHex1HexNAc5Neu5Ac2Hex5	2691.99
			1272.96	1272.98	11.9405	[M-2H]-2	FA2BF3G2	dHex4HexNAc5Hex5	2547.97
			1280.46	1280.47	4.4515	[M-2H]-2	FA3G3S1	dHex1HexNAc5Neu5Ac1Hex6	2562.95
34	9.71						NA
35	9.81	19.724	1271.95	1271.96	3.45923	[M-2H]-2	A2BG2S2	HexNAc5Neu5Ac2Hex5	2545.93
36	10.03	20.451	1280.47	1280.47	7.02869	[M-2H]-2	A3F1G3S1	dHex1HexNAc5Neu5Ac1Hex6	2562.95
37	10.12	20.78	1317.48	1317.48	5.23725	[M-2H]-2	FA4G4	dHex1HexNAc6Hex7	2636.98
38	10.22	21.228	1308.95	1308.98	18.4113	[M-2H]-2	A4G3S1	HexNAc6Neu5Ac1Hex6	2649.97
39	10.35						NA
40	10.4						NA
41	10.65	21.6	1170.42	1170.42	0.256319	[M-2H]-2	A2G2S2	HexNAc4Neu5Ac2Hex5	2342.85
42	10.81		1352.98	1352.98	0.147821	[M-2H]-2	A3G3S2	HexNAc5Neu5Ac2Hex6	2707.98
			1426	1426.01	7.15281	[M-2H]-2	FA3G3S2	dHex1HexNAc5Neu5Ac2Hex6	2854.04
43	10.95	22.689	998.672	998.686	13.718	[M-3H]-3	A3G3S3	HexNAc5Neu5Ac3Hex6	2999.08
			1426.52	1426.52	0.981407	[M-2H]-2	A3F3G3S1	dHex3HexNAc5Neu5Ac1Hex6	2855.06
			1527.56	1527.55	2.74949	[M-2H]-2	FA3BG3S2	dHex1HexNAc6Neu5Ac2Hex6	3057.12
			1115.75	1115.74	9.05231	[M-3H]-3	A4BG4Lac1S1	HexNAc8Neu5Ac1Hex8	3350.23
44	11.09	23.593	999.353	999.366	13.4085	[M-3H]-3	FA2F3G2Lac1S1	dHex4HexNAc5Neu5Ac1Hex5	3001.12
			1498.53	1498.53	3.60353	[M-2H]-2	A3G3S3	HexNAc5Neu5Ac3Hex6	2999.08
			1426.03	1426.01	9.11632	[M-2H]-2	A3F1G3S2	dHex1HexNAc5Neu5Ac2Hex6	2854.04
			1499.04	1499.04	4.93648	[M-2H]-2	A3F2G2S2	dHex2HexNAc5Neu5Ac2Hex6	3000.1
45	11.25						NA
46	11.38	23.939	1609.61	1609.59	11.9285	[M-2H]-2	A4G4Lac2	HexNAc8Hex9	3221.19
47	11.51	24.699	1498.52	1498.53	8.94208	[M-2H]-2	A3G3S3	HexNAc5Neu5Ac3Hex6	2999.08
			998.685	998.686	0.801053	[M-3H]-3		HexNAc5Neu5Ac3Hex6	2999.08
			1572.08	1572.07	8.33295	[M-2H]-2	A3F3G3S2	dHex3HexNAc5Neu5Ac2Hex6	3146.16
			1468.05	1468.06	4.7682	[M-2H]-2	FA4BF4G1	dHex5HexNAc7Hex4	2938.14
48	11.93	25.882	1352.98	1352.98	0.147821	[M-2H]-2	*1A3G3S2	HexNAc5Neu5Ac2Hex6	2707.98
			1095.72	1095.72	5.74966	[M-3H]-3	A3G3S4	HexNAc5Neu5Ac4Hex6	3290.17
			1571.57	1571.56	7.06304	[M-2H]-2	FA3G3S3/A3F1G3S3	dHex1HexNAc5Neu5Ac3Hex6	3145.14
			1169.74	1169.75	8.12136	[M-3H]-3	A4G4Lac2S1	HexNAc8Neu5Ac1Hex9	3512.29
49	12.33	26.448	1096.05	1096.06	7.29889	[M-3H]-3	FA3F1G3S3	dHex2HexNAc5Neu5Ac3Hex6	3583.31
50	12.49						NA
51	12.78						NA
52	12.96						NA
53	13.18						NA
54	13.56						NA
55	13.71						NA
56	14.07						NA
*1fragment of A3G3S4
NA= not assigned

## Sheet: Membrane CTRL MS
Sample Name: Membrane control			2AB labelled N-glycans membrane control pool
			3µL water-9µL MeCN (10µL injected LCMS system), UPLC-FLD-QTOF YCA 219, negative mode
PeakUPLC	GUUPLC	tR (min)MS	Experimental mass (m/z)	Theoretical mass (m/z)	Error (ppm)	Ion	Assignment	Monosaccharide composition	Monoisotopic mass
1	4.09	3.446	1029.4	1029.39	9.81164	[M-1H]-1	M3	HexNAc2Hex3	1030.4
2	4.4						NA
3	4.48						NA
4	4.66	4.46	1175.43	1175.45	17.6103	[M-H]-1	FM3	dHex1HexNAc2Hex3	1176.45
5	4.78						NA
6	5.04						NA
7	5.22						NA
8	5.55						NA
9	5.75						NA
10	5.86						NA
11	5.92						NA
12	6.01	6.817					NA
13	6.1	7.8	1353.48	1353.49	9.25308	[M-H]-1	M5	HexNAc2Hex5	1354.5
			676.249	676.244	7.24591	[M-2H]-2
14	6.21	8.084	798.296	798.297	0.501067	[M-2H]-2	A1BG1	HexNAc4Hex4	1598.61
15	6.33	8.43	798.291	798.297	7.76653	[M-2H]-2	A2G1	HexNAc4Hex4	1598.61
16	6.48	8.582	871.326	871.326	0.344303	[M-2H]-2	FA1BG1	dHex1HexNAc4Hex4	1744.67
			891.854	891.839	16.2585	[M-2H]-2	A2BF1/A3F1	dHex1HexNAc3Hex3	1785.69
17	6.58	9.098	749.284	749.273	15.4817	[M-2H]-2	FM5	dHex1HexNAc2Hex5	1500.56
			899.821	899.837	16.892	[M-2H]-2	A2BG1/A3G1	HexNAc5Hex4	1801.69
			993.377	993.379	1.30867	[M-2H]-2	FA3B	dHex1HexNAc6Hex3	1988.77
18	6.66						NA
19	6.68						NA
20	6.73	9.325	871.314	871.326	13.5426	[M-2H]-2	FA2G1	dHex1HexNAc4Hex4	1744.67
			972.857	972.865	8.12034	[M-2H]-2	FA2BG1	dHex1HexNAc5Hex4	1947.75
21	6.87	10.407	871.32	871.326	6.65652	[M-2H]-2	A1BF1G1/A2F1G1	dHex1HexNAc4Hex4	1744.67
			993.377	993.379	1.30867	[M-2H]-2	A3BF1/FA4	dHex1HexNAc6Hex3	1988.77
22	7.01	10.474	1515.53	1515.55	9.43553	[M-H]-1	M6	HexNAc2Hex6	1516.56
			757.261	757.27	12.6771	[M-2H]-2		HexNAc2Hex6	1516.56
23	7.05		879.323	879.323	0.227448	[M-2H]-2	A2G2	HexNAc4Hex5	1760.66
24	7.29	11.12	944.366	944.355	11.86	[M-2H]-2	FA1BF1G1/FA2F1G1	dHex2HexNAc4Hex4	1890.72
			972.864	972.865	1.54184	[M-2H]-2	A3F1G1	dHex1HexNAc5Hex4	1947.75
			980.857	980.863	5.70926	[M-2H]-2	A2BG2	HexNAc5Hex5	1963.74
25	7.39						NA
26	7.49	12.079	952.337	952.352	16.3805	[M-2H]-2	FA2G2	dHex1HexNAc4Hex5	1906.72
			858.797	858.81	14.7879	[M-2H]-2	M6A1	HexNAc3Hex6	1719.63
27	7.65	12.764	915.336	915.334	2.29425	[M-2H]-2	FA1G1S1	dHex1HexNAc3Neu5Ac1Hex4	1832.68
			952.343	952.352	9.66029	[M-2H]-2	A2F1G2/FM5A2	dHex1HexNAc4Hex5	1906.72
			1053.89	1053.89	1.4233	[M-2H]-2	FA2BG2/FA3G2	dHex1HexNAc5Hex5	2109.8
			1045.9	1045.89	1.43418	[M-2H]-2	FA2BF1G1/FA3F1G1	dHex2HexNAc5Hex4	2093.8
			653.578	653.573	7.34425	[M-3H]-3	A3G2	HexNAc5Hex5	1963.74
			1102.92	1102.92	2.44806	[M-2H]-2	A4BG1	HexNAc7Hex4	2207.85
28	7.77	12.848	1053.88	1053.89	7.6858	[M-2H]-2	FA2BG2	dHex1HexNAc5Hex5	2109.8
29	7.88	13.397	1677.57	1677.6	19.6113	[M-H]-1	M7	HexNAc2Hex7	1678.61
			838.288	838.297	10.4975	[M-2H]-2		HexNAc2Hex7	1678.61
			1118.42	1118.41	6.43769	[M-2H]-2	A3F1G1S1	dHex1HexNAc5Neu5Ac1Hex4	2238.84
			923.32	923.331	11.8051	[M-2H]-2	M4A1G1S1	HexNAc3Neu5Ac1Hex5	1848.68
30	7.98	13.524	1146.93	1146.92	2.61569	[M-2H]-2	A4G1S1	HexNAc6Neu5Ac1Hex4	2295.86
31	8.05		1033.36	1033.36	7.16113	[M-2H]-2	FM5A2G1	dHex1HexNAc4Hex6	2068.77
32	8.13	13.591	1097.88	1097.9	14.4822	[M-2H]-2	FA2G2S1	dHex1HexNAc4Neu5Ac1Hex5	2197.81
			1025.38	1025.38	4.77871	[M-2H]-2	FA2F1G2	dHex2HexNAc4Hex5	2052.78
			1134.91	1134.92	9.33988	[M-2H]-2	FA3G3	dHex1HexNAc5Hex6	2271.85
33	8.25	15.07	1097.89	1097.9	8.37964	[M-2H]-2	FA2G2S1	dHex1HexNAc4Neu5Ac1Hex5	2197.81
			1061.89	1061.89	0.847546	[M-2H]-2	A3G3	HexNAc5Hex6	2125.79
34	8.37		1025.38	1025.38	1.65792	[M-2H]-2	A2F2G2	dHex2HexNAc4Hex5	2052.78
			1199.42	1199.44	16.5077	[M-2H]-2	FA2BG2S1	dHex1HexNAc5Neu5Ac1Hex5	2400.89
35	8.47						NA
36	8.57	15.5	1024.88	1024.87	12.4894	[M-2H]-2	A2G2S1	HexNAc4Neu5Ac1Hex5	2051.76
			1126.91	1126.92	12.2458	[M-2H]-2	A2BF2G2/A3F2G2	dHex2HexNAc5Hex5	2255.86
			1163.42	1163.43	8.33742	[M-2H]-2	A3BG3	HexNAc6Hex6	2328.87
			1212.45	1212.47	16.1654	[M-2H]-2	FA3BF3	dHex4HexNAc6Hex3	2426.95
37	8.72	16.235	1098.4	1098.41	8.73991	[M-2H]-2	FA2F2G2	dHex3HexNAc4Hex5	2198.83
			1199.95	1199.95	2.25009	[M-2H]-2	FA2BF2G2	dHex3HexNAc5Hex5	2401.91
			1199.43	1199.44	10.5883	[M-2H]-2	FA2BG2S1/FA3G2S1	dHex1HexNAc5Neu5Ac1Hex5	2400.89
			1191.43	1191.44	11.8344	[M-2H]-2	FA2BF1G1S1/FA3F1G1S1	dHex2HexNAc5Neu5Ac1Hex4	2384.9
			1134.9	1134.92	15.3315	[M-2H]-2	A3F1G3	dHex1HexNAc5Hex6	2271.85
			1004.36	1004.36	0.0995661	[M-2H]-2	M5A1G1S1	HexNAc3Neu5Ac1Hex6	2010.73
			1236.44	1236.46	16.6605	[M-2H]-2	FA3BG3	dHex1HexNAc6Hex6	2474.93
			1839.62	1839.65	17.0141	[M-H]-1	M8	HexNAc2Hex8	1840.66
			919.311	919.323	12.8355	[M-2H]-2		HexNAc2Hex8	1840.66
38	8.9	17.012	1170.92	1170.93	10.4191	[M-2H]-2	FA2F1G2S1	dHex2HexNAc4Neu5Ac1Hex5	2343.87
			1207.42	1207.44	11.0151	[M-2H]-2	A3G3S1	HexNAc5Neu5Ac1Hex6	2416.89
			988.696	988.694	1.92173	[M-3H]-3	FA4BG3S1	dHex1HexNAc7Neu5Ac1Hex6	2969.11
39	9	17.148	1243.44	1243.45	9.97227	[M-2H]-2	A2F1G2S2	dHex1HexNAc4Neu5Ac2Hex5	2488.91
			1199.95	1199.95	3.66682	[M-2H]-2	FA2BF2G2/FA3F2G2	dHex3HexNAc5Hex6	2401.91
			1207.44	1207.44	0.828201	[M-2H]-2	A3G3S1	HexNAc5Neu5Ac1Hex6	2416.89
			1248.98	1248.97	6.00493	[M-2H]-2	A4BF2G1	dHex2HexNAc7Hex4	2499.96
40	9.07		1170.94	1170.93	7.5154	[M-2H]-2	FA2F1G2S1	dHex2HexNAc4Neu5Ac1Hex5	2343.87
			1244.46	1244.46	5.62495	[M-2H]-2	A4G4	HexNAc6Hex7	2490.93
41	9.22	17.857	1170.4	1170.42	18.1986	[M-2H]-2	A2G2S2	HexNAc4Neu5Ac2Hex5	2342.85
			1199.93	1199.95	15.4173	[M-2H]-2	FA2BF2G2	dHex3HexNAc5Hex6	2401.91
			1308.97	1308.98	7.02839	[M-2H]-2	A3BG3S1	HexNAc6Neu5Ac1Hex6	2619.97
42	9.32		1243.41	1243.43	12.1438	[M-2H]-2	FA2G2S2	HexNAc2Hex12	2488.87
			1272.45	1272.47	13.517	[M-2H]-2	A3F2G2S1	dHex2HexNAc5Neu5Ac1Hex5	2546.95
			1345.5	1345.5	4.75661	[M-2H]-2	FA2F2G2S1	dHex3HexNAc5Neu5Ac1Hex5	2693.01
43	9.43	18.44	1207.42	1207.44	11.0151	[M-2H]-2	A3G3S1	HexNAc5Neu5Ac1Hex6	2416.89
			1178.93	1178.93	3.81703	[M-2H]-2	FM5A2G1S1	dHex1HexNAc4Neu5Ac1Hex6	2359.87
			1170.94	1170.93	13.579	[M-2H]-2	FA2F1G2S1	dHex2HexNAc4Neu5Ac1Hex5	2343.87
			1280.97	1280.98	7.33815	[M-2H]-2	FA3F2G3	dHex3HexNAc5Hex6	2563.97
			1382.49	1382.52	19.0233	[M-2H]-2	FA3BF2G3	dHex3HexNAc6Hex6	2767.05
			2001.7	2001.71	3.84672	[M-H]-1	M9	HexNAc2Hex9	2002.71
			1000.34	1000.35	4.59839	[M-2H]-2
44	9.5	18.626	1280.48	1280.47	12.7297	[M-2H]-2	FA3G3S1	dHex1HexNAc5Neu5Ac1Hex6	2562.95
			1170.94	1170.93	13.579	[M-2H]-2	FA2F1G2S1	dHex2HexNAc4Neu5Ac1Hex5	2343.87
			1344.99	1344.99	3.71751	[M-2H]-2	FA2BG2S2	dHex1HexNAc5Neu5Ac2Hex5	2691.99
			1271.97	1271.96	8.01913	[M-2H]-2	A3G2S2	HexNAc5Neu5Ac2Hex5	2545.93
45	9.58	19.18	1170.42	1170.42	0.256319	[M-2H]-2	A2G2S2	HexNAc4Neu5Ac2Hex5	2342.85
46	9.76		1271.97	1271.96	8.01913	[M-2H]-2	A2BG2S2	HexNAc5Neu5Ac2Hex5	2545.93
47	10	20.383	1280.46	1280.47	4.4515	[M-2H]-2	A3F1G3S1	dHex1HexNAc5Neu5Ac1Hex6	2562.95
			1346.01	1346	9.4354	[M-2H]-2	A4BG4	HexNAc7Hex7	2694
			1317.5	1317.48	11.7648	[M-2H]-2	FA4G4	dHex1HexNAc6Hex7	2636.98
			1308.99	1308.98	9.93142	[M-2H]-2	A4G3S1	HexNAc6Neu5Ac1Hex6	2649.97
			1243.44	1243.45	4.1015	[M-2H]-2	FA2G2S2/A2F1G2S2	dHex1HexNAc4Neu5Ac2Hex5	2488.91
48	10.16	20.746	1353.51	1353.49	7.53605	[M-2H]-2	A3F2G3S1	dHex2HexNAc5Neu5Ac1Hex6	2709
			1426	1426.01	12.5525	[M-2H]-2	FA3G3S2	dHex1HexNAc5Neu5Ac2Hex6	2854.04
49	10.28						NA
50	10.38	21.684	1352.98	1352.98	5.76503	[M-2H]-2	A3G3S2	HexNAc5Neu5Ac2Hex6	2707.98
51	10.6		1426.04	1426.01	19.9858	[M-2H]-2	FA3G3S2	dHex1HexNAc5Neu5Ac2Hex6	2854.04
52	10.77	22.191	998.692	998.686	5.7075	[M-3H]-3	A3G3S3	HexNAc5Neu5Ac3Hex6	2999.08
			1527.58	1527.55	14.664	[M-2H]-2	FA3BG3S2	dHex1HexNAc6Neu5Ac2Hex6	3057.12
53	10.94	22.841	1426.55	1426.52	15.352	[M-2H]-2	A3F3G3S1	dHex3HexNAc5Neu5Ac1Hex6	2855.06
			1115.74	1115.74	2.95769	[M-3H]-3	A4BG4Lac1S1	HexNAc8Neu5Ac1Hex8	3350.23
54	11.04		1426	1426.01	7.15281	[M-2H]-2	A3F1G3S2	dHex1HexNAc5Neu5Ac2Hex6	2854.04
			1499.03	1499.04	10.2732	[M-2H]-2	A3F2G2S2	dHex2HexNAc5Neu5Ac2Hex6	3000.1
			999.353	999.366	13.4085	[M-3H]-3	FA2F3G2Lac1S1	dHex4HexNAc5Neu5Ac1Hex5	3001.12
			1389.51	1389.51	0.71968	[M-2H]-2	FA2F2G2S2	dHex3HexNAc5Neu5Ac2Hex5	2781.03
			1498.56	1498.53	17.6172	[M-2H]-2	A3G3S3	HexNAc5Neu5Ac3Hex6	2999.08
55	11.32	24.075	1609.57	1609.59	8.5115	[M-2H]-2	A4G4Lac2	HexNAc8Hex9	3221.19
56	11.45	24.598	1498.56	1498.53	17.6172	[M-2H]-2	A3G3S3	HexNAc5Neu5Ac3Hex6	2999.08
			998.672	998.686	13.718	[M-3H]-3		HexNAc5Neu5Ac3Hex6	2999.08
			1468.05	1468.06	4.7682	[M-2H]-2	FA4BF4G1	dHex5HexNAc7Hex4	2938.14
			1572.05	1572.07	12.3404	[M-2H]-2	A3F3G3S2	dHex3HexNAc5Neu5Ac2Hex6	3146.16
57	11.78	25.181	1095.71	1095.72	6.75356	[M-3H]-3	A3G3S4	HexNAc5Neu5Ac4Hex6	3290.17
58	11.97	26.127	1571.54	1571.56	13.6807	[M-2H]-2	FA3G3S3/A3F1G3S3	dHex1HexNAc5Neu5Ac3Hex6	3145.14
			1169.74	1169.75	14.191	[M-3H]-3	A4G4Lac2S1	HexNAc8Neu5Ac1Hex9	3512.29
59	12.25		1096.06	1096.06	5.20046	[M-3H]-3	FA3F1G3S3	dHex2HexNAc5Neu5Ac3Hex6	3583.31
60	12.47						NA
61	12.7						NA
62	13.02						NA
63	13.49						NA
64	13.67						NA
NA= not assigned

## Sheet: Membrane Treated MS
Sample Name: Membrane treated			2AB labelled N-glycans membrane treated pool
			3µL water-9µL MeCN (10µL injected LCMS system), UPLC-FLD-QTOF YCA 219, negative mode
PeakUPLC	GUUPLC	tR (min)MS	Experimental mass (m/z)	Theoretical mass (m/z)	Error (ppm)	Ion	Assignment	Monosaccharide composition	Monoisotopic mass
1	4.1	3.37	1029.39	1029.39	3.40007	[M-1H]-1	M3	HexNAc2Hex3	1030.4
2	4.34						NA
3	4.44						NA
4	4.68	4.375	1175.43	1175.45	11.6551	[M-H]-1	FM3	dHex1HexNAc2Hex3	1176.45
5	4.81						NA
6	5.07						NA
7	5.24	5.87	717.269	717.27	1.95184	[M-2H]-2	A1B/A2	HexNAc4Hex3	1436.56
8	5.57	6.4					NA
9	5.79	6.7	790.308	790.299	11.2616	[M-2H]-2	FA1B/FA2	dHex1HexNAc4Hex3	1582.61
10	5.91						NA
11	5.96						NA
12	6.05	7.28	1581.62	1581.61	9.92662	[M-H]-1	A1BF1	dHex1HexNAc4Hex3	1582.61
			790.308	790.299	11.2616	[M-2H]-2
13	6.12	7.79	790.297	790.299	3.28989	[M-2H]-2	A2F1	dHex1HexNAc4Hex3	1582.61
			1353.48	1353.49	9.25308	[M-H]-1	M5	HexNAc2Hex5	1354.5
			676.243	676.244	0.739378	[M-2H]-2
14	6.23	7.98	798.285	798.297	14.9067	[M-2H]-2	A1BG1/A2G1	HexNAc4Hex4	1598.61
15	6.35	8.42	798.285	798.297	14.9067	[M-2H]-2	A2G1	HexNAc4Hex4	1598.61
16	6.5	9.19	871.332	871.326	7.23036	[M-2H]-2	FA1BG1/FA2G1	dHex1HexNAc4Hex4	1744.67
			891.835	891.839	4.37299	[M-2H]-2	A2BF1/A3F1	dHex1HexNAc3Hex3	1785.69
			749.268	749.273	6.94006	[M-2H]-2	FM5	dHex1HexNAc2Hex5	1500.56
17	6.61		899.852	899.837	17.3365	[M-2H]-2	A2BG1/A3G1	HexNAc5Hex4	1801.69
			993.397	993.379	18.12	[M-2H]-2	FA3B	dHex1HexNAc6Hex3	1988.77
18	6.71						NA
19	6.74						NA
20	6.78	9.54	871.32	871.326	6.65652	[M-2H]-2	FA2G1	dHex1HexNAc4Hex4	1744.67
			972.877	972.865	11.6152	[M-2H]-2	FA2BG1	dHex1HexNAc5Hex4	1947.75
21	6.89	10.15	871.332	871.326	7.23036	[M-2H]-2	A1BF1G1/A2F1G1	dHex1HexNAc4Hex4	1744.67
			993.364	993.379	14.3953	[M-2H]-2	A3BF1/FA4	dHex1HexNAc6Hex3	1988.77
22	7.03	10.54	1515.55	1515.55	1.05572	[M-H]-1	M6	HexNAc2Hex6	1516.56
			757.266	757.27	5.28213	[M-2H]-2		HexNAc2Hex6	1516.56
23	7.08		879.33	879.323	7.1646	[M-2H]-2	A2G2	HexNAc4Hex5	1760.66
			1094.9	1094.92	14.4303	[M-2H]-2	FA4B	dHex1HexNAc5Hex3	2191.85
24	7.32	11.61	944.347	944.355	8.15372	[M-2H]-2	FA1BF1G1/FA2F1G1	dHex2HexNAc4Hex4	1890.72
			980.851	980.863	12.2341	[M-2H]-2	A2BG2	HexNAc5Hex5	1963.74
			972.864	972.865	1.54184	[M-2H]-2	A3F1G1	HexNAc5Hex4	1947.75
25	7.4						NA
26	7.53	12.23	858.803	858.81	7.80149	[M-2H]-2	M6A1	HexNAc3Hex6	1719.63
			952.337	952.352	16.3805	[M-2H]-2	FM5A2	dHex1HexNAc4Hex5	1906.72
27	7.69	12.77	915.33	915.334	4.58849	[M-2H]-2	FA1G1S1	dHex1HexNAc3Neu5Ac1Hex4	1832.68
			952.368	952.352	16.9055	[M-2H]-2	A2F1G2	dHex1HexNAc4Hex5	1906.72
			1053.88	1053.89	14.0432	[M-2H]-2	FA2BG2/FA3G2	dHex1HexNAc5Hex5	2109.8
			1045.88	1045.89	17.5926	[M-2H]-2	FA2BF1G1/FA3F1G1	dHex2HexNAc5Hex4	2093.8
			1102.9	1102.92	9.97356	[M-2H]-2	A4BG1	HexNAc7Hex4	2207.85
			858.797	858.81	14.7879	[M-2H]-2	M5A1G1	HexNAc3Hex6	1719.63
28	7.81	12.81	653.567	653.573	8.72129	[M-3H]-3	A3G2	HexNAc5Hex5	1963.74
29	7.92	13.52	1677.61	1677.6	5.42441	[M-H]-1	M7	HexNAc2Hex7	1678.61
			838.282	838.297	17.5356	[M-2H]-2		HexNAc2Hex7	1678.61
			1118.43	1118.41	18.6872	[M-2H]-2	A3F1G1S1	dHex1HexNAc5Neu5Ac1Hex4	2238.84
			1308.96	1308.98	12.6817	[M-2H]-2	A2BG2Lac1S1	HexNAc6Neu5Ac1Hex6	2619.97
			923.333	923.331	1.73286	[M-2H]-2	M4A1G1S1	HexNAc3Neu5Ac1Hex5	1848.68
30	8.03	14	1146.91	1146.92	9.50368	[M-2H]-2	A4G1S1	HexNAc6Neu5Ac1Hex4	2295.86
31	8.1		1033.35	1033.36	8.90302	[M-2H]-2	FM5A2G1	dHex1HexNAc4Hex6	2068.77
32	8.15	14.48	1097.89	1097.9	8.37964	[M-2H]-2	FA2G2S1	dHex1HexNAc4Neu5Ac1Hex5	2197.81
			1025.39	1025.38	7.99703	[M-2H]-2	FA2F1G2	dHex2HexNAc4Hex5	2052.78
			1126.4	1126.41	11.5411	[M-2H]-2	A3G2S1	HexNAc5Neu5Ac1Hex5	2254.84
33	8.32	15.05	1024.86	1024.87	6.73256	[M-2H]-2	A2G2S1	HexNAc4Neu5Ac1Hex5	2051.76
			1097.89	1097.9	8.37964	[M-2H]-2	FA2G2S1	dHex1HexNAc4Neu5Ac1Hex5	2197.81
			1061.88	1061.89	13.3724	[M-2H]-2	A3G3	HexNAc5Hex6	2125.79
			1139.44	1139.44	0.965389	[M-2H]-2	A3BF3/FA4F2	dHex3HexNAc6Hex3	2280.89
34	8.44	15.15	1025.36	1025.38	17.652	[M-2H]-2	A2F2G2	dHex2HexNAc4Hex5	2052.78
			1199.42	1199.44	16.5077	[M-2H]-2	FA2BG2S1	dHex1HexNAc5Neu5Ac1Hex5	2400.89
35	8.53						NA
36	8.6	15.51	1024.85	1024.87	19.6122	[M-2H]-2	A2G2S1	HexNAc4Neu5Ac1Hex5	2051.76
			1126.9	1126.92	18.3686	[M-2H]-2	A2BF2G2	dHex2HexNAc5Hex5	2255.86
			1163.41	1163.43	14.2682	[M-2H]-2	A3BG3	HexNAc6Hex6	2328.87
			1212.46	1212.47	4.37126	[M-2H]-2	FA3BF3	dHex4HexNAc6Hex3	2426.95
37	8.78	16.26	1098.4	1098.41	8.73991	[M-2H]-2	FA2F2G2	dHex3HexNAc4Hex5	2198.83
			1126.9	1126.92	18.3686	[M-2H]-2	A3F2G2	dHex2HexNAc5Hex5	2255.86
			1097.9	1097.9	2.09491	[M-2H]-2	FA2G2S1/A2F1G2S1	dHex1HexNAc4Neu5Ac1Hex5	2197.81
			1199.93	1199.95	15.4173	[M-2H]-2	FA2BF2G2	dHex3HexNAc5Hex5	2401.91
			1199.43	1199.44	10.5883	[M-2H]-2	FA2BG2S1/FA3G2S1	dHex1HexNAc5Neu5Ac1Hex5	2400.89
			1191.42	1191.44	17.7936	[M-2H]-2	FA2BF1G1S1/FA3F1G1S1	dHex2HexNAc5Neu5Ac1Hex4	2384.9
			1134.91	1134.92	3.17203	[M-2H]-2	A3F1G3	dHex1HexNAc5Hex6	2271.85
			1004.35	1004.36	6.27267	[M-2H]-2	M5A1G1S1	HexNAc3Neu5Ac1Hex6	2010.73
			1236.44	1236.46	10.8374	[M-2H]-2	FA3BG3	dHex1HexNAc6Hex6	2474.93
			1839.66	1839.65	2.06561	[M-H]-1	M8	HexNAc2Hex8	1840.66
			919.324	919.323	0.76143	[M-2H]-2		HexNAc2Hex8	1840.66
38	8.98	17.21	1170.92	1170.93	4.44092	[M-2H]-2	FA2F1G2S1	dHex2HexNAc4Neu5Ac1Hex5	2343.87
			1207.42	1207.44	11.0151	[M-2H]-2	A3G3S1	HexNAc5Neu5Ac1Hex6	2416.89
			988.696	988.694	1.92173	[M-3H]-3	FA4BG3S1	dHex1HexNAc7Neu5Ac1Hex6	2969.11
39	9.09		1243.44	1243.45	9.97227	[M-2H]-2	A2F1G2S2	dHex1HexNAc4Neu5Ac2Hex5	2488.91
			1199.93	1199.95	15.4173	[M-2H]-2	FA2BF2G2/FA3F2G2	dHex3HexNAc5Hex6	2401.91
			1207.42	1207.44	11.0151	[M-2H]-2	A3G3S1	HexNAc5Neu5Ac1Hex6	2416.89
			1248.96	1248.97	11.3693	[M-2H]-2	A4BF2G1	dHex2HexNAc7Hex4	2499.96
40	9.19	17.64	1170.91	1170.93	16.4826	[M-2H]-2	FA2F1G2S1	dHex2HexNAc4Neu5Ac1Hex5	2343.87
			1345.49	1345.5	6.54033	[M-2H]-2	FA3F2G2S1	dHex3HexNAc5Neu5Ac1Hex5	2693.01
			1244.43	1244.46	17.5981	[M-2H]-2	A4G4	HexNAc6Hex7	2490.93
41	9.29		1170.4	1170.42	12.2179	[M-2H]-2	A2G2S2	HexNAc4Neu5Ac2Hex5	2342.85
			1199.96	1199.95	8.25035	[M-2H]-2	FA2BF2G2	dHex3HexNAc5Hex5	2401.91
			1308.97	1308.98	1.29872	[M-2H]-2	A3BG3S1	HexNAc6Neu5Ac1Hex6	2619.97
42	9.41		1243.42	1243.43	6.3534	[M-2H]-2	FA2G2S2	HexNAc2Hex12	2488.87
			1345.49	1345.5	6.54033	[M-2H]-2	FA2F2G2S1	dHex3HexNAc5Neu5Ac1Hex5	2693.01
			1272.48	1272.47	9.50908	[M-2H]-2	A3F2G2S1	dHex2HexNAc5Neu5Ac1Hex5	2546.95
43	9.51	18.57	1170.91	1170.93	16.4826	[M-2H]-2	FA2F1G2S1	dHex2HexNAc4Neu5Ac1Hex5	2343.87
			1207.45	1207.44	12.6715	[M-2H]-2	A3G3S1	HexNAc5Neu5Ac1Hex6	2416.89
			1280.95	1280.98	18.8138	[M-2H]-2	FA3F2G3	dHex3HexNAc5Hex6	2563.97
			1178.92	1178.93	2.2054	[M-2H]-2	FM5A2G1S1	dHex1HexNAc4Neu5Ac1Hex6	2359.87
			1382.53	1382.52	8.53516	[M-2H]-2	FA3BF2G3	dHex3HexNAc6Hex6	2767.05
			2001.72	2001.71	5.29548	[M-H]-1	M9	HexNAc2Hex9	2002.71
			1000.33	1000.35	17.5939	[M-2H]-2
44	9.61	19.2	1170.91	1170.93	16.4826	[M-2H]-2	FA2F1G2S1	dHex2HexNAc4Neu5Ac1Hex5	2343.87
			1344.98	1344.99	1.85875	[M-2H]-2	FA2BG2S2	dHex1HexNAc5Neu5Ac2Hex5	2691.99
			1272.99	1272.98	5.3418	[M-2H]-2	FA2BF3G2	dHex4HexNAc5Hex5	2547.97
			1271.95	1271.96	9.27703	[M-2H]-2	A3G2S2	HexNAc5Neu5Ac2Hex5	2545.93
			1280.45	1280.47	15.8536	[M-2H]-2	FA3G3S1	dHex1HexNAc5Neu5Ac1Hex6	2562.95
45	9.78	19.8	1170.43	1170.42	11.7907	[M-2H]-2	A2G2S2	HexNAc4Neu5Ac2Hex5	2342.85
			1314	1314.01	1.44596	[M-2H]-2	A4BF4	dHex4HexNAc7Hex3	2630.03
46	9.86		1170.43	1170.42	11.7907	[M-2H]-2	A2G2S2	HexNAc4Neu5Ac2Hex5	2342.85
			1271.94	1271.96	15.0162	[M-2H]-2	A2BG2S2	HexNAc5Neu5Ac2Hex5	2545.93
47	10.03	20.31	1243.44	1243.45	9.97227	[M-2H]-2	FA2G2S2/A2F1G2S2	dHex1HexNAc4Neu5Ac2Hex5	2488.91
			1280.46	1280.47	4.4515	[M-2H]-2	A3F1G3S1	dHex1HexNAc5Neu5Ac1Hex6	2562.95
			1308.97	1308.98	1.29872	[M-2H]-2	A4G3S1	HexNAc6Neu5Ac1Hex6	2649.97
			1317.5	1317.48	11.7648	[M-2H]-2	FA4G4	dHex1HexNAc6Hex7	2636.98
			1345.97	1346	18.4993	[M-2H]-2	A4BG4	HexNAc7Hex7	2694
48	10.18	20.96	1353.49	1353.49	3.62026	[M-2H]-2	A3F2G3S1	dHex2HexNAc5Neu5Ac1Hex6	2709
			1426.01	1426.01	1.61289	[M-2H]-2	FA3G3S2	dHex1HexNAc5Neu5Ac2Hex6	2854.04
49	10.38						NA
50	10.46	21.16	1353	1352.98	11.0127	[M-2H]-2	A3G3S2	HexNAc5Neu5Ac2Hex6	2707.98
51	10.68	22.52	1426	1426.01	12.5525	[M-2H]-2	FA3G3S2	dHex1HexNAc5Neu5Ac2Hex6	2854.04
52	10.83		998.698	998.686	12.1159	[M-3H]-3	A3G3S3	HexNAc5Neu5Ac3Hex6	2999.08
			1527.57	1527.55	7.92116	[M-2H]-2	FA3BG3S2	dHex1HexNAc6Neu5Ac2Hex6	3057.12
53	10.98		1426.52	1426.52	0.981407	[M-2H]-2	A3F3G3S1	dHex3HexNAc5Neu5Ac1Hex6	2855.06
			1115.75	1115.74	15.2366	[M-3H]-3	A4BG4Lac1S1	HexNAc8Neu5Ac1Hex8	3350.23
54	11.12	23.63	999.353	999.366	13.4085	[M-3H]-3	FA2F3G2Lac1S1	dHex4HexNAc5Neu5Ac1Hex5	3001.12
			1389.51	1389.51	6.11728	[M-2H]-2	FA2F2G2S2	dHex3HexNAc5Neu5Ac2Hex5	2781.03
			1426	1426.01	7.15281	[M-2H]-2	A3F1G3S2	dHex1HexNAc5Neu5Ac2Hex6	2854.04
			1498.53	1498.53	3.60353	[M-2H]-2	A3G3S3	HexNAc5Neu5Ac3Hex6	2999.08
55	11.39	23.99	1609.59	1609.59	1.67745	[M-2H]-2	A4G4Lac2	HexNAc8Hex9	3221.19
56	11.53	24.64	1498.52	1498.53	8.94208	[M-2H]-2	A3G3S3	HexNAc5Neu5Ac3Hex6	2999.08
			1572.06	1572.07	7.18797	[M-2H]-2	A3F3G3S2	dHex3HexNAc5Neu5Ac2Hex6	3146.16
			1468.05	1468.06	10.0813	[M-2H]-2	FA4BF4G1	dHex5HexNAc7Hex4	2938.14
57	11.85	25.14	1609.57	1609.59	8.5115	[M-2H]-2	A3G3Lac3	HexNAc8Hex9	3221.19
			1095.72	1095.72	5.74966	[M-3H]-3	A3G3S4	HexNAc5Neu5Ac4Hex6	3290.17
58	12.09	26.04	1571.56	1571.56	1.8453	[M-2H]-2	FA3G3S3/A3F1G3S3	dHex1HexNAc5Neu5Ac3Hex6	3145.14
			1096.06	1096.06	5.20046	[M-3H]-3	FA3F1G3S3	dHex2HexNAc5Neu5Ac3Hex6	3583.31
59	12.3	26.52	1169.74	1169.75	14.191	[M-3H]-3	A4G4Lac2S1	HexNAc8Neu5Ac1Hex9	3512.29
60	12.53						NA
61	12.74						NA
62	12.94						NA
63	13.48						NA
64	14.09						NA
NA= not assigned

## Sheet: EV CTRL MS
Sample Name: EV control			2AB labelled N-glycans EV control pool
			3µL water-9µL MeCN (10µL injected LCMS system), UPLC-FLD-QTOF YCA 219, negative mode
PeakUPLC	GUUPLC	tR (min)MS	Experimental mass (m/z)	Theoretical mass (m/z)	Error (ppm)	Ion	Assignment	Monosaccharide composition	Monoisotopic mass
1	4.12	3.43	1029.38	1029.39	9.42306	[M-1H]-1	M3	HexNAc2Hex3	1030.4
2	4.36						NA
3	4.44						NA
4	4.61						NA
5	4.69	4.39	1175.44	1175.45	5.61488	[M-H]-1	FM3	dHex1HexNAc2Hex3	1176.45
6	4.82						NA
7	5.01						NA
8	5.25	5.904	717.258	717.27	17.1483	[M-2H]-2	A1B	HexNAc4Hex3	1436.56
9	5.37		717.258	717.27	17.1483	[M-2H]-2	A2	HexNAc4Hex3	1436.56
10	5.46						NA
11	5.59						NA
12	5.8	7.17	790.308	790.299	11.2616	[M-2H]-2	FA1B/FA2	dHex1HexNAc4Hex3	1582.61
13	5.91						NA
14	6.05	7.3					NA
15	6.14	7.847	1353.48	1353.49	9.25308	[M-H]-1	M5	HexNAc2Hex5	1354.5
			676.233	676.244	16.4142	[M-2H]-2
16	6.23	7.932	798.302	798.297	6.7644	[M-2H]-2	A1BG1	HexNAc4Hex4	1598.61
17	6.37	8.067	798.302	798.297	6.7644	[M-2H]-2	A2G1	HexNAc4Hex4	1598.61
18	6.52	8.498	871.326	871.326	0.344303	[M-2H]-2	FA1BG1	dHex1HexNAc4Hex4	1744.67
19	6.64	9.19	899.846	899.837	10.4463	[M-2H]-2	A2BG1/A3G1	HexNAc5Hex4	1801.69
20	6.76	9.959	871.32	871.326	6.65652	[M-2H]-2	FA2G1	dHex1HexNAc4Hex4	1744.67
21	6.91	10.187	871.32	871.326	6.65652	[M-2H]-2	A1BF1G1/A2F1G1	dHex1HexNAc4Hex4	1744.67
22	7.04	10.458	1515.55	1515.55	1.05572	[M-H]-1	M6	HexNAc2Hex6	1516.56
			757.266	757.27	5.28213	[M-2H]-2		HexNAc2Hex6	1516.56
23	7.08		879.311	879.323	13.5331	[M-2H]-2	A2G2	HexNAc4Hex5	1760.66
24	7.26						NA
25	7.33	11.319	980.845	980.863	18.759	[M-2H]-2	A2BG2	HexNAc5Hex5	1963.74
			1094.93	1094.92	10.4117	[M-2H]-2	FA4B	dHex1HexNAc5Hex3	2191.85
26	7.4						NA
27	7.44						NA
28	7.54	12.113	952.337	952.352	16.3805	[M-2H]-2	FA2G2	dHex1HexNAc4Hex5	1906.72
			858.821	858.81	13.2742	[M-2H]-2	M6A1	HexNAc3Hex6	1719.63
29	7.7	12.764	952.356	952.352	3.57011	[M-2H]-2	A2F1G2/FM5A2	dHex1HexNAc4Hex5	1906.72
			1053.9	1053.89	4.93409	[M-2H]-2	FA2BG2/FA3G2	dHex1HexNAc5Hex5	2109.8
			653.578	653.573	7.34425	[M-3H]-3	A3G2	HexNAc5Hex5	1963.74
30	7.83	12.76	1053.9	1053.89	4.93409	[M-2H]-2	FA2BG2	dHex1HexNAc5Hex5	2109.8
31	7.93	13	1677.63	1677.6	15.4983	[M-H]-1	M7	HexNAc2Hex7	1678.61
			838.294	838.297	3.34011	[M-2H]-2		HexNAc2Hex7	1678.61
			923.333	923.331	1.73286	[M-2H]-2	M4A1G1S1	HexNAc3Neu5Ac1Hex5	1848.68
32	8.03	13.727	1033.36	1033.36	7.16113	[M-2H]-2	FM5A2G1	dHex1HexNAc4Hex6	2068.77
			1025.4	1025.38	14.4337	[M-2H]-2	FA2F1G2	dHex2HexNAc4Hex5	2052.78
33	8.32	14.876	1024.86	1024.87	6.73256	[M-2H]-2	A2G2S1	HexNAc4Neu5Ac1Hex5	2051.76
			1097.92	1097.9	16.3949	[M-2H]-2	FA2G2S1	dHex1HexNAc4Neu5Ac1Hex5	2197.81
			1061.88	1061.89	7.15705	[M-2H]-2	A3G3	HexNAc5Hex6	2125.79
34	8.44	15.15	1025.38	1025.38	4.77871	[M-2H]-2	A2F2G2	dHex2HexNAc4Hex5	2052.78
			1199.44	1199.44	1.16721	[M-2H]-2	FA2BG2S1	dHex1HexNAc5Neu5Ac1Hex5	2400.89
35	8.55	15.45	1024.89	1024.87	18.9292	[M-2H]-2	A2G2S1	HexNAc4Neu5Ac1Hex5	2051.76
			1199.95	1199.95	2.25009	[M-2H]-2	FA2BF2G2	dHex3HexNAc5Hex5	2401.91
36	8.78	16.202	1126.91	1126.92	6.12288	[M-2H]-2	A2BF2G2/A3F2G2	dHex2HexNAc5Hex5	2255.86
			1097.89	1097.9	8.37964	[M-2H]-2	FA2G2S1/A2F1G2S1	dHex1HexNAc4Neu5Ac1Hex5	2197.81
			1199.45	1199.44	7.17002	[M-2H]-2	FA2BG2S1/FA3G2S1	dHex1HexNAc5Neu5Ac1Hex5	2400.89
			1191.46	1191.44	11.9183	[M-2H]-2	FA2BF1G1S1/FA3F1G1S1	dHex2HexNAc5Neu5Ac1Hex4	2384.9
			1004.36	1004.36	0.0995661	[M-2H]-2	M5A1G1S1	HexNAc3Neu5Ac1Hex6	2010.73
			1236.47	1236.46	6.63185	[M-2H]-2	FA3BG3	dHex1HexNAc6Hex6	2474.93
			1839.67	1839.65	6.84912	[M-H]-1	M8	HexNAc2Hex8	1840.66
			919.311	919.323	12.8355	[M-2H]-2		HexNAc2Hex8	1840.66
37	8.98	16.785	1170.94	1170.93	7.5154	[M-2H]-2	FA2F1G2S1	dHex2HexNAc4Neu5Ac1Hex5	2343.87
			1098.41	1098.41	3.73267	[M-2H]-2	FA2F2G2	dHex3HexNAc4Hex5	2198.83
			988.69	988.694	4.6526	[M-3H]-3	FA4BG3S1	dHex1HexNAc7Neu5Ac1Hex6	2969.11
38	9.1	16.785	1243.45	1243.45	1.68885	[M-2H]-2	A2F1G2S2	dHex1HexNAc4Neu5Ac2Hex5	2488.91
			1199.96	1199.95	8.25035	[M-2H]-2	FA2BF2G2/FA3F2G2	dHex3HexNAc5Hex6	2401.91
39	9.19	17.925	1170.91	1170.93	16.4826	[M-2H]-2	FA2F1G2S1	dHex2HexNAc4Neu5Ac1Hex5	2343.87
			1345.5	1345.5	4.75661	[M-2H]-2	FA3F2G2S1	dHex3HexNAc5Neu5Ac1Hex5	2693.01
40	9.27	17.925	1170.4	1170.42	18.1986	[M-2H]-2	A2G2S2	HexNAc4Neu5Ac2Hex5	2342.85
41	9.42	18.474	1243.44	1243.43	5.22748	[M-2H]-2	FA2G2S2	HexNAc2Hex12	2488.87
42	9.52		1170.92	1170.93	10.4191	[M-2H]-2	FA2F1G2S1	dHex2HexNAc4Neu5Ac1Hex5	2343.87
			1207.42	1207.44	11.0151	[M-2H]-2	A3G3S1	HexNAc5Neu5Ac1Hex6	2416.89
			1280.47	1280.47	7.02869	[M-2H]-2	A3F1G3S1	dHex1HexNAc5Neu5Ac1Hex6	2562.95
			1382.5	1382.52	7.95651	[M-2H]-2	FA3BF2G3	dHex3HexNAc6Hex6	2767.05
43	9.63	19.175	2001.69	2001.71	8.4428	[M-H]-1	M9	HexNAc2Hex9	2002.71
			1000.36	1000.35	8.39707	[M-2H]-2
			1344.98	1344.99	7.43501	[M-2H]-2	FA2BG2S2	dHex1HexNAc5Neu5Ac2Hex5	2691.99
44	9.76	19.623	1170.4	1170.42	12.2179	[M-2H]-2	A2G2S2	HexNAc4Neu5Ac2Hex5	2342.85
			1314.03	1314.01	15.4489	[M-2H]-2	A4BF4	dHex4HexNAc7Hex3	2630.03
45	9.9	20.172	1170.4	1170.42	18.1986	[M-2H]-2	A2G2S2	HexNAc4Neu5Ac2Hex5	2342.85
			1271.98	1271.96	19.5761	[M-2H]-2	A2BG2S2	HexNAc5Neu5Ac2Hex5	2545.93
46	10.06	20.265	1243.44	1243.45	4.1015	[M-2H]-2	FA2G2S2/A2F1G2S2	dHex1HexNAc4Neu5Ac2Hex5	2488.91
			1308.97	1308.98	7.02839	[M-2H]-2	A4G3S1	HexNAc6Neu5Ac1Hex6	2649.97
			1345.98	1346	12.8529	[M-2H]-2	A4BG4	HexNAc7Hex7	2694
47	10.2	20.814	1353.48	1353.49	9.23535	[M-2H]-2	A3F2G3S1	dHex2HexNAc5Neu5Ac1Hex6	2709
			1426.01	1426.01	1.61289	[M-2H]-2	FA3G3S2	dHex1HexNAc5Neu5Ac2Hex6	2854.04
48	10.33	21.152	1352.98	1352.98	0.147821	[M-2H]-2	A3G3S2	HexNAc5Neu5Ac2Hex6	2707.98
49	10.47						NA
50	10.57						NA
51	10.75	22.444	1426	1426.01	7.15281	[M-2H]-2	FA3G3S2	dHex1HexNAc5Neu5Ac2Hex6	2854.04
52	10.88	22.495	1527.55	1527.55	2.5531	[M-2H]-2	FA3BG3S2	dHex1HexNAc6Neu5Ac2Hex6	3057.12
			998.685	998.686	0.801053	[M-3H]-3	A3G3S3	HexNAc5Neu5Ac3Hex6	2999.08
53	11.06	22.757	1426.51	1426.52	6.37914	[M-2H]-2	A3F3G3S1	dHex3HexNAc5Neu5Ac1Hex6	2855.06
			1115.74	1115.74	2.95769	[M-3H]-3	A4BG4Lac1S1	HexNAc8Neu5Ac1Hex8	3350.23
54	11.19	23.593	1426.03	1426.01	14.5861	[M-2H]-2	A3F1G3S2	dHex1HexNAc5Neu5Ac2Hex6	2854.04
			1499.04	1499.04	0.333546	[M-2H]-2	A3F2G2S2	dHex2HexNAc5Neu5Ac2Hex6	3000.1
			999.353	999.366	13.4085	[M-3H]-3	FA2F3G2Lac1S1	dHex4HexNAc5Neu5Ac1Hex5	3001.12
			1498.5	1498.53	19.4857	[M-2H]-2	A3G3S3	HexNAc5Neu5Ac3Hex6	2999.08
55	11.32	23.906	1609.61	1609.59	11.9285	[M-2H]-2	A4G4Lac2	HexNAc8Hex9	3221.19
56	11.48						NA
57	11.6	24.632	1498.53	1498.53	3.60353	[M-2H]-2	A3G3S3	HexNAc5Neu5Ac3Hex6	2999.08
			998.678	998.686	7.30961	[M-3H]-3		HexNAc5Neu5Ac3Hex6	2999.08
			1572.08	1572.07	3.24413	[M-2H]-2	A3F3G3S2	dHex3HexNAc5Neu5Ac2Hex6	3146.16
58	11.74	24.886	1609.58	1609.59	3.47915	[M-2H]-2	A3G3Lac3	HexNAc8Hex9	3221.19
59	12.02	25.849	1571.53	1571.56	18.7711	[M-2H]-2	FA3G3S3/A3F1G3S3	dHex1HexNAc5Neu5Ac3Hex6	3145.14
			1169.76	1169.75	3.84696	[M-3H]-3	A4G4Lac2S1	HexNAc8Neu5Ac1Hex9	3512.29
60	12.41	26.727	1096.04	1096.06	19.6158	[M-3H]-3	FA3F1G3S3	dHex2HexNAc5Neu5Ac3Hex6	3583.31
61	12.84						NA
62	13						NA
NA= not assigned

## Sheet: EV Treated MS
Sample Name: EV treated			2AB labelled N-glycans EV treated pool
			3µL water-9µL MeCN (10µL injected LCMS system), UPLC-FLD-QTOF YCA 219, negative mode
PeakUPLC	GUUPLC	tR (min)MS	Experimental mass (m/z)	Theoretical mass (m/z)	Error (ppm)	Ion	Assignment	Monosaccharide composition	Monoisotopic mass
1	4.13	3.48	1029.38	1029.39	9.42306	[M-1H]-1	M3	HexNAc2Hex3	1030.4
2	4.3						NA
3	4.46						NA
4	4.63						NA
5	4.72	4.409	1175.46	1175.45	12.3357	[M-H]-1	FM3	dHex1HexNAc2Hex3	1176.45
6	4.84						NA
7	5.09						NA
8	5.28						NA
9	5.36						NA
10	5.51						NA
11	5.61						NA
12	5.83	6.783	790.314	790.299	18.6005	[M-2H]-2	FA1B/FA2	dHex1HexNAc4Hex3	1582.61
13	5.91						NA
14	6.03						NA
15	6.16	7.881	1353.48	1353.49	9.25308	[M-H]-1	M5	HexNAc2Hex5	1354.5
			676.238	676.244	8.57679	[M-2H]-2
16	6.27	7.881					NA
17	6.38	8.565	798.291	798.297	7.76653	[M-2H]-2	A2G1	HexNAc4Hex4	1598.61
18	6.52	8.861	871.326	871.326	0.344303	[M-2H]-2	FA1BG1	dHex1HexNAc4Hex4	1744.67
19	6.65	9.131	899.827	899.837	10.0018	[M-2H]-2	A2BG1/A3G1	HexNAc5Hex4	1801.69
20	6.74	9.224	871.332	871.326	7.23036	[M-2H]-2	FA2G1	dHex1HexNAc4Hex4	1744.67
21	6.92	9.722	871.332	871.326	7.23036	[M-2H]-2	A1BF1G1/A2F1G1	dHex1HexNAc4Hex4	1744.67
22	7.07	10.508	1515.53	1515.55	9.43553	[M-H]-1	M6	HexNAc2Hex6	1516.56
			757.272	757.27	2.24491	[M-2H]-2		HexNAc2Hex6	1516.56
23	7.12	10.669	879.323	879.323	0.227448	[M-2H]-2	A2G2	HexNAc4Hex5	1760.66
24	7.29						NA
25	7.35	11.598	980.864	980.863	0.815608	[M-2H]-2	A2BG2	HexNAc5Hex5	1963.74
			972.857	972.865	8.12034	[M-2H]-2	A3F1G1	HexNAc5Hex4	1947.75
26	7.39						NA
27	7.45						NA
28	7.55	12.181	952.349	952.352	3.04509	[M-2H]-2	FA2G2	dHex1HexNAc4Hex5	1906.72
			858.809	858.81	0.698641	[M-2H]-2	M6A1	HexNAc3Hex6	1719.63
			952.362	952.352	10.2903	[M-2H]-2	FM5A2	dHex1HexNAc4Hex5	1906.72
29	7.72	12.882	915.342	915.334	8.95848	[M-2H]-2	FA1G1S1	dHex1HexNAc3Neu5Ac1Hex4	1832.68
			952.362	952.352	10.2903	[M-2H]-2	A2F1G2	dHex1HexNAc4Hex5	1906.72
			1053.88	1053.89	14.0432	[M-2H]-2	FA2BG2/FA3G2	dHex1HexNAc5Hex5	2109.8
			1045.9	1045.89	1.43418	[M-2H]-2	FA2BF1G1/FA3F1G1	dHex2HexNAc5Hex4	2093.8
			653.583	653.573	15.4535	[M-3H]-3	A3G2	HexNAc5Hex5	1963.74
			1102.93	1102.92	8.52286	[M-2H]-2	A4BG1	HexNAc7Hex4	2207.85
30	7.83	13.397	1053.88	1053.89	14.0432	[M-2H]-2	FA2BG2	dHex1HexNAc5Hex5	2109.8
31	7.95	13.482	1677.6	1677.6	0.417263	[M-H]-1	M7	HexNAc2Hex7	1678.61
			838.288	838.297	10.4975	[M-2H]-2		HexNAc2Hex7	1678.61
			923.333	923.331	1.73286	[M-2H]-2	M4A1G1S1	HexNAc3Neu5Ac1Hex5	1848.68
32	8.05	14.487	1025.4	1025.38	14.4337	[M-2H]-2	FA2F1G2	dHex2HexNAc4Hex5	2052.78
			1134.91	1134.92	3.17203	[M-2H]-2	FA3G3	dHex1HexNAc5Hex6	2271.85
			1097.88	1097.9	14.4822	[M-2H]-2	FA2G2S1	dHex1HexNAc4Neu5Ac1Hex5	2197.81
			1033.37	1033.36	13.5481	[M-2H]-2	FM5A2G1	dHex1HexNAc4Hex6	2068.77
33	8.34	15.137	1024.86	1024.87	6.73256	[M-2H]-2	A2G2S1	HexNAc4Neu5Ac1Hex5	2051.76
			1097.89	1097.9	8.37964	[M-2H]-2	FA2G2S1	dHex1HexNAc4Neu5Ac1Hex5	2197.81
34	8.46	15.517	1025.39	1025.38	7.99703	[M-2H]-2	A2F2G2	dHex2HexNAc4Hex5	2052.78
			1199.43	1199.44	10.5883	[M-2H]-2	FA2BG2S1	dHex1HexNAc5Neu5Ac1Hex5	2400.89
35	8.55		1024.88	1024.87	6.04954	[M-2H]-2	A2G2S1	HexNAc4Neu5Ac1Hex5	2051.76
36	8.8	16.252	1097.9	1097.9	2.09491	[M-2H]-2	FA2G2S1/A2F1G2S1	dHex1HexNAc4Neu5Ac1Hex5	2197.81
			1126.91	1126.92	6.12288	[M-2H]-2	A2BF2G2	dHex2HexNAc5Hex5	2255.86
			1126.91	1126.92	6.12288	[M-2H]-2	A3F2G2	dHex2HexNAc5Hex5	2255.86
			1098.4	1098.41	8.73991	[M-2H]-2	FA2F2G2	dHex3HexNAc4Hex5	2198.83
			1199.44	1199.44	1.16721	[M-2H]-2	FA2BG2S1/FA3G2S1	dHex1HexNAc5Neu5Ac1Hex5	2400.89
			1191.45	1191.44	7.46994	[M-2H]-2	FA2BF1G1S1/FA3F1G1S1	dHex2HexNAc5Neu5Ac1Hex4	2384.9
			1134.9	1134.92	15.3315	[M-2H]-2	A3F1G3	dHex1HexNAc5Hex6	2271.85
			1004.35	1004.36	6.27267	[M-2H]-2	M5A1G1S1	HexNAc3Neu5Ac1Hex6	2010.73
			1236.44	1236.46	16.6605	[M-2H]-2	FA3BG3	dHex1HexNAc6Hex6	2474.93
			1839.63	1839.65	12.2306	[M-H]-1	M8	HexNAc2Hex8	1840.66
			919.324	919.323	0.76143	[M-2H]-2		HexNAc2Hex8	1840.66
37	8.98	16.531	1170.92	1170.93	4.44092	[M-2H]-2	FA2F1G2S1	dHex2HexNAc4Neu5Ac1Hex5	2343.87
			1098.43	1098.41	16.0232	[M-2H]-2	FA2F2G2	dHex3HexNAc4Hex5	2198.83
			988.709	988.694	14.9692	[M-3H]-3	FA4BG3S1	dHex1HexNAc7Neu5Ac1Hex6	2969.11
38	9.11	17.376	1243.46	1243.45	13.2696	[M-2H]-2	A2F1G2S2	dHex1HexNAc4Neu5Ac2Hex5	2488.91
			1199.94	1199.95	9.58374	[M-2H]-2	FA2BF2G2/FA3F2G2	dHex3HexNAc5Hex6	2401.91
39	9.21	17.942	1170.92	1170.93	4.44092	[M-2H]-2	FA2F1G2S1	dHex2HexNAc4Neu5Ac1Hex5	2343.87
			1345.5	1345.5	4.75661	[M-2H]-2	FA3F2G2S1	dHex3HexNAc5Neu5Ac1Hex5	2693.01
40	9.31	18.026	1170.42	1170.42	0.256319	[M-2H]-2	A2G2S2	HexNAc4Neu5Ac2Hex5	2342.85
41	9.41		1243.44	1243.43	5.22748	[M-2H]-2	FA2G2S2	HexNAc2Hex12	2488.87
			1272.45	1272.47	13.517	[M-2H]-2	A3F2G2S1	dHex2HexNAc5Neu5Ac1Hex5	2546.95
42	9.53	18.541	1170.94	1170.93	13.579	[M-2H]-2	FA2F1G2S1	dHex2HexNAc4Neu5Ac1Hex5	2343.87
			1207.44	1207.44	0.828201	[M-2H]-2	A3G3S1	HexNAc5Neu5Ac1Hex6	2416.89
			1280.47	1280.47	1.24955	[M-2H]-2	A3F1G3S1	dHex1HexNAc5Neu5Ac1Hex6	2562.95
			1382.5	1382.52	7.95651	[M-2H]-2	FA3BF2G3	dHex3HexNAc6Hex6	2767.05
			2001.72	2001.71	5.29548	[M-H]-1	M9	HexNAc2Hex9	2002.71
			1000.36	1000.35	8.39707	[M-2H]-2
43	9.63	19.209	1170.92	1170.93	4.44092	[M-2H]-2	FA2F1G2S1	dHex2HexNAc4Neu5Ac1Hex5	2343.87
			1345	1344.99	9.36812	[M-2H]-2	FA2BG2S2	dHex1HexNAc5Neu5Ac2Hex5	2691.99
			1272.96	1272.98	17.6751	[M-2H]-2	FA2BF3G2	dHex4HexNAc5Hex5	2547.97
			1280.47	1280.47	7.02869	[M-2H]-2	FA3G3S1	dHex1HexNAc5Neu5Ac1Hex6	2562.95
44	9.81		1170.41	1170.42	6.15165	[M-2H]-2	A2G2S2	HexNAc4Neu5Ac2Hex5	2342.85
45	9.88	19.783	1170.41	1170.42	6.15165	[M-2H]-2	A2G2S2	HexNAc4Neu5Ac2Hex5	2342.85
			1271.95	1271.96	9.27703	[M-2H]-2	A2BG2S2	HexNAc5Neu5Ac2Hex5	2545.93
46	10.08	20.518	1243.44	1243.45	4.1015	[M-2H]-2	FA2G2S2/A2F1G2S2	dHex1HexNAc4Neu5Ac2Hex5	2488.91
			1280.47	1280.47	1.24955	[M-2H]-2	A3F1G3S1	dHex1HexNAc5Neu5Ac1Hex6	2562.95
			1345.98	1346	12.8529	[M-2H]-2	A4BG4	HexNAc7Hex7	2694
47	10.21		1353.48	1353.49	9.23535	[M-2H]-2	A3F2G3S1	dHex2HexNAc5Neu5Ac1Hex6	2709
			1426.03	1426.01	9.11632	[M-2H]-2	FA3G3S2	dHex1HexNAc5Neu5Ac2Hex6	2854.04
48	10.33						NA
49	10.43	21.414	1352.97	1352.98	11.3083	[M-2H]-2	A3G3S2	HexNAc5Neu5Ac2Hex6	2707.98
50	10.61						NA
51	10.76	22.512	1426	1426.01	7.15281	[M-2H]-2	FA3G3S2	dHex1HexNAc5Neu5Ac2Hex6	2854.04
52	10.87	22.63	998.672	998.686	13.718	[M-3H]-3	A3G3S3	HexNAc5Neu5Ac3Hex6	2999.08
			1527.53	1527.55	13.0274	[M-2H]-2	FA3BG3S2	dHex1HexNAc6Neu5Ac2Hex6	3057.12
53	10.98	22.689	1426.51	1426.52	11.847	[M-2H]-2	A3F3G3S1	dHex3HexNAc5Neu5Ac1Hex6	2855.06
54	11.19	23.61	999.359	999.366	6.90438	[M-3H]-3	FA2F3G2Lac1S1	dHex4HexNAc5Neu5Ac1Hex5	3001.12
			1498.52	1498.53	8.94208	[M-2H]-2	A3G3S3	HexNAc5Neu5Ac3Hex6	2999.08
			1499.02	1499.04	15.5433	[M-2H]-2	A3F2G2S2	dHex2HexNAc5Neu5Ac2Hex6	3000.1
			1115.73	1115.74	3.22657	[M-3H]-3	A4BG4Lac1S1	HexNAc8Neu5Ac1Hex8	3350.23
55	11.33						NA
56	11.47						NA
57	11.6	24.666	1498.53	1498.53	3.60353	[M-2H]-2	A3G3S3	HexNAc5Neu5Ac3Hex6	2999.08
			998.672	998.686	13.718	[M-3H]-3		HexNAc5Neu5Ac3Hex6	2999.08
			1572.08	1572.07	8.33295	[M-2H]-2	A3F3G3S2	dHex3HexNAc5Neu5Ac2Hex6	3146.16
58	11.76	24.767	1095.72	1095.72	0.456322	[M-3H]-3	A3G3S4	HexNAc5Neu5Ac4Hex6	3290.17
59	12.01	25.815	1571.54	1571.56	13.6807	[M-2H]-2	FA3G3S3/A3F1G3S3	dHex1HexNAc5Neu5Ac3Hex6	3145.14
			1169.75	1169.75	2.22269	[M-3H]-3	A4G4Lac2S1	HexNAc8Neu5Ac1Hex9	3512.29
60	12.39	26.558	1096.06	1096.06	1.09483	[M-3H]-3	FA3F1G3S3	dHex2HexNAc5Neu5Ac3Hex6	3583.31
61	12.83						NA
62	13.01						NA
NA= not assigned

## Sheet: Cytoplasm CTRL MS
Sample Name: Cytoplasm control			2AB labelled N-glycans cytoplasm control pool
			3µL water-9µL MeCN (10µL injected LCMS system), UPLC-FLD-QTOF YCA 219, negative mode
PeakUPLC	GUUPLC	tR (min)MS	Experimental mass (m/z)	Theoretical mass (m/z)	Error (ppm)	Ion	Assignment	Monosaccharide composition	Monoisotopic mass
1	4.13	3.446	1029.39	1029.39	3.01149	[M-1H]-1	M3	HexNAc2Hex3	1030.4
2	4.25						NA
3	4.41						NA
4	4.71	4.477	1175.43	1175.45	11.6551	[M-H]-1	FM3	dHex1HexNAc2Hex3	1176.45
5	4.84						NA
6	5.09						NA
7	5.28						NA
8	5.6						NA
9	5.82	6.724	790.297	790.299	3.28989	[M-2H]-2	FA1B/FA2	dHex1HexNAc4Hex3	1582.61
10	6.15	7.813	1353.48	1353.49	9.25308	[M-H]-1	M5	HexNAc2Hex5	1354.5
			676.249	676.244	7.24591	[M-2H]-2
			798.291	798.297	7.76653	[M-2H]-2	A1BG1	HexNAc4Hex4	1598.61
11	6.38	8.464	798.296	798.297	0.501067	[M-2H]-2	A2G1	HexNAc4Hex4	1598.61
12	6.53	8.844	871.32	871.326	6.65652	[M-2H]-2	FA1BG1	dHex1HexNAc4Hex4	1744.67
			891.829	891.839	11.2128	[M-2H]-2	A2BF1/A3F1	dHex1HexNAc3Hex3	1785.69
13	6.64	9.081	899.821	899.837	16.892	[M-2H]-2	A2BG1/A3G1	HexNAc5Hex4	1801.69
			993.364	993.379	14.3953	[M-2H]-2	FA3B	dHex1HexNAc6Hex3	1988.77
14	6.71	9.672	871.338	871.326	14.2312	[M-2H]-2	FA2G1	dHex1HexNAc4Hex4	1744.67
15	6.92	10.356	871.338	871.326	14.2312	[M-2H]-2	A1BF1G1/A2F1G1	dHex1HexNAc4Hex4	1744.67
			993.371	993.379	7.85199	[M-2H]-2	A3BF1/FA4	dHex1HexNAc6Hex3	1988.77
16	7.06	10.542	1515.52	1515.55	19.9268	[M-H]-1	M6	HexNAc2Hex6	1516.56
			757.266	757.27	5.28213	[M-2H]-2		HexNAc2Hex6	1516.56
17	7.11	10.576	879.33	879.323	7.1646	[M-2H]-2	A2G2	HexNAc4Hex5	1760.66
18	7.34	11.04	1094.9	1094.92	14.4303	[M-2H]-2	FA4B	dHex1HexNAc5Hex3	2191.85
			980.864	980.863	0.815608	[M-2H]-2	A2BG2	HexNAc5Hex5	1963.74
			972.851	972.865	14.6988	[M-2H]-2	A3F1G1	HexNAc5Hex4	1947.75
19	7.46						NA
20	7.55	11.851	952.343	952.352	9.66029	[M-2H]-2	FA2G2/FM5A2	dHex1HexNAc4Hex5	1906.72
			858.809	858.81	0.698641	[M-2H]-2	M6A1	HexNAc3Hex6	1719.63
21	7.71	12.78	915.33	915.334	4.58849	[M-2H]-2	FA1G1S1	dHex1HexNAc3Neu5Ac1Hex4	1832.68
			952.362	952.352	10.2903	[M-2H]-2	A2F1G2	dHex1HexNAc4Hex5	1906.72
			1053.88	1053.89	14.0432	[M-2H]-2	FA2BG2/FA3G2	dHex1HexNAc5Hex5	2109.8
			1045.9	1045.89	1.43418	[M-2H]-2	FA2BF1G1/FA3F1G1	dHex2HexNAc5Hex4	2093.8
			653.578	653.573	7.34425	[M-3H]-3	A3G2	HexNAc5Hex5	1963.74
			1102.92	1102.92	2.44806	[M-2H]-2	A4BG1	HexNAc7Hex4	2207.85
			858.815	858.81	6.17133	[M-2H]-2	M5A1G1	HexNAc3Hex6	1719.63
22	7.83	12.848	1053.88	1053.89	14.0432	[M-2H]-2	FA2BG2	dHex1HexNAc5Hex5	2109.8
23	7.94	13.482	1677.6	1677.6	0.417263	[M-H]-1	M7	HexNAc2Hex7	1678.61
			838.282	838.297	17.5356	[M-2H]-2		HexNAc2Hex7	1678.61
			1118.41	1118.41	0.35765	[M-2H]-2	A3F1G1S1	dHex1HexNAc5Neu5Ac1Hex4	2238.84
			923.339	923.331	8.44767	[M-2H]-2	M4A1G1S1	HexNAc3Neu5Ac1Hex5	1848.68
24	8.06	13.845	1097.89	1097.9	8.37964	[M-2H]-2	FA2G2S1	dHex1HexNAc4Neu5Ac1Hex5	2197.81
			1025.38	1025.38	4.77871	[M-2H]-2	FA2F1G2	dHex2HexNAc4Hex5	2052.78
			1126.42	1126.41	6.7471	[M-2H]-2	A3G2S1	HexNAc5Neu5Ac1Hex5	2254.84
			1134.93	1134.92	8.89932	[M-2H]-2	FA3G3	dHex1HexNAc5Hex6	2271.85
			1146.91	1146.92	9.50368	[M-2H]-2	A4G1S1	HexNAc6Neu5Ac1Hex4	2295.86
25	8.33	15.07	1024.88	1024.87	6.04954	[M-2H]-2	A2G2S1	HexNAc4Neu5Ac1Hex5	2051.76
			1097.9	1097.9	4.09873	[M-2H]-2	FA2G2S1	dHex1HexNAc4Neu5Ac1Hex5	2197.81
			1061.88	1061.89	7.15705	[M-2H]-2	A3G3	HexNAc5Hex6	2125.79
26	8.45		1025.38	1025.38	4.77871	[M-2H]-2	A2F2G2	dHex2HexNAc4Hex5	2052.78
			1199.43	1199.44	10.5883	[M-2H]-2	FA2BG2S1	dHex1HexNAc5Neu5Ac1Hex5	2400.89
27	8.54	15.45	1024.86	1024.87	13.1724	[M-2H]-2	A2G2S1	HexNAc4Neu5Ac1Hex5	2051.76
			1126.93	1126.92	6.12288	[M-2H]-2	A2BF2G2	dHex2HexNAc5Hex5	2255.86
			1163.43	1163.43	3.69597	[M-2H]-2	A3BG3	HexNAc6Hex6	2328.87
28	8.79	16.252	1097.9	1097.9	2.09491	[M-2H]-2	FA2G2S1/A2F1G2S1	dHex1HexNAc4Neu5Ac1Hex5	2197.81
			1098.41	1098.41	3.73267	[M-2H]-2	FA2F2G2	dHex3HexNAc4Hex5	2198.83
			1126.42	1126.41	6.7471	[M-2H]-2	A2BG2S1	HexNAc5Neu5Ac1Hex5	2254.84
			1199.96	1199.95	8.25035	[M-2H]-2	FA2BF2G2	dHex3HexNAc5Hex5	2401.91
			1199.43	1199.44	10.5883	[M-2H]-2	FA2BG2S1/FA3G2S1	dHex1HexNAc5Neu5Ac1Hex5	2400.89
			1191.44	1191.44	0	[M-2H]-2	FA2BF1G1S1/FA3F1G1S1	dHex2HexNAc5Neu5Ac1Hex4	2384.9
			1126.93	1126.92	6.12288	[M-2H]-2	A3F2G2	dHex2HexNAc5Hex5	2255.86
			1134.92	1134.92	2.81959	[M-2H]-2	A3F1G3	dHex1HexNAc5Hex6	2271.85
			1004.34	1004.36	12.844	[M-2H]-2	M5A1G1S1	HexNAc3Neu5Ac1Hex6	2010.73
			1236.46	1236.46	0.808762	[M-2H]-2	FA3BG3	dHex1HexNAc6Hex6	2474.93
			1839.65	1839.65	2.7179	[M-H]-1	M8	HexNAc2Hex8	1840.66
			919.311	919.323	12.8355	[M-2H]-2		HexNAc2Hex8	1840.66
29	8.98	17.08	1170.93	1170.93	1.62264	[M-2H]-2	FA2F1G2S1	dHex2HexNAc4Neu5Ac1Hex5	2343.87
			1098.43	1098.41	16.0232	[M-2H]-2	FA2F2G2	dHex3HexNAc4Hex5	2198.83
			1207.44	1207.44	0.828201	[M-2H]-2	A3G3S1	HexNAc5Neu5Ac1Hex6	2416.89
30	9.17	17.629	1243.46	1243.45	7.47921	[M-2H]-2	A2F1G2S2	dHex1HexNAc4Neu5Ac2Hex5	2488.91
			1199.95	1199.95	3.66682	[M-2H]-2	FA2BF2G2/FA3F2G2	dHex3HexNAc5Hex6	2401.91
			1207.42	1207.44	11.0151	[M-2H]-2	A3G3S1	HexNAc5Neu5Ac1Hex6	2416.89
31	9.28	17.857	1170.92	1170.93	4.44092	[M-2H]-2	FA2F1G2S1	dHex2HexNAc4Neu5Ac1Hex5	2343.87
			1345.5	1345.5	0.891863	[M-2H]-2	FA3F2G2S1	dHex3HexNAc5Neu5Ac1Hex5	2693.01
			1244.44	1244.46	11.8124	[M-2H]-2	A4G4	HexNAc6Hex7	2490.93
32	9.4	17.857	1170.43	1170.42	5.80989	[M-2H]-2	A2G2S2	HexNAc4Neu5Ac2Hex5	2342.85
			1243.44	1243.43	5.22748	[M-2H]-2	FA2G2S2	HexNAc2Hex12	2488.87
			1345.5	1345.5	0.891863	[M-2H]-2	FA2F2G2S1	dHex3HexNAc4Neu5Ac1Hex5	2693.01
			1199.95	1199.95	2.25009	[M-2H]-2	FA2BF2G2	dHex3HexNAc5Hex5	2401.91
			1272.45	1272.47	13.517	[M-2H]-2	A3F2G2S1	dHex2HexNAc5Neu5Ac1Hex5	2546.95
			1308.95	1308.98	18.4113	[M-2H]-2	A3BG3S1	HexNAc6Neu5Ac1Hex6	2619.97
			1345.99	1346	7.35515	[M-2H]-2	A3G2Lac2	HexNAc7Hex7	2694
33	9.5	18.525	1170.92	1170.93	10.4191	[M-2H]-2	FA2F1G2S1	dHex2HexNAc4Neu5Ac1Hex5	2343.87
			1207.42	1207.44	11.0151	[M-2H]-2	A3G3S1	HexNAc5Neu5Ac1Hex6	2416.89
			1280.46	1280.47	4.4515	[M-2H]-2	A3F1G3S1	dHex1HexNAc5Neu5Ac1Hex6	2562.95
			1280.97	1280.98	7.33815	[M-2H]-2	FA3F2G3	dHex3HexNAc5Hex6	2563.97
			1382.5	1382.52	7.95651	[M-2H]-2	FA3BF2G3	dHex3HexNAc6Hex6	2767.05
			2001.68	2001.71	12.9889	[M-H]-1	M9	HexNAc2Hex9	2002.71
			1000.33	1000.35	17.5939	[M-2H]-2
34	9.59	19.158	1170.92	1170.93	10.4191	[M-2H]-2	FA2F1G2S1	dHex2HexNAc4Neu5Ac1Hex5	2343.87
			1344.96	1344.99	18.5875	[M-2H]-2	FA2BG2S2	dHex1HexNAc5Neu5Ac2Hex5	2691.99
			1280.45	1280.47	10.1526	[M-2H]-2	FA3G3S1	dHex1HexNAc5Neu5Ac1Hex6	2562.95
35	9.85	19.783	1170.41	1170.42	6.15165	[M-2H]-2	A2G2S2	HexNAc4Neu5Ac2Hex5	2342.85
36	10.01	20.315	1170.44	1170.42	17.8569	[M-2H]-2	A2G2S2	HexNAc4Neu5Ac2Hex5	2342.85
37	10.15	20.315	1243.45	1243.45	1.68885	[M-2H]-2	FA2G2S2/A2F1G2S2	dHex1HexNAc4Neu5Ac2Hex5	2488.91
			1280.47	1280.47	1.24955	[M-2H]-2	A3F1G3S1	dHex1HexNAc5Neu5Ac1Hex6	2562.95
			1345.98	1346	12.8529	[M-2H]-2	A4BG4	HexNAc7Hex7	2694
38	10.67	21.346	1170.42	1170.42	0.256319	[M-2H]-2	A2G2S2	HexNAc4Neu5Ac2Hex5	2342.85
			1353.47	1353.49	14.7766	[M-2H]-2	A3F2G3S1/A3G3S2	dHex2HexNAc5Neu5Ac1Hex6	2709
			1352.99	1352.98	5.46939	[M-2H]-2		HexNAc5Neu5Ac2Hex6	2707.98
			1426.01	1426.01	1.61289	[M-2H]-2	FA3G3S2	dHex1HexNAc5Neu5Ac2Hex6	2854.04
39	10.82	22.63	998.672	998.686	13.718	[M-3H]-3	A3G3S3	HexNAc5Neu5Ac3Hex6	2999.08
			1426.53	1426.52	4.48643	[M-2H]-2	A3F3G3S1	dHex3HexNAc5Neu5Ac1Hex6	2855.06
			1527.55	1527.55	2.5531	[M-2H]-2	FA3BG3S2	dHex1HexNAc6Neu5Ac2Hex6	3057.12
			1115.73	1115.74	9.41082	[M-3H]-3	A4BG4Lac1S1	HexNAc8Neu5Ac1Hex8	3350.23
40	11.1	23.593	1498.54	1498.53	6.94012	[M-2H]-2	A3G3S3	HexNAc5Neu5Ac3Hex6	2999.08
			999.359	999.366	6.90438	[M-3H]-3	FA2F3G2Lac1S1	dHex4HexNAc5Neu5Ac1Hex5	3001.12
			1426.04	1426.01	19.9858	[M-2H]-2	A3F1G3S2	dHex1HexNAc5Neu5Ac2Hex6	2854.04
			1499.04	1499.04	0.333546	[M-2H]-2	A3F2G2S2	dHex2HexNAc5Neu5Ac2Hex6	3000.1
41	11.38	24.058	1609.57	1609.59	8.5115	[M-2H]-2	A4G4Lac2	HexNAc8Hex9	3221.19
			1571.53	1571.56	18.77	[M-2H]-2	FA3G3S3	dHex1HexNAc5Neu5Ac3Hex6	3145.14
			1115.38	1115.41	19.1	[M-3H]-3	FA4F2G3S2	dHex3HexNAc6Neu5Ac2Hex6	3349.24
			1710.65	1710.63	11.75	[M-2H]-2	FA4BF2G4S1	dHex3HexNAc7Neu5Ac1Hex7	3423.27
			1140.42	1140.42	2.72	[M-3H]-3	FA4BF4G4	dHex5HexNAc7Hex7	3424.29
42	11.51	24.666	1498.53	1498.53	3.60353	[M-2H]-2	A3G3S3	HexNAc5Neu5Ac3Hex6	2999.08
			998.678	998.686	7.30961	[M-3H]-3
			1572.06	1572.07	7.18797	[M-2H]-2	A3F3G3S2	dHex3HexNAc5Neu5Ac2Hex6	3146.16
			999.009	999.026	16.9165	[M-3H]-3	FA3F1G3S2	dHex2HexNAc5Neu5Ac2Hex6	3000.1
			1140.42	1140.42	2.71829	[M-3H]-3	FA4BF4G4	dHex5HexNAc7Hex7	3424.29
			1711.13	1711.14	3.85708	[M-2H]-2		dHex5HexNAc7Hex7	3424.29
			1468.04	1468.06	15.3945	[M-2H]-2	*1FA4BF4G1	dHex5HexNAc7Hex4	2938.14
43	12.07	25.967	1609.57	1609.59	13.606	[M-2H]-2	A3G3Lac3	HexNAc8Hex9	3221.19
			1095.73	1095.72	11.8644	[M-3H]-3	A3G3S4	HexNAc5Neu5Ac4Hex6	3290.17
			1571.54	1571.56	13.6807	[M-2H]-2	FA3G3S3/A3F1G3S3	dHex1HexNAc5Neu5Ac3Hex6	3145.14
			1169.76	1169.75	3.84696	[M-3H]-3	A4G4Lac2S1	HexNAc8Neu5Ac1Hex9	3512.29
44	12.28	26.347	1096.06	1096.06	1.09483	[M-3H]-3	FA3F1G3S3	dHex2HexNAc5Neu5Ac3Hex6	3583.31
45	12.46						NA
46	12.73						NA
47	13.05						NA
*1fragment of FA4BF4G4
NA= not assigned

## Sheet: Cytoplasm Treated MS
Sample Name: Cytoplasm treated			2AB labelled N-glycans cytoplasm treated pool
			3µL water-9µL MeCN (10µL injected LCMS system), UPLC-FLD-QTOF YCA 219, negative mode
PeakUPLC	GUUPLC	tR (min)MS	Experimental mass (m/z)	Theoretical mass (m/z)	Error (ppm)	Ion	Assignment	Monosaccharide composition	Monoisotopic mass
1	4.15	3.429	1029.39	1029.39	3.01149	[M-1H]-1	M3	HexNAc2Hex3	1030.4
2	4.26						NA
3	4.39						NA
4	4.73	4.443	1175.47	1175.45	18.2058	[M-H]-1	FM3	dHex1HexNAc2Hex3	1176.45
5	4.86						NA
6	5.04						NA
7	5.3	5.592	717.258	717.27	17.1483	[M-2H]-2	A1B/A2	HexNAc4Hex3	1436.56
8	5.62						NA
9	5.83	7.121	790.285	790.299	17.8413	[M-2H]-2	FA1B/FA2	dHex1HexNAc4Hex3	1582.61
10	6.17	7.763	798.296	798.297	0.501067	[M-2H]-2	A1BG1	HexNAc4Hex4	1598.61
			790.297	790.299	3.28989	[M-2H]-2	A1BF1/A2F1	dHex1HexNAc4Hex3	1582.61
			1353.51	1353.49	7.51831	[M-H]-1	M5	HexNAc2Hex5	1354.5
			676.243	676.244	0.739378	[M-2H]-2
11	6.4	8.464	798.291	798.297	7.76653	[M-2H]-2	A2G1	HexNAc4Hex4	1598.61
12	6.54	8.532	871.332	871.326	7.23036	[M-2H]-2	FA1BG1	dHex1HexNAc4Hex4	1744.67
			891.823	891.839	18.0526	[M-2H]-2	A2BF1/A3F1	dHex1HexNAc3Hex3	1785.69
13	6.66	9.19	899.84	899.837	3.66733	[M-2H]-2	A2BG1/A3G1	HexNAc5Hex4	1801.69
14	6.73		972.87	972.865	5.03667	[M-2H]-2	FA2BG1	dHex1HexNAc5Hex4	1947.75
15	6.94	10.424	993.397	993.379	18.12	[M-2H]-2	A3BF1/FA4	dHex1HexNAc6Hex3	1988.77
16	7.08	10.542	1515.55	1515.55	1.05572	[M-H]-1	M6	HexNAc2Hex6	1516.56
			757.272	757.27	2.24491	[M-2H]-2		HexNAc2Hex6	1516.56
17	7.13		879.311	879.323	13.5331	[M-2H]-2	A2G2	HexNAc4Hex5	1760.66
18	7.32						NA
19	7.36	11.598	944.366	944.355	11.5423	[M-2H]-2	FA1BF1G1/FA2F1G1	dHex2HexNAc4Hex4	1890.72
			980.864	980.863	0.815608	[M-2H]-2	A2BG2	HexNAc5Hex5	1963.74
20	7.48						NA
21	7.56	12.147	952.356	952.352	3.57011	[M-2H]-2	FA2G2/FM5A2	dHex1HexNAc4Hex5	1906.72
			858.797	858.81	14.7879	[M-2H]-2	M6A1	HexNAc3Hex6	1719.63
22	7.73	12.831	952.349	952.352	3.04509	[M-2H]-2	A2F1G2	dHex1HexNAc4Hex5	1906.72
			1053.89	1053.89	1.4233	[M-2H]-2	FA2BG2/FA3G2	dHex1HexNAc5Hex5	2109.8
			1045.9	1045.89	1.43418	[M-2H]-2	FA2BF1G1/FA3F1G1	dHex2HexNAc5Hex4	2093.8
			653.572	653.573	0.612021	[M-3H]-3	A3G2	HexNAc5Hex5	1963.74
			1102.9	1102.92	9.97356	[M-2H]-2	A4BG1	HexNAc7Hex4	2207.85
23	7.84	12.865	1053.89	1053.89	1.4233	[M-2H]-2	FA2BG2	dHex1HexNAc5Hex5	2109.8
24	7.96	13.397	1677.61	1677.6	5.42441	[M-H]-1	M7	HexNAc2Hex7	1678.61
			838.282	838.297	17.5356	[M-2H]-2		HexNAc2Hex7	1678.61
			1118.43	1118.41	18.6872	[M-2H]-2	A3F1G1S1	dHex1HexNAc5Neu5Ac1Hex4	2238.84
			923.32	923.331	11.8051	[M-2H]-2	M4A1G1S1	HexNAc3Neu5Ac1Hex5	1848.68
25	8.06	13.499	1146.93	1146.92	2.61569	[M-2H]-2	A4G1S1	HexNAc6Neu5Ac1Hex4	2295.86
			1033.35	1033.36	5.61277	[M-2H]-2	FM5A2G1	dHex1HexNAc4Hex6	2068.77
26	8.13	14.411	1025.38	1025.38	1.65792	[M-2H]-2	FA2F1G2	dHex2HexNAc4Hex5	2052.78
			1097.9	1097.9	4.09873	[M-2H]-2	FA2G2S1	dHex1HexNAc4Neu5Ac1Hex5	2197.81
			1126.41	1126.41	0.710221	[M-2H]-2	A3G2S1	HexNAc5Neu5Ac1Hex5	2254.84
27	8.35	15.053	1024.85	1024.87	19.6122	[M-2H]-2	A2G2S1	HexNAc4Neu5Ac1Hex5	2051.76
			1097.92	1097.9	16.3949	[M-2H]-2	FA2G2S1	dHex1HexNAc4Neu5Ac1Hex5	2197.81
			1061.9	1061.89	11.8656	[M-2H]-2	A3G3	HexNAc5Hex6	2125.79
28	8.47		1025.38	1025.38	1.65792	[M-2H]-2	A2F2G2	dHex2HexNAc4Hex5	2052.78
29	8.57	15.45	1024.86	1024.87	6.73256	[M-2H]-2	A2G2S1	HexNAc4Neu5Ac1Hex5	2051.76
			1126.94	1126.92	18.2799	[M-2H]-2	A2BF2G2/A3F2G2	dHex2HexNAc5Hex5	2255.86
30	8.81	16.269	1097.89	1097.9	8.37964	[M-2H]-2	FA2G2S1/A2F1G2S1	dHex1HexNAc4Neu5Ac1Hex5	2197.81
			1199.94	1199.95	9.58374	[M-2H]-2	FA2BF2G2	dHex3HexNAc5Hex5	2401.91
			1098.41	1098.41	3.73267	[M-2H]-2	FA2F2G2	dHex3HexNAc4Hex5	2198.83
			1199.46	1199.44	19.0089	[M-2H]-2	FA2BG2S1/FA3G2S1	dHex1HexNAc5Neu5Ac1Hex5	2400.89
			1191.45	1191.44	5.95916	[M-2H]-2	FA2BF1G1S1/FA3F1G1S1	dHex2HexNAc5Neu5Ac1Hex4	2384.9
			1134.91	1134.92	9.33988	[M-2H]-2	A3F1G3	dHex1HexNAc5Hex6	2271.85
			1004.36	1004.36	6.67093	[M-2H]-2	M5A1G1S1	HexNAc3Neu5Ac1Hex6	2010.73
			1236.45	1236.46	5.01432	[M-2H]-2	FA3BG3	dHex1HexNAc6Hex6	2474.93
			1839.62	1839.65	17.0141	[M-H]-1	M8	HexNAc2Hex8	1840.66
			919.317	919.323	6.09144	[M-2H]-2		HexNAc2Hex8	1840.66
31	9.01	17.165	1170.92	1170.93	10.4191	[M-2H]-2	FA2F1G2S1	dHex2HexNAc4Neu5Ac1Hex5	2343.87
			1098.41	1098.41	3.73267	[M-2H]-2	FA2F2G2	dHex3HexNAc4Hex5	2198.83
			1207.45	1207.44	6.79124	[M-2H]-2	A3G3S1	HexNAc5Neu5Ac1Hex6	2416.89
			988.683	988.694	11.1258	[M-3H]-3	FA4BG3S1	dHex1HexNAc7Neu5Ac1Hex6	2969.11
32	9.14	17.781	1243.44	1243.45	4.1015	[M-2H]-2	A2F1G2S2	dHex1HexNAc4Neu5Ac2Hex5	2488.91
			1199.94	1199.95	9.58374	[M-2H]-2	FA2BF2G2/FA3F2G2	dHex3HexNAc5Hex6	2401.91
			1207.45	1207.44	6.79124	[M-2H]-2	A3G3S1	HexNAc5Neu5Ac1Hex6	2416.89
33	9.21		1170.92	1170.93	10.4191	[M-2H]-2	FA2F1G2S1	dHex2HexNAc4Neu5Ac1Hex5	2343.87
			1345.49	1345.5	6.54033	[M-2H]-2	FA3F2G2S1	dHex3HexNAc5Neu5Ac1Hex5	2693.01
			1244.46	1244.46	5.62495	[M-2H]-2	A4G4	HexNAc6Hex7	2490.93
34	9.32		1199.94	1199.95	9.58374	[M-2H]-2	FA2BF2G2	dHex3HexNAc5Hex5	2401.91
			1308.97	1308.98	7.02839	[M-2H]-2	A3BG3S1	HexNAc6Neu5Ac1Hex6	2619.97
			1170.43	1170.42	11.7907	[M-2H]-2	A2G2S2	HexNAc4Neu5Ac2Hex5	2342.85
35	9.43		1272.47	1272.47	3.7722	[M-2H]-2	A3F2G2S1	dHex2HexNAc5Neu5Ac1Hex5	2546.95
			1345.49	1345.5	6.54033	[M-2H]-2	FA2F2G2S1	dHex3HexNAc5Neu5Ac1Hex5	2693.01
			1243.43	1243.43	0.56296	[M-2H]-2	FA2G2S2	HexNAc2Hex12	2488.87
			1345.98	1346	12.8529	[M-2H]-2	A3G2Lac2	HexNAc7Hex7	2694
36	9.54	18.474	1170.92	1170.93	4.44092	[M-2H]-2	FA2F1G2S1	dHex2HexNAc4Neu5Ac1Hex5	2343.87
			1207.44	1207.44	0.828201	[M-2H]-2	A3G3S1	HexNAc5Neu5Ac1Hex6	2416.89
			1280.47	1280.47	1.24955	[M-2H]-2	A3F1G3S1	dHex1HexNAc5Neu5Ac1Hex6	2562.95
			1382.52	1382.52	3.03794	[M-2H]-2	FA3BF2G3	dHex3HexNAc6Hex6	2767.05
			2001.69	2001.71	8.4428	[M-H]-1	M9	HexNAc2Hex9	2002.71
			1000.34	1000.35	4.59839	[M-2H]-2
37	9.63	19.158	1170.92	1170.93	10.4191	[M-2H]-2	FA2F1G2S1	dHex2HexNAc4Neu5Ac1Hex5	2343.87
			1344.98	1344.99	7.43501	[M-2H]-2	FA2BG2S2	dHex1HexNAc5Neu5Ac2Hex5	2691.99
			1272.99	1272.98	5.3418	[M-2H]-2	FA2BF3G2	dHex4HexNAc5Hex5	2547.97
			1280.45	1280.47	10.1526	[M-2H]-2	FA3G3S1	dHex1HexNAc5Neu5Ac1Hex6	2562.95
38	9.89	19.868	1170.4	1170.42	12.2179	[M-2H]-2	A2G2S2	HexNAc4Neu5Ac2Hex5	2342.85
39	10.1	20.265	1271.95	1271.96	3.45923	[M-2H]-2	A2BG2S2	HexNAc5Neu5Ac2Hex5	2545.93
40	10.21	20.518	1243.45	1243.45	1.68885	[M-2H]-2	FA2G2S2/A2F1G2S2	dHex1HexNAc4Neu5Ac2Hex5	2488.91
			1280.47	1280.47	1.24955	[M-2H]-2	A3F1G3S1	dHex1HexNAc5Neu5Ac1Hex6	2562.95
			1308.96	1308.98	12.6817	[M-2H]-2	A4G3S1	HexNAc6Neu5Ac1Hex6	2649.97
			1317.47	1317.48	10.854	[M-2H]-2	FA4G4	dHex1HexNAc6Hex7	2636.98
			1345.97	1346	18.4993	[M-2H]-2	A4BG4	HexNAc7Hex7	2694
41	10.74	21.228	1353.51	1353.49	7.53605	[M-2H]-2	A3F2G3S1	dHex2HexNAc5Neu5Ac1Hex6	2709
			1426.01	1426.01	1.61289	[M-2H]-2	FA3G3S2	dHex1HexNAc5Neu5Ac2Hex6	2854.04
42	10.89	22.495	998.672	998.686	13.718	[M-3H]-3	A3G3S3	HexNAc5Neu5Ac3Hex6	2999.08
			1426.52	1426.52	0.981407	[M-2H]-2	A3F3G3S1	dHex3HexNAc5Neu5Ac1Hex6	2855.06
			1527.53	1527.55	18.2645	[M-2H]-2	FA3BG3S2	dHex1HexNAc6Neu5Ac2Hex6	3057.12
			1115.73	1115.74	9.41082	[M-3H]-3	A4BG4Lac1S1	HexNAc8Neu5Ac1Hex8	3350.23
43	11.17	23.559	999.372	999.366	6.00381	[M-3H]-3	FA2F3G2Lac1S1	dHex4HexNAc5Neu5Ac1Hex5	3001.12
			1426.03	1426.01	9.11632	[M-2H]-2	A3F1G3S2	dHex1HexNAc5Neu5Ac2Hex6	2854.04
			1499.04	1499.04	4.93648	[M-2H]-2	A3F2G2S2	dHex2HexNAc5Neu5Ac2Hex6	3000.1
44	11.43	24.13	1609.58	1609.59	3.47915	[M-2H]-2	A4G4Lac2	HexNAc8Hex9	3221.19
45	11.57	24.632	1498.5	1498.53	19.4857	[M-2H]-2	A3G3S3	HexNAc5Neu5Ac3Hex6	2999.08
			999.029	999.026	2.60253	[M-3H]-3	FA3F1G3S2	dHex2HexNAc5Neu5Ac2Hex6	3000.1
			1140.41	1140.42	8.76867	[M-3H]-3	FA4BF4G4	dHex5HexNAc7Hex7	3424.29
			1711.13	1711.14	3.85708	[M-2H]-2		dHex5HexNAc7Hex7	3424.29
			1468.05	1468.06	10.0813	[M-2H]-2	*FA4BF4G1	dHex5HexNAc7Hex4	2938.14
46	11.98	26.001	1609.57	1609.59	13.606	[M-2H]-2	A3G3Lac3	HexNAc8Hex9	3221.19
			1095.71	1095.72	6.75356	[M-3H]-3	A3G3S4	HexNAc5Neu5Ac4Hex6	3290.17
			1169.77	1169.75	9.83112	[M-3H]-3	A4G4Lac2S1	HexNAc8Neu5Ac1Hex9	3512.29
47	12.36	26.676	1096.07	1096.06	11.3133	[M-3H]-3	FA3F1G3S3	dHex2HexNAc5Neu5Ac3Hex6	3583.31
48	12.51						NA
49	12.8						NA
50	13.21						NA
*1fragment of FA4BF4G4
NA= not assigned
