# Supplementary material for: N -Linked glycosylation profiles of therapeutic induced senescent (TIS) triple negative breast cancer cells (TNBC) and their extracellular vesicle (EV) progeny
Source: Royal Society of Chemistry journal article supplement (doi:10.1039/d0mo00017e), 2020-12-16
Supplement: d0mo00017e11.xlsx [file d0mo00017e11.xlsx]

## Sheet: Areas
		WCL Control	WCL TIS	Membrane Control	Membrane TIS	EV Control	EV TIS	Cytoplasm Control	Cytoplasm TIS
	High mannose	25.7433	26.152	29.7434	22.5858	23.3008	18.556	22.9	21.711
	Monoantennary	0	0.881	0.329333	0.9215	0.834	0.721	0.454667	0.874
	Biantennary	10.3205	8.81656	6.62733	14.7925	14.3227	9.51633	10.2989	7.75517
	Triantennary	17.2873	15.9112	7.0265	12.197	33.011	14.7943	7.11117	7.03289
	Tetranantennary	2.64	2.46422	2.43933	3.1655	1.65333	0.892	1.41	1.702
	Lac	0.968	1.59	1.56	3.464	1.194	1.424	0.94	2.76
	Outer arm fucose	5.42903	14.5772	9.03792	12.1825	9.1	8.13628	9.47069	9.42801
	Core fucose	14.58	20.2761	14.7594	20.8433	16.2931	14.2808	13.32	13.825
	Bisects	10.3769	7.83056	6.38783	13.89	6.983	5.65833	7.7515	8.54167
	Galactosylation G0	22.8767	22.092	24.9372	21.5533	16.0833	15.568	21.5597	20.3497
	Galactosylation G1	4.05778	2.46778	4.27056	7.01667	2.99333	2.84	2.43167	4.52204
	Galactosylation G2	14.7102	20.307	12.2522	18.14	19.0433	13.4672	15.1846	12.6703
	Galactosylation G3	16.4854	16.927	10.6642	13.31	36.0056	17.177	9.11889	8.15296
	Galactosylation G4	3.97	3.04	2.59667	2.63667	1.11333	1.83	2.52083	1.98
	Galactosylation beta 1-3	21.3133	20.0144	9.7	11.85	29.62	22.54	15.7433	14.01
	Galactosylation beta 1-4	6.96	2.13	6.24	14.03	7.16	3.33	2.56	3.28
	Galactosylation both	5.37333	6.48	1.66	2.32	9.5	0	0.2	0.5
	Total Galactosylation	39.23	42.8694	28.2633	39.81	54.45	32.796	28.5233	24.47
	Sialylation S0	34.9183	35.8728	34.3233	33.57	24.705	23.8217	31.85	31.5583
	Sialylation S1	7.62417	11.1639	9.39917	15.88	10.9083	7.125	8.42917	9.68083
	Sialylation S2	6.1925	7.84	6.80133	9.6	14.5933	7.36	7.55917	4.20083
	Sialylation S3	7.25	8.855	2.79	3.14	26.4	13.1	2.62583	1.69
	Sialylation S4	4.85	2.46	0.54	0.28	0	0.62	1.24	1.28
	Sialylation alpha2-3	4.02667	17.07	7.37417	13.77	16.85	2.58	8.95389	5.085
	Sialylation alpha2-6	13.55	11.8589	11.4463	15.13	15.5417	11.385	10.21	11.2167
	Sialylation both	8.34	1.39	0.71	0	19.51	14.24	0.82	0.55
	Total Sialylation	25.92	30.3189	19.5305	28.9	51.9017	28.205	19.99	16.8517

## Sheet: WCL CTRL
WCL CTRL		UND				JBM				NAN1					ABS					ABS+SPG					ABS+BTG					ABS+BTG+GUH
Peak number	% Area	GU	%area	Glycan		% Area	GU	Glycan		% Area	GU	%area	Glycan		% Area	GU	%area	Glycan		% Area	GU	%area	Glycan		% Area	GU	%area	Glycan		% Area	GU	%area	Glycan
1	14.95	4.11	14.95	junk		18.42	4.1			13.85	4.15	14.48	junk		14.87	4.09	14.87	junk		15.51	4.13	15.52	junk		14.19	4.12	14.95	junk		13.25	4.16	13.25	junk			UND	NAN1	ABS	ABS+SPG	ABS+BTG	ABS+BTG+GUH
						0.28	4.28			0.63	4.27									0.01	4.42				0.76	4.24				11.15	4.29	11.15	M3		high mannose	24.225	23.765	25.7533	25.7533	23.66	46.5	24.6313
2	0.01	4.47				0.02	4.44			0.02	4.55				0.01	4.48				0.01	4.5				0.03	4.47				0.02	4.46				fucosylated high mannose	1.12	1.07	1.11	1.1	1.16	8.08	1.112	25.7433	total high mannose
																									0.02	4.59									A1							0					BRANCHING
3	1.12	4.68				0.03	4.58			1.07	4.74				1.11	4.65				1.1	4.69				1.16	4.68				17.69	4.76	12.69	M3B/A1		FA1							0					A1= 1 antenna
			1.12	FM3								1.07	FM3				1.11	FM3				1.1	FM3				1.16	FM3				5	FM3		A1B							0		total			A2 =2 antennas
4	6.75	4.8	6.75	junk		8.78	4.8			6.51	4.86	6.51	junk		6.55	4.77	6.55	junk		6.96	4.83	6.96	junk		6.9	4.8	6.9	junk		7.03	4.88	7.03	junk		FA1B							0	0	monoantennary			A3 =3 antennas
																																			A2	3.74917	3.61	3.24	3.22	3.24		3.41183					A4 =4 antennas
5	0.15	5.05				0.16	5.08			0.16	5.14				0.14	5				0.03	5.03				0.14	5.05				0.35	5.13				FA2	2.685	2.685	1.14	3.34	2.66	0.01	2.502
																				0.11	5.07									5.54	5.24	3.08	FM3B		A2B	2.46	2.51	2.39	4.35	2.46	0.01	2.834
6	0.26	5.23				0.22	5.22			0.24	5.32				0.25	5.2				0.2	5.26				3.24	5.3						2.46	M4		FA2B	1.4725	1.6275	2.06667	2.12667	1.57	0.15	1.77267	10.5205	biantennary
																				0.31	5.32									0.04	5.39				A3	11.345	12.8767	12.34	10.17	11.87	0.3	11.7203
																											3.24	A2							FA3	4.09	3.445	2.97	2.7	2.6	0.15	3.161
7	7.96	5.55				10.34	5.55			7.65	5.64				7.7	5.52				0	5.46				8.03	5.55				0.11	5.51				A3B	0.735	0.925	0.66	0.9	0.9		0.824
																				0.01	5.47														FA3B	0.93	0.93	1.86	1.86	1.33	1.36	1.382	17.0873	triantennary
			7.96	junk								7.65	junk				7.7	junk		8.13	5.59	7.13	junk				7.03	junk		7.86	5.65	7.97	junk		A4	1.63	1.63	1.2	1.58	1.63		1.534
8	0.53	5.75				1.01	5.75			0.59	5.86				0.62	5.72				1.29	5.78				14.9	5.76				0.12	5.79				FA4	0.18	0.18	0.18	0.91	0.63	0.58	0.416
																											2.46	A2B		0.32	5.85	0.01	A2B		A4B	0.03	0.3	0.69	0.67	0.5		0.438
						0.15	5.93															2.29	A3				11.87	A3				0.3	A3		FA4B	0.23	0.23	0.23	0.28	0.28	0.3	0.25	2.638	tetranantennary
																											2.66	FA2				0.01	FA2		Lac-total	0.7	0.83	0.87	1.01	1.43	0	0.968
																									0.43	5.87				0.33	5.97				OAF-total	5.25333	6.64083	5.58	4.96	4.59	5.55	5.42903
9	1.4	6.08	1.4	M5		0.72	6.15			1.42	6.2	1.42	M5		1.55	6.06	1.55	M5		2.95	6.17	1.55	M5		0.54	6.02	1.55	M5		1.74	6.21	1.74	M5		junk	34.66	33.84	32.55	32.3	36.53	34.74
																											1.23	M4A2							sum	95.495	97.095	94.83	97.23	97.04	97.73
																									8.11	6.13	1.23	M4A2B		0.3	6.3					95.495	97.095	94.83	97.23	97.04	97.73
																						0.9	A3B				0.9	A3B
																											1.57	FA2B				0.15	FA2B		Total core fucose	15.1223	14.7948	14.2067	15.3867	13.89	15.06	14.7434
																						0.5	FA3				2.6	FA3				0.15	FA3		Total bisects	8.8115	9.2165	11.0933	12.2533	10.51		10.3769
																																			Lac:	UND	NAN1	ABS	ABS+SPG	ABS+BTG
10	2.85	6.31				3.83	6.33			2.84	6.43				2.76	6.29				3.99	6.37				2.79	6.31				2.78	6.44				A2Lac
																						2.2	FA2G(3)1												FA2Lac
																																0.19	A1F1G1		A3Lac
			2.85	junk								2.84	junk				2.76	junk				1.79	junk				2.79	junk				2.59	junk		A4Lac	0.57	0.57	0.74	0.58	0.24
11	0.37	6.45				0.66	6.47			0.4	6.59				0.39	6.43				0.58	6.5				2.96	6.43				1.36	6.6				FA4Lac	0	0	0	0	0
																																			A4BLac	0.13	0.26	0.13	0.2	0.69
																											1.33	FA3B				1.36	FA3B		total	0.7	0.83	0.87	0.78	0.93
																						1.58	A4				1.63	A4
12	0.34	6.54				0.43	6.65			0.31	6.69				0.49	6.53				1.64	6.61				0.64	6.54									OAF:	UND	NAN1	ABS	ABS+SPG	ABS+BTG
			0.37	A2BG1								0.4	A2BG1				0.39	A2BG(3)1				2.35	A2BG(3)1												A1BF
																																			FA1BF
																																			A2F
			0.34	A3G1								0.31	A3G1				0.49	*A3G(3)1		2.35	6.72	0.64	A3G(3)1		0.09	6.67				0.1	6.83				FA2F	0.959167	1.00417	0.77	0.77	0.65
																																			A2BF
																																			FA2BF	0.640667	0.640667	0.59	0.59	0.24
13	0.53	6.84				0.95	6.88			0.58	6.99				0.59	6.82				1.82	6.89				1.13	6.83				1.84	7				A3F	0.5885	1.1335	0.66	1.02	0.95
																						0.5	A4B				0.5	A4B				1.84	FA1F1G1		FA3F	1.475	1.875	1.75	1.27	0.59
			0.53	FA2BG1								0.58	FA2BG1				0.53	FA2BG(3)1				0.41	FA2BG(3)1							0.58	7.06				A3BF
																						0.91	FA4				0.63	FA4				0.58	FA4		FA3BF	0.11	0.11	0.06	0.06	0.3
																																			A4F	0.03	0.3	0.27	0.25	0.3
																																			FA4F	0.57	0.5975	0.6	0.39	0.55
																																			A4BF
																																			FA4BF	0.88	0.98	0.88	0.61	1.01
																																			total	5.25333	6.64083	5.58	4.96	4.59
												0.06	A3G2				0.06	A3G(4)2																	Galactosylation	UND	NAN1	ABS
14	7.03	6.98	1.6	M6D3		2.96	7.08			6.89	7.13	1.6	M6D3		4.81	6.96	1.6	M6D3		6.6	7.04	1.6	M6D3		5.2	6.97	1.6	M6D3		6.56	7.14	1.6	M6D3		G0	22.715	22.205	23.71	22.8767	no galactose
			1.6	M6D1								1.6	M6D1				1.6	M6D1				1.6	M6D1				1.6	M6D1				2	M6D1		G1	3.80333	3.85333	4.51667	4.05778	1 galactose
			1.1	A2G2								0.81	A2G2				3.24	A2G(3)2				3.22	A2G(3)2												G2	14.5282	16.299	13.3033	14.7102	2 galactoses
			1.57	FA3G1								1.57	FA3G1				1.57	*FA3G(3)1				1.4	FA3G(3)1												G3	16.2785	16.5677	16.61	16.4854	3 galactoses
																																			G4	3.5	4.27	4.14	3.97	4 galactoses
			1.16	junk								1.31	junk				0.62	junk				0.32	junk				4.46	junk				2.96	junk		beta1-3				21.3133
															4.51	7.04				3.22	7.11				3.43	7.04				0.23	7.26				beta1-4				6.96333
																														0.07	7.33				both				5.37333
																											0.28	FA4B				0.3	FA4B		total G				39.23
15	0.61	7.26				1.26	7.3			0.71	7.42				1.03	7.24				0.32	7.25				0.41	7.26	0.41	FA2F1G1		0.22	7.47	0.22	FA2F1G1
			0.77	A2BG2								0.71	A2BG2				2	A2BG(3)2				2	A2BG(3)2												Sialylation	UND
																																			S0	34.9183				no sialic acid
																																			S1	7.62417				1 sialic acid
																																			S2	6.1925				2 sialic acids
16	0.16	7.41				1.03	7.52			0.22	7.5				0.28	7.32				1.14	7.36				0.34	7.37				0.05	7.5				S3	7.25				3 sialic acids
																																			S4	4.85				4 sialic acids
																																			alpha2-3	4.02667				total 2-3 linked
																																			alpha2-6	13.55				total 2-6 linked
17	0.61	7.46								1.16	7.63	2.09	A3G(3)2		2.11	7.45	1.25	*A3G(3)2				3.97	A3G(3)2		0.55	7.39	0.55	FA4BF1G1		0.29	7.55	0.29	FA4BF1G1		both	8.34
																				3.97	7.48				0.18	7.48									total S	25.9167				total sialylation
												0.39	FA2G2				1.14	FA2G(3)2				1.14	FA2G(3)2
18	2.69	7.63				3.58	7.68			3.4	7.8				4.61	7.61				3.21	7.58				0.32	7.55				0.07	7.71
			1.53667	M4A2G2								1.53667	M4A2G2				1.53667	M4A2G(3)2				1.71667	M4A2G(3)2
			0.02	A2BG1S(6)1								0.02	A2BG1S(6)1														0.32	FA4F1G1				0.07	FA4F1G1
			0.973333	M4A2BG1								0.973333	M4A2BG1				1.53667	M4A2BG(3)1		1.94	7.68	1.71667	M4A2BG(3)1		0.27	7.61				0.3	7.8
			0.16	FA2BG2								0.16	FA2BG2				1.53667	FA2BG(3)2				1.71667	FA2BG(3)2
19	0.99	7.75				1.39	7.8			1.05	7.91				1.03	7.74				1.07	7.81				1.09	7.74	0.69	A4BG1GlcNAc1		0.94	7.93
																																0.2	A2F2G2
			0.99	junk								1.05	junk				0.05	junk				0.58	junk				0.4	junk				0.94	junk
20	4.06	7.86	0.48	FA3G2		0.36	7.87			3.98	8.03	0.48	FA3G2		3.9	7.85	1.1	*FA3G(3)2		5.28	7.92	0.8	FA3G(3)2		3.78	7.85				3.53	8.04
			3.58	M7 D3								3.5	M7 D3				3.78	M7 D3				3.5	M7 D3				3.78	M7 D3				3.53	M7 D3
21	0.8	7.97				0.6	8.09			0.43	8.14				0.36	7.96									0.5	7.95				0.38	8.15
			0.7	M7 D1								0.33	M7 D1				0.18	M7 D1				0.18	M7 D1				0.5	M7 D1				0.38	M7 D1
			0.1	FA2F1G2								0.1	FA2F1G2				0.18	FA2F1G2				0.18	FA2F1G2
																						1.11	FA3BG(3)2
22	0.11	8.09								0.51	8.23				0.57	8.03				1.39	8.09				0.36	8.04				0.23	8.26
			0.055	M6A1								0.055	M6A1				1.39	M6A1				1.39	M6A1				0.36	M6A1
			0.06	A3G2S(3)1
23	1.46	8.25	0.486667	A2G2S(3)1		1.69	8.31			3.12	8.44				2.93	8.15				1.18	8.2				0.48	8.13				0.19	8.38
			0.486667	FA2F2G2								0.486667	FA2F2G2				0.59	FA2F2G2				0.59	FA2F2G2				0.24	FA2F2G2				0.27	FA2F2G2
			0.486667	FA2BF2G2								0.486667	FA2BF2G2				0.59	FA2BF2G2				0.59	FA2BF2G2				0.24	FA2BF2G2				0.27	FA2BF2G2
												2.60167	A3G3		9.61	8.25	3.51333	A3G(4,4,3)3		3	8.31				0.24	8.24				0.25	8.45
																	3.51333	*A3G(3)3				3.27	A3G(3)3
																											0.24	FA3F1G1				0.25	FA3F1G1
																				0.27	8.41				0.07	8.35	0.07	M6A2		0.05	8.56
																	3.51333	A3G(4)3
24	0.64	8.36				0.7	8.43			0.7	8.65				0.69	8.46				1.21	8.52				0.63	8.44				0.62	8.66
			0.64	FA2BG2S(6)1								0.7	FA2BG2S(6)1
																											0.63	A3F2G2				0.62	A3F2G2
25	1.06	8.48				0.91	8.54			0.6	8.73	0.6	A3BG3		0.66	8.52	0.66	A3BG(4)3		0.3	8.59				0.24	8.57				0.17	8.79
																											0.24	A4G2GlcNAc2
						0.28	8.59
26	8.48	8.72				1.68	8.73			9.63	8.91				2.16	8.64				8.34	8.76				7.33	8.69				6.72	8.91
			1.3	A2BG(3)2S(6)1								1.38	A2BG(3)2S(6)1
												0.01	FA3G3				0.3	FA3G(4)3
			0.75	FA3BG3								0.75	FA3BG3				1.86	*FA3BG(3,3,4)3				0.75	FA3BG(3)3
															7.49	8.71
			7.49	M8 D2,D3								7.49	M8 D2,D3				7.49	M8 D2,D3				7.59	M8 D2,D3				7.33	M8 D2,D3				6.72	M8 D2,D3
27	1.5	8.91				1.46	8.99			2.46	9.11				1.35	8.93				0.66	8.93				0.35	8.85				0.3	9.08
																						0.66	FA3F2G2				0.35	FA3F2G2				0.3	FA3F2G2
			1.5	FA2G2S(6)1								1.5	FA2G2S(6)1
28	0.58	9.02																		0.45	8.99				0.22	8.93	0.3	FA3BF2G2		0.33	9.14	0.11	FA3BF2G2
																											0.3	A4F2G2				0.11	A4F2G2
						2.48	9.2			0.59	9.27
29	1.51	9.11	0.295	FA2G2S(6)2								0.295	FA2G2S(6)2		0.51	9.05				0.3	9.1				0.23	9.1				0.22	9.34
			1.215	FA3G2S(6)1								1.255	FA3G2S(6)1
																	0.51	FA4F2G2				0.3	FA4F2G2				0.23	FA4F2G2				0.22	FA4F2G2
30	0.53	9.23	0.27	A2G2S(6)2		0.6	9.31			0.65	9.42	0.33	A2G2S(6)2		0.66	9.22				1.11	9.26				0.58	9.19				0.46	9.41
			0.265	A3BG3S(6)1								0.325	A3BG3S(6)1
																	0.66	A3F2G3				0.53	A3F2G3
																						0.58	A4G(3)3GlcNAc2
31	0.82	9.33				1.31	9.43			0.43	9.51				4.67	9.44				0.28	9.39	0.28	FA4BF2G2		4.74	9.42	0.28	FA4BF2G2		4.28	9.64	0.28	FA4BF2G2
			0.82	*FA2G2S(6)2								0.43	FA2G2S(6)2
32	4.83	9.45								9.25	9.63
																				4.91	9.47
																											0.5	A4G3GlcNAc3
												3.14	A3G3S(6)1
																						0.2	A4BG(3)4GlcNAc1
			4.83	M9								4.8	M9				4.67	M9				4.71	M9				4.07	M9				4	M9
33	2.06	9.53				2.55	9.64			1.24	9.73				0.7	9.64				0.39	9.64				0.11	9.58				0.18	9.8
			1.75	A2G2S(6)2 (sulphated GlcNAc)								2	A2G2S(6)2 (sulphated GlcNAc)
			0.07	FA2G2S(6)2								0.07	FA2G2S(6)2
			0.1	FA2F2G2S(6)1								0.1	FA2F2G2S(6)1
			0.01	FA3F2G3								0.01	FA3F2G3				0.25	FA3F2G3				0.25	FA3F2G3
			0.07	FA3F2G2S(6)1								0.07	FA3F2G2S(6)1
			0.06	FA3BF2G3								0.06	FA3BF2G3				0.06	FA3BF2G3				0.06	FA3BF2G3
																	0.18	FA4G(4)3
34	0.24	9.68	0.12	M6A2G2								0.12	M6A2G2				0.08	M6A2G(3)2				0.08	M6A2G(3)2
			0.12	FA2F1G2S(6)2								0.12	FA2F1G2S(6)2
35	0.73	9.81				0.63	9.76			0.47	9.88
															0.46	9.81				0.56	9.81				0.37	9.78				0.32	9.99
			0.1425	A2G2S(6)2								0.47	A2G2S(6)2
						0.77	9.92			0.75	10
			0.1425	FA2F1G2S(6)2								0.1875	FA2F1G2S(6)2
			0.1425	FA2BG2S(6)2								0.1875	FA2BG2S(6)2
			0.1425	A3F2G3S(6)1								0.1875	A3F2G3S(6)1
			0.16	FA4F1G3S(6)1								0.1875	FA4F1G3S(6)1
36	0.76	10.02	0.01	FA2F2G2S(6)1		1.02	10.13			0.66	10.1	0.01	FA2F2G2S(6)1
			0.29	FA4F1G3S(6)1								0.19	FA4F1G3S(6)1
			0.23	FA4BG4								0.23	FA4BG4				0.23	FA4BG(3)4				0.28	FA4BG(3)4
			0.23	FA4BF1G4								0.23	FA4BF1G4				0.23	FA4BF1G4				0.28	FA4BF1G4
37	1.11	10.12				1.48	10.23			3.24	10.26				1.63	10.02				0.04	9.93				0.34	9.98				0.23	10.18
			0.34	M10								0.34	M10				0.34	M10		0.57	10.04	0.12	M10				0.34	M10				0.23	M10
			0.154	FA2BF2G2S(6)1								0.154	FA2BF2G2S(6)1
			0.426	A3F2G3S(6)1								0.926	A3F2G3S(6)1
																	0.36	FA3F1G3				0.36	FA3F1G3
			0.18	FA3BG3S(6)2								0.18	FA3BG3S(6)2
			0.01	FA3BF2G3S(6)1								0.01	FA3BF2G3S(6)1
												1.63	A4G4				1.2	A4G(4)4
																	0.09	FA4F2G3				0.09	FA4F2G3
38	0.74	10.22				1.31	10.35			1.14	10.34				1.27	10.15				0.49	10.21				0.32	10.17				0.09	10.29
			0.74	FA3F3G3								1.14	FA3F3G3				1.14	FA3F3G3				0.49	FA3F3G3				0.32	FA3F3G3				0.31	FA3F3G3
																	0.13	A4BG(4)4Lac1												0.22	10.38
39	0.1	10.37	0.025	*FA3G3S(6)2						0.35	10.49	0.02	FA3G3S(6)2		0.36	10.25				0.17	10.4				0.25	10.54
			0.03	FA3BF2G3S(6)1								0.03	FA3BF2G3S(6)1
			0.03	A4BG4								0.3	A4BG4				0.69	*A4BG(4)4				0.17	A4BG(3)4
			0.03	A4F2G4						0.3	10.58	0.3	A4F2G4		0.27	10.53	0.27	A4F2G4		0.25	10.55	0.25	A4F2G4
40	0.23	10.4				0.41	10.52			0.49	10.75
			0.115	*A3G3S(6)2								0.375	A3G3S(6)2		0.39	10.8				0.1	10.69				0.24	10.76
			0.115	FA3F2G3S(6)1								0.115	FA3F2G3S(6)1
																				0.23	10.8	0.23	A4G(3)4Lac2GlcNAc1
41	1.38	10.66	0.01	A3F2G3S(6)1		1.83	10.76			3.29	10.87	0.01	A3F2G3S(6)1							0.05	10.94				0.19	11.03
			0.05	FA3F2G3S(6)1								0.05	FA3F2G3S(6)1
			0.18	FA4G3S(6)1								0.18	FA4G3S(6)1
42	0.76	10.81	1.46	A3G3S(6)3		1.06	10.91					2.71	A3G3S(6)3		0.54	11.3									0.05	11.36
			0.01	A3F2G3S(6)1								0.01	A3F2G3S(6)1
			0.01	FA3BF2G3S(6)1								0.01	FA3BF2G3S(6)1
			0.42	FA4BF2G4								0.32	FA4BF2G4				0.54	FA4BF2G4
43	0.26	10.99				0.39	11.07			0.39	11.22
			0.13	FA3F2G3S(6)1								0.13	FA3F2G3S(6)1
			0.13	A4BG4Lac1S(6)1								0.26	A4BG4Lac1S(6)1
44	4.17	11.11				5.16	11.22			0.65	11.32				0.31	11.37									0.18	11.54
			0.69	A3G3S(3)3
			0.69	A3BG3S(3)3
			0.47	FA3G3S(3)3
			1.63	A4G4S(3)2
45	0.21	11.26				1.16	11.49
46	0.68	11.38	0.34	A3G3S(6)3						1.34	11.52	0.49	A3G3S(6)3		0.62	11.48
			0.11	FA3G3S(6)3								0.11	FA3G3S(6)3
			0.11	A4G4Lac2								0.11	A4G4Lac2				0.51	A4G(3)4Lac2
			0.11	FA4F2G3S(6)2								0.21	FA4F2G3S(6)2
			0.11	FA4BF2G4S(6)1								0.21	FA4BF2G4S(6)1
			0.11	FA4BF4G4								0.21	FA4BF4G4				0.11	FA4BF4G4				0.05	FA4BF4G4				0.18	FA4BF4G4
47	4.31	11.52	3.49	*A3G3S(3,3,6)3		5.31	11.64			0.6	11.63	0.46	A3G3S(6)3		0.23	11.75
			0.35	FA3F1G3S(6)2						0.33	11.97	0.35	FA3F1G3S(6)2
			0.46	A4G4Lac3								0.46	A4G4Lac3				0.23	A4G(4)4Lac3
			0.01	FA4F2G3S(6)2						0.35	12.13	0.01	FA4F2G3S(6)2												0.17	11.84
48	3.06	11.95				3.76	12.05			0.28	12.49
										0.66	12.7				0.86	12.59									0.2	12.6
			4.85	*A3G3S(3,3,3,6)4								0.64	A3G3S(6)4
			0.01	FA3F1G3S(6)2								0.01	FA3F1G3S(6)2
			0.01	FA4BF2G4S(6)2								0.01	FA4BF2G4S(6)2
49	1.21	12.34				1.4	12.44			0.13	12.88
50	0.6	12.49				0.77	12.59								0.09	12.83
51	0.5	12.8				0.57	12.87			0.11	13.25				0.06	13.01
52	0.22	12.98				0.36	13.09								0.12	13.3
53	0.39	13.12				0.5	13.2			0.6	13.77				0.4	13.61
54	0.19	13.61				0.38	13.67			0.05	14.03				0.32	13.69
55	0.21	13.77				0.52	14.15			0.17	14.59
56	0.2	14.21				0.4	14.92			0.36	14.82				0.39	14.78
Sum	100.01		95.495			100.03				100		97.095			99.99		94.83			100		97.23			100.02		97.04			100.01		97.73
*=Major link

## Sheet: WCL Treated
WCL Treated		UND				JBM				NAN1					ABS					ABS+SPG					ABS+BTG					ABS+BTG+GUH
Peak number	% Area	GU	%area	Glycan		% Area	GU	Glycan		% Area	GU	%area	Glycan		% Area	GU	%area	Glycan		% Area	GU	%area	Glycan		% Area	GU	%area	Glycan		% Area	GU	%area	Glycan			UND	NAN1	ABS	ABS+SPG	ABS+BTG	ABS+BTG+GUH
1	12.38	4.13	11.7	junk		15.54	4.1			11.21	4.18	11.21	junk		11.95	4.08	11.27	junk		12.77	4.12	12.09	junk		11.83	4.04	11.83	junk		10.85	4.17	10.85	junk		high mannose	19.17	20.08	18.96	20.64	20.57	47.64	24.51
			0.68	M3		0.34	4.28			0.61	4.3	0.61	M3				0.68	M3				0.68	M3		0.68	4.13	0.68	M3		20.76	4.31	20.76	M3		fucosylated high mannose	1.79	1.48	1.52	1.74	1.68	11.85	1.642	26.152	total high mannose			BRANCHING
2	0.03	4.53				0.02	4.43			0.01	4.47				0.02	4.48				0.02	4.44				0.06	4.38				0.05	4.6				A1							0					A1= 1 antenna
																				0.04	4.51				0.03	4.47									FA1	0.16	0.16	0.16	0.16	0.16	0.16	0.16					A2 =2 antennas
3	1.01	4.7				0.06	4.6			1	4.78				1.03	4.64				1.07	4.69				1.06	4.58				19.85	4.78	10.85	M3B/A1		A1B	0.33	0.37	0.4	0.34	0.36		0.36		total			A3 =3 antennas
			1.01	FM3								1	FM3				1.03	FM3				1.07	FM3				1.06	FM3				9	FM3		FA1B	0.34	0.37	0.365	0.365	0.365	0.08	0.361	0.881	monoantennary			A4 =4 antennas
4	5.89	4.82	5.89	junk		7.23	4.8			5.41	4.9	5.41	junk		5.61	4.76	5.61	junk		5.93	4.82	5.93	junk		5.71	4.71	5.71	junk		5.67	4.9	5.67	junk		A2	3.425	3.425	3.28	4.09	3.91		3.626
5	0.17	5.08				0.27	4.97			0.23	5.15				0.27	5				0.05	5				0.14	4.95				0.58	5.15				FA2	3.86	3.29	2.635	2.635	2.87	0.01	3.058
																				0.19	5.06									1.91	5.26	0.06	M4		A2B	1.52	1.8	1.22	1.31	1.25	0.01	1.42
6	0.3	5.25	0.29	A1B		0.33	5.29			0.34	5.35	0.33	A1B		0.37	5.18	0.36	A1B		0.3	5.25	0.3	A1B		4.43	5.18	0.36	A1B				2.27	FM3B		FA2B	0.639444	0.394444	0.844444	0.844444	0.84	0.01	0.712556	8.81656	biantennary
																				0.39	5.31						0.16	FA1				0.16	FA1		A3	11.2489	10.7906	11.59	11.21	11.6	0.14	11.2879
			0.01	A2								0.01	A2				0.01	A2				0.39	A2				3.91	A2		0.03	5.44				FA3	3.14	2.84	4.1	3.16	3.5	0.06	3.348
																				0	5.44				0.1	5.3				0.08	5.53				A3B	0.37	0.25	0.37	0.37	0.37		0.346
7	7.06	5.58				7.93	5.56			6.41	5.67				6.6	5.51				0	5.47				6.54	5.44				7.01	5.67	3	A1F1		FA3B	0.99	1.01667	1.03	1.03	0.58	0.31	0.929333	15.9112	triantennary
			7.06	junk								6.41	junk				6.6	junk		6.94	5.58	6.94	junk				10	junk				4.01	junk		A4	0.91	0.91	0.31	0.31	0.31		0.55
8	0.68	5.78	0.34	FA1B		1.3	5.75			0.74	5.89	0.37	FA1B		0.73	5.7	0.365	FA1B		1.55	5.78	0.365	FA1B		18.59	5.62	0.365	FA1B		0.08	5.78	0.08	FA1B		FA4	1.44	2.72556	2.05556	2.27	1.03	0.09	1.90422
																						0.82	A2B				1.25	A2B		0.16	5.84	0.01	A2B		A4B	0.01	0.01	0.01	0.01	0.01		0.01
						0.21	5.93																				11.6	A3				0.14	A3		FA4B							0	2.46422	tetranantennary
			0.34	FA2								0.37	FA2				0.365	FA2				0.365	FA2				2.87	FA2				0.01	FA2		Lac-total	1.675	2.195	1.36	1.38	1.34		1.59
																									0.46	5.73				0.05	5.99				OAF-total	16.1633	16.6828	14.45	14.2489	12.94	12.9783	14.5772
9	1.67	6.11				0.78	6.2			1.57	6.23				1.74	6.05				3.31	6.16				0.49	5.9				1.92	6.22				junk	29.81	28.01	30.48	32.68	32.19	24.155
																	0.16	FA1G(3)1				0.16	FA1G(3)1		8.58	6									sum	96.9917	96.8	95.14	98.7933	95.875	97.4933
																											0.37	A3B								96.9917	96.8	95.14	98.7933	95.875	97.4933
																											0.36	A2F1				0.36	A2F1
																											0.84	FA2B				0.01	FA2B		Total core fucose	21.6078	21.5211	21.865	20.4378	17.225	19	20.2761
																											0.06	M4A1							Total bisects	8.22278	7.74944	8.10278	8.16778	6.91		7.83056
			1.5	M5								1.5	M5				1.5	M5				3.07	M5				3.45	M5				1.55	M5
			0.04	A1BG1								0.04	A1BG1				0.04	A1BG(3)1				0.04	A1BG(3)1							0.06	6.38
			0.04	A2G1								0.04	A2G1				0.04	A2G(3)1				0.04	A2G(3)1
																											3.5	FA3				0.06	FA3
10	2.85	6.34	0.01	A2G1		3.5	6.33			2.75	6.46	0.01	A2G1		2.76	6.28	0.01	*A2G(3)1		4.19	6.36	0.44	A2G(3)1		2.66	6.19				2.59	6.46				Lac:	UND	NAN1	ABS	ABS+SPG	ABS+BTG
			2.84	junk								2.74	junk				2.75	junk				3.75	junk				2.66	junk				2.59	junk		A2Lac
11	0.47	6.47	0.235	A2BF1		0.83	6.47			0.48	6.61	0.235	A2BF1		0.47	6.41	0.235	A2BF1		0.68	6.49	0.235	A2BF1		3.2	6.29	0.235	A2BF1		1.18	6.61	0.24	A2BF1		FA2Lac	0.53	0.5	0.35	0.57	0.53
			0.24	A3F1								0.24	A3F1				0.24	A3F1				3.03056	A3F1				2.655	A3F1				0.313333	A3F1		A3Lac	0.15	0.15	0.15	0.15	0.15
																																			A4Lac	0.835	1.385	0.7	0.5	0.5
																																			FA4Lac
																																			A4BLac	0.16	0.16	0.16	0.16	0.16
12	0.38	6.58	0.1	A2BG1		0.63	6.6			0.41	6.73	0.1	A2BG1		0.53	6.52	0.1	A2BG(3)1		1.96	6.6	0.1	A2BG(3)1		0.84	6.41						0.31	FM5		total	1.675	2.195	1.36	1.38	1.34
			0.1	A3G1								0.1	A3G1				0.1	*A3G(3)1				1.76	A3G(3)1
			0.1	FA3B								0.1	FA3B				0.1	FA3B				0.1	FA3B				0.58	FA3B				0.31	FA3B		OAF:	UND	NAN1	ABS	ABS+SPG	ABS+BTG	ABS+BTG+GUH
																											0.31	A4							A1BF	0.08	0.08	0.08	0.08	0.08
13	0.46	6.86	0.08	A1BF1G1		1.01	6.88			0.49	7.01	0.08	A1BF1G1		0.58	6.8	0.08	A1BF1G1		2.71	6.72	0.08	A1BF1G1		0.13	6.55	0.08	A1BF1G1		0.06	6.83	0.06	A1BF1G1		FA1BF					0.125
			0.06	FA2G1								0.06	FA2G1				0.06	FA2G(3)1				0.06	FA2G(3)1												A2F	0.925	1.04	1.23	0.78	1.2
			0.08	A2F1G1								0.08	A2F1G1				0.08	A2F1G1		1.75	6.89	0.08	A2F1G1		1.6	6.71	0.34	A2F1G1		0.51	7.01	0.34	A2F1G1		FA2F	4.32	5.11111	5.22	4.44	3.41
			0.0644444	FA2BG1								0.0644444	FA2BG1				0.0644444	FA2BG(3)1				0.0644444	FA2BG(3)1				0.06	M5A1							A2BF	0.475	0.475	0.475	0.475	0.475
			0.08	A3BF1								0.08	A3BF1				0.08	A3BF1				0.08	A3BF1				0.08	A3BF1				0.08	A3BF1		FA2BF	1.79833	1.89333	1.92833	2.39333	1.34333
																											0.01	A4B							A3F	5.885	5.68333	3.78	5.17056	5.305
			0.1	FA4								0.0555556	FA4				0.155556	FA4				1.45	FA4				1.03	FA4				0.09	FA4		FA3F	1.98	1.98	1.03667	0.64	0.746667
																																			A3BF	0.08	0.08	0.08	0.08	0.08
																																			FA3BF	0.13	0.13	0.13	0.13	0
																																			A4F
																																			FA4F
												0.07	M4A1G(3)1				0.06	M4A1G(3)1				0.06	M4A1G(3)1												A4BF
																																			FA4BF	0.49	0.21	0.49	0.06	0.17
																														0.91	7.07	0.91	FA1F1G1		total	16.1633	16.6828	14.45	14.2489	12.935
14	6.58	7	1.62	M6D3		2.8	7.09			6.5	7.15	1.62	M6D3		4.87	6.95	1.62	M6D3		6.52	7.03	1.62	M6D3		5.39	6.85	1.62	M6D3		6.28	7.15	1.62	M6D3
			1.62	M6D1								1.62	M6D1				1.62	M6D1				1.62	M6D1				1.62	M6D1				2.2	M6D1
			1.63	junk								1.55	junk				3.56	junk				3.28	junk				1.15	junk				0.325	junk		Galactosylation	UND	NAN1	ABS
															5.15	7.02				3.38	7.1				3.04	6.92				0.3	7.28	0.125	FA1BF1G1		G0	21.765	22.7206	21.7906	22.092	no galactose
			1.71	A2G2								1.71	A2G2				3.22	A2G(3)2				3.22	A2G(3)2				1.88	A3F1G1				0.4	A3F1G1		G1	2.90444	2.18444	2.31444	2.46778	1 galactose
																											2	FA2F1G1		0.09	7.33	2	FA2F1G1		G2	19.7733	20.6594	20.4883	20.307	2 galactoses
15	0.64	7.28				1.47	7.31			0.82	7.44				1.15	7.22				0.39	7.25				0.43	7.13				0.27	7.46				G3	20.1739	14.9906	15.6167	16.927	3 galactoses
																											0.43	FM5A1B				0.27	FM5A1B		G4	2.24	4.12	2.76	3.04	4 galactoses
												0.07	A3F1G1				0.03	A3F1G1																	beta1-3				20.0144
																																			beta1-4				2.13
																																			both				6.48
			0.64	A2BG2								0.75	A2BG2				1.12	*A2BG(4)2				0.39	A2BG(3)2												total G				42.8694
16	0.11	7.4				1.34	7.52			0.25	7.52				0.38	7.3				1.28	7.36				0.34	7.23				0.05	7.51
17	0.79	7.48	0.01	FA2G2						1.61	7.65	0.8	FA2G2		3.02	7.43	2.21	FA2G(3)2				2.21	FA2G(3)2		0.8	7.27				0.11	7.56				Sialylation	UND
			0.77	M6A1								0.8	M6A1				0.8	M6A1		4.58	7.47	0.8	M6A1				0.8	M6A1							S0	35.8728				no sialic acid
			0.01	FM5A2								0.01	FM5A2				0.01	FM5A2				0.19	FM5A2		0.19	7.36	0.19	FM5A2		0.08	7.71				S1	11.1639				1 sialic acid
18	2.95	7.64	0.16	FA1G1S(6)1		4.08	7.68			3.74	7.81	0.16	FA1G1S(6)1		4.97	7.59	0.06	M5A1G(3)1		3.39	7.57	0.06	M5A1G(3)1		0.35	7.42				0.33	7.8				S2	7.84				2 sialic acids
			0.36	A2F1G2								0.36	A2F1G2				0.36	A2F1G2				0.36	A2F1G2												S3	8.855				3 sialic acids
			0.01	FA2BG2								0.01	FA2BG2				0.59	FA2BG(3)2				0.59	FA2BG(3)2												S4	2.46				4 sialic acids
			0.29	FA2BF1G1								0.29	FA2BF1G1				0.29	FA2BF1G1				0.29	FA2BF1G1				0.29	FA2BF1G1				0.165	FA2BF1G1		alpha2-3	17.07				total 2-3 linked
			0.01	A3G2								0.8	A3G2				0.01	*A3G(3)2				4.81	A3G(3)2		0.44	7.51									alpha2-6	11.8589				total 2-6 linked
			1.76	FA3G2								1.76	FA3G2				3.68	*FA3G(3)2				1.84	FA3G(3)2												both	1.39
			0.35	FA3F1G1								0.35	FA3F1G1				0.35	FA3F1G1				0.27	FA3F1G1				0.35	FA3F1G1				0.165	FA3F1G1		total S	30.3189				total sialylation
			0.01	A4BG1								0.01	A4BG1				0.01	A4BG(3)1				0.01	A4BG(3)1
																				2.33	7.68	0.15	A3G2GlcNAc2				0.15	A3G2GlcNAc2
19	0.69	7.77	0.01	FA2BG2		0.88	7.8			0.83	7.92	0.14	FA2BG2		0.88	7.72	0.19	FA2BG(3)2		0.88	7.81	0.19	FA2BG(3)2		0.84	7.62				0.71	7.92
																						0.16	A4BG1GlcNAc1				0.16	A4BG1GlcNAc1
			0.69	junk								0.69	junk				0.69	junk				0.69	junk				0.84	junk				0.71	junk
20	4.02	7.88	1.91	M7 D3		0.53	7.88			3.88	8.04	1.91	M7 D3		3.82	7.83	1.91	M7 D3		5.27	7.92	1.71	M7 D3		3.7	7.72	1.71	M7 D3		3.42	8.04	1.71	M7 D3
			0.1	*A3F1G1S(3)1								0.03	A3F1G1S(6)1
			0.1	*M4A1G1S(3)1								0.03	M4A1G1S(6)1
			1.91	M7 D1								1.91	M7 D1				1.91	M7 D1				1.71	M7 D1				1.71	M7 D1				1.71	M7 D1
21	0.77	7.98	0.77	FM5A1BG1		0.72	8.06			0.47	8.15	0.47	FM5A1BG1		0.48	7.94	0.48	FM5A1BG(3)1				0.48	FM5A1BG(3)1		0.53	7.82				0.35	8.14
															0.42	8.01				1.32	8.09				0.44	7.92				0.29	8.26
22	0.13	8.11
			0.13	A3G2S(6)1						0.49	8.25	0.13	A3G2S(6)1
												0.36	FA3G3				0.42	*FA3G(3)3				1.32	FA3G(3)3
23	1.87	8.26	1.86	FA2G2S(6)1		2.32	8.32			4.48	8.45	1.86	FA2G2S(6)1		3.78	8.12				1.72	8.2				0.4	8				0.16	8.39
			0.01	FA2F1G2								0.01	FA2F1G2				3.78	FA2F1G2				3.09	FA2F1G2
															11.48	8.23				4.64	8.31				0.28	8.15				0.25	8.46
			0.99	A3G3								3.6	A3G3				1.5	A3G(4,4,3)3
																	4.98	A3G(4,3,3)3							0.16	8.23
																	5	A3G(3)3				4.64	A3G(3)3
																														0.14	8.57
24	0.75	8.37	0.375	A2F2G2		0.88	8.44			0.49	8.66	0.49	A2F2G2		0.79	8.35	0.79	A2F2G2		0.34	8.42	0.34	A2F2G2		0.5	8.33	0.5	A2F2G2		0.53	8.66	0.53	A2F2G2
			0.375	FA2BG2S(3)1											0.5	8.44				1.09	8.52				0.34	8.47				0.25	8.78
25	0.89	8.48	0.155	A2G2S(6)1		0.71	8.55			0.65	8.73	0.155	A2G2S(6)1
															0.73	8.5				0.37	8.61
			0.24	A2BF2G2								0.24	A2BF2G2				0.24	A2BF2G2				0.24	A2BF2G2				0.24	A2BF2G2				0.24	A2BF2G2
			0.37	A3BG3								0.25	A3BG3				0.37	A3BG(3)3				0.37	A3BG(3)3
26	7.92	8.72	0.4	FA2F2G2		0.26	8.62			9.17	8.92	0.4	FA2F2G2		2.25	8.61	1.44	FA2F2G2		7.57	8.76	1.35	FA2F2G2		6.3	8.57	1.41	FA2F2G2		5.83	8.91	1.8	FA2F2G2
												0.3	A3F2G2				0.6	A3F2G2				0.54	A3F2G2				0.4	A3F2G2				0.4	A3F2G2
			0.365	FA2BF2G2								0.25	FA2BF2G2				0.365	FA2BF2G2				0.3	FA2BF2G2				0.34	FA2BF2G2				0.25	FA2BF2G2
			0.09	FA2BG2S(6)1								0.09	FA2BG2S(6)1
			0.75	A3F1G3		2.1	8.74					0.75	A3F1G3		6.98	8.69	1.45	A3F1G3				1	A3F1G3
																						0.5	A4G2GlcNAc2				0.5	A4G2GlcNAc2
			0.24	FA3G2S(6)1								0.24	FA3G2S(6)1
			0.06	M5A1G1S(6)1								0.06	M5A1G1S(6)1
			0.87	FA3BG(3)3								0.87	FA3BG(3)3				0.93	FA3BG(3)3				0.93	FA3BG(3)3
			5.27	M8 D2,D3								6.22	M8 D2,D3				5.07	M8 D2,D3				5.07	M8 D2,D3				4.69	M8 D2,D3				3.39	M8 D2,D3
27	1.63	8.91	1.63	*FA2F1G2S(6)1		1.76	9			2.76	9.11	2.26111	FA2F1G2S(6)1		1.2	8.91				0.62	8.94				0.28	8.73				0.3	9.07
																				0.65	9				0.32	8.81				0.42	9.15
28	0.72	9.02				3.19	9.2
			0.11	A2F1G2S(6)2								0.11	A2F1G2S(6)2		0.68	9.04				0.37	9.12				0.39	8.98				0.3	9.32
			0.165556	A3G3S(6)1								0.165556	A3G3S(6)1
			0.123333	FA2BF2G2								0.123333	FA2BF2G2				0.123333	FA2BF2G2				0.123333	FA2BF2G2				0.123333	FA2BF2G2				0.15	FA2BF2G2
			0.1	FA3F2G2								0.1	FA3F2G2				0.12	FA3F2G2				0.12	FA3F2G2				0.396667	FA3F2G2				0.15	FA3F2G2
29	2	9.11	0.74	FA2F1G2S(6)1						0.74	9.27	0.74	FA2F1G2S(6)1
																	0.436667	FA3F1G3				0.12	FA3F1G3
			0.01	FA3F2G2S(6)1								0.01	FA3F2G2S(6)1							1.23	9.27
30	0.44	9.25				0.38	9.31			0.65	9.42				0.57	9.21									0.47	9.06				0.34	9.4
			0.44	FA2BF2G2								0.65	FA2BF2G2				0.57	FA2BF2G2				1.23	FA2BF2G2				0.47	FA2BF2G2				0.34	FA2BF2G2
															4.45	9.43				0.31	9.38				4.3	9.29				3.92	9.63
31	0.84	9.34	1.59	*FA2G2S(3)2						0.54	9.53	0.2	FA2G2S(6)2
			0.35	*A3F2G2S(6)1								0.2	A3F2G2S(6)1														0.13	FA3BF2G2				0.13	FA3BF2G2
			0.15	A3G2Lac2								0.15	A3G2Lac2				0.15	A3G(4)2Lac2
						1.38	9.43										0.31	A4G(3)3				0.31	A4G(3)3
32	4.51	9.46	0.07	*FA2F1G2S(6)1						10.15	9.64	1.25	FA2F1G2S(6)1							4.5	9.49
			0.173333	*A3G3S(6)1								3.66	A3G3S(6)1
			0.07	*A3F1G3S(6)1								1.25	A3F1G3S(6)1
			0.13	FA3F2G3								0.13	FA3F2G3				0.13	FA3F2G3				0.13	FA3F2G3
			0.13	FA3BF2G3								0.13	FA3BF2G3				0.13	FA3BF2G3				0.13	FA3BF2G3
			3.73	M9								3.73	M9				3.73	M9				4.24	M9				4.17	M9				3.79	M9
33	2.93	9.54				3.63	9.65			1.57	9.74				0.74	9.65				0.45	9.66				0.12	9.46				0.12	9.8
			1.47	*FA2F1G2S(3)1								0.45	FA2F1G2S(6)1
			0.09	FA2BG2S(6)2								0.09	FA2BG2S(6)2
			0.58	FA2BF3G2								0.58	FA2BF3G2				0.58	FA2BF3G2				0.45	FA2BF3G2				0.12	FA2BF3G2				0.12	FA2BF3G2
			0.79	*FA3G3S(6)1								0.45	FA3G3S(6)1
34	0.27	9.71				0.62	9.79			0.66	9.9
35	0.78	9.81	0.78	*A2BG2S(6)2		0.92	9.9			0.95	10.02	0.95	A2BG2S(6)2		0.53	9.8				0.57	9.84				0.53	9.64				0.38	9.99
																						0.57	FA2F3G2GlcNAc1				0.53	FA2F3G2GlcNAc1				0.38	FA2F3G2GlcNAc1
36	0.96	10.03	0.71	A3F1G3S(6)1		1.04	10.14			0.71	10.11	0.71	A3F1G3S(6)1		1.9	10.02				0.18	9.93				0.24	9.84				0.16	10.18
																	0.16	A4BG(4)4Lac1		0.64	10.06
37	1.09	10.12	1.34	FA4G4		1.65	10.26			3.75	10.27	2.67	FA4G4				1.9	*FA4G(3)4				0.82	FA4G(3)4
															1.46	10.14				0.6	10.23				0.37	10.04				0.1	10.3
38	0.91	10.22				1.36	10.37			1.29	10.35
												1.46	A3F3G3				1.46	A3F3G3				0.6	A3F3G3				0.37	A3F3G3				0.33	A3F3G3
			0.91	A4G3S(6)1								0.91	A4G3S(6)1																	0.23	10.38
39	0.13	10.35				0.63	10.47			0.43	10.53	0.43	FA2F3G2Lac1		0.35	10.29	0.35	FA2F3G2Lac1		0.15	10.39				0.3	10.37
										0.28	10.57
40	0.23	10.4								0.61	10.79
																				0.39	10.59
															0.27	10.54
41	1.5	10.65	1.5	A2G2S(6)2		2.02	10.8			3.5	10.91	1.5	A2G2S(6)2
																				0.11	10.68
												0.58	FA3F1G3S(6)2
42	0.75	10.81	0.01	FA3G3S(6)2		0.93	10.94					0.01	FA3G3S(6)2		0.19	10.79				0.25	10.84				0.21	10.64
			0.74	*A3G3S(6)2								1.41	A3G3S(6)2
43	0.22	10.95	0.02	A3G3S(6)2		0.47	11.13			0.3	11.24	0.05	A3G3S(6)2		0.26	11.19				0.06	11.01				0.24	10.87
			0.02	A3F3G3S(6)1								0.05	A3F3G3S(6)1
			0.02	FA3BG3S(6)2								0.0466667	FA3BG3S(6)2
			0.16	A4BG4Lac1S(6)1								0.16	A4BG4Lac1S(6)1
44	5.15	11.09	0.53	*FA2F3G2Lac1S(3)1		5.5	11.25			0.98	11.37	0.07	FA2F3G2Lac1S(6)1
			3.1	*A3G3S(3)3								0.3	A3G3S(6)3
			0.76	*A3F1G3S(3,3)2								0.303333	A3F1G3S(6)2
			0.76	*A3F2G2S(3,3)2								0.3	A3F2G2S(6)2
45	0.3	11.25													0.7	11.36									0.09	11.26
						1.48	11.52
46	0.74	11.38	0.74	A4G4Lac2						1.29	11.58	1.29	A4G4Lac2				0.7	A4G(4)4Lac2
47	5.31	11.51	3.36	*A3G3S(3)3		5.72	11.67			0.55	11.69	0.55	A3G3S(6)3		0.49	11.46									0.17	11.4
			1.46	A3F3G3S(3)2						0.21	11.95
			0.49	FA4BF4G1								0.21	FA4BF4G1				0.49	FA4BF4G1				0.06	FA4BF4G1				0.17	FA4BF4G1
										0.39	12.21
48	3.56	11.93				3.98	12.09			0.16	12.45				0.25	11.8									0.25	11.64
			2.46	*A3G3S(3)4								0.025	A3G3S(6)4
			0.34	*FA3G3S(3)3								0.02	FA3G3S(6)3
			0.665	*A3F1G3S(3)3								0.02	A3F1G3S(6)3
			0.095	A4G4Lac2S(6)1								0.095	A4G4Lac2S(6)1
49	1.39	12.33	1.39	*FA3F1G3S(3,6,6)3		1.58	12.48			0.81	12.8	0.81	FA3F1G3S(6)3		0.69	12.57									0.11	12.2
50	0.57	12.49				0.82	12.65
51	0.6	12.78				0.69	12.94			0.2	12.89				0.08	12.76
										0.13	13.26				0.02	12.93
52	0.24	12.96				0.37	13.13			0.67	13.83
53	0.36	13.18				0.52	13.37								0.08	13.36
54	0.14	13.56				0.27	13.55			0.12	14.14				0.29	13.62
										0.06	14.19				0.19	13.71
55	0.16	13.71				0.48	13.9			0.2	14.67				0.33	14.74
56	0.11	14.07				0.52	13.98			0.29	14.89
Sum	100		96.9917			99.98				99.99		96.8			100.03		95.14			100		98.7933			99.99		95.875			100.02		97.4933
*=Major link

## Sheet: Membrane CTRL
MEM CTRL		UND				JBM				NAN1					ABS					ABS+SPG					ABS+BTG					ABS+BTG+GUH
Peak number	% Area	GU	%area	Glycan		% Area	GU	Glycan		% Area	GU	%area	Glycan		% Area	GU	%area	Glycan		% Area	GU	%area	Glycan		% Area	GU	%area	Glycan		% Area	GU	%area	Glycan
1	16.85	4.09				26.75	4.14			0.07	4.04				15.93	4.11				14.88	4.13				15.61	4.13				0.09	4.06					UND	NAN1	ABS	ABS+SPG	ABS+BTG	ABS+BTG+GUH
			16.47	junk						16.63	4.16	16.63	junk				15.61	junk				14.5	junk				15.61	junk		13.9	4.18	13.9	junk		high mannose	22.22	25.925	22.8333	23.27	25.52	45.63	27.5664
			0.38	M3		0.33	4.32			0.45	4.28	0.45	M3		0.06	4.3	0.38	M3				0.38	M3		0.43	4.25	0.43	M3		7.06	4.32	7.06	M3		fucosylated high mannose	2.1025	2.5925	2.11	2.09	1.99	11.8	2.177	29.7434	total high mannose			BRANCHING
2	0.03	4.4				0.01	4.43			0.03	4.37				0.03	4.41				0.19	4.44				0.02	4.36				0.16	4.41				A1							0					A1= 1 antenna
3	0.01	4.48				0.11	4.46			0.11	4.5				0.01	4.49									0.03	4.48				0.08	4.55				FA1	0.1	0.1	0.1	0.1	0.1	0.01	0.1					A2 =2 antennas
																																			A1B	0.04	0.06	0.04	0.04	0.27		0.09		total			A3 =3 antennas
																																			FA1B	0.13	0.176667	0.13	0.13	0.13	0.02	0.139333	0.329333	monoantennary			A4 =4 antennas
4	0.84	4.66				0.04	4.65			0.06	4.66				0.03	4.62				0.93	4.69				0.05	4.62				0.08	4.67				A2	3.02333	3.33333	2.8	3.23	1.28		2.73333
						0.03	4.7			0.87	4.75				0.81	4.68									0.81	4.72				27.33	4.79	17.33	M3B/A1		FA2	1.96333	2.52667	1.65	2.34	1.57	0.02	2.01
			0.81	FM3		0.04	4.73					0.87	FM3				0.81	FM3				0.93	FM3				0.81	FM3				10	FM3		A2B	1.17	1.42	0.84	1.06	1.21	0.05	1.14
5	8.02	4.78	8.02	junk		12.72	4.85			7.34	4.88	7.34	junk		7.43	4.8	7.43	junk		7.05	4.83	7.05	junk		7.83	4.84	7.83	junk		5.79	4.91	5.79	junk		FA2B	0.76	1.04	0.73	0.69	0.5	0.01	0.744	6.62733	biantennary
																				0.03	5.01				0	5.01				0.64	5.17				A3	3.64417	3.20417	2.32	2.43	2.3	0.13	2.77967
6	0.07	5.04				0.06	5.05			0.03	5.05				0.02	5.03				0.12	5.09				0.05	5.08									FA3	3.2325	3.18667	3.225	3.78	3.61	0.02	3.40683
						0.1	5.14			0.11	5.15				0.06	5.06																			A3B	0.1	0.1	0.14	0.24	0.1		0.136
															0.01	5.17																			FA3B	0.83	0.83	0.83	0.52	0.51	0.09	0.704	7.0265	triantennary
7	0.25	5.22				0.05	5.24			0.03	5.26				0.22	5.25				2.76	5.33				0.37	5.29				0.63	5.28	0.64	M4		A4	1.33	0.94	1.33	1.05	1		1.13
																																0.62	FM3B		FA4	0.38	0.42	0.19	0.85	0.23	0.2	0.414
						0.18	5.33			0.13	5.35																								A4B	0.24	0.57	0.57	0.566667	0.16		0.421333
																											0.1	FA1				0.01	FA1		FA4B	0.41	0.41	0.41	0.73	0.41	0.41	0.474	2.43933	tetranantennary
						0.07	5.4			0.03	5.41																0.27	A1B							Lac-total	1.91	1.38	1.76	1.54	1.21		1.56
						0.08	5.5			0.01	5.44				0.05	5.32									1.25	5.36				0.01	5.44				OAF-total	10.308	9.22367	10.8417	8.06167	8.04917	7.74333	9.03792
																											1.28	A2		0.01	5.49				junk	40.57	40.065	38.77	38.59	45.61	30.56
																														0.01	5.53				sum	94.4638	97.5037	91.62	91.3083	95.7592	96.6933
8	10.06	5.55				15.21	5.62			0.01	5.51				0.03	5.44				0.07	5.42				0.03	5.48				0.01	5.58					94.4638	97.5037	91.62	91.3083	95.7592	96.6933
										9.44	5.64				9.4	5.56				8.61	5.59				9.76	5.61				8.17	5.69
																																3	A1F1		Total core fucose	14.9283	16.3225	14.9	14.695	12.25	15.4608	14.7594
																																			Total bisects	6.04333	6.93667	7.32667	6.03333	5.59917		6.38783
			10.06	junk								9.44	junk				9.4	junk				8.61	junk				9.76	junk				5.17	junk
9	0.43	5.75				1.23	5.81			0.53	5.87				0.54	5.75				3.7	5.8				1.34	5.77	0.13	FA1B		0.07	5.82	0.02	FA1B
																											1.21	A2B				0.05	A2B
10	0.08	5.86				0.25	5.92			0.17	5.95				0.17	5.87				0.05	5.9	0.05	A3		4	5.83	2.3	A3		0.13	5.88	0.13	A3
11	0.02	5.92				0.44	6																				1.57	FA2		0.02	5.92	0.02	FA2
																																			Lac:	UND	NAN1	ABS	ABS+SPG	ABS+BTG
																																			A2Lac
12	0.03	6.01				0.08	6.14			0.03	6.14				0.03	5.99	0.1	FA1G(3)1		6.06	6.19	0.1	FA1G(3)1		9.21	6.22	0.1	A3B		0.11	6.01	0.05	A1BF1		FA2Lac	0.14	0.14	0.14	0.14	0.14
																						1.5	A2F1				1.5	A2F1				0.02	A2F1		A3Lac
															0.03	6.02											0.5	FA2B				0.01	FA2B		A4Lac	1.52	1.09	1.25	0.76	0
																						2.93	FA3				3.61	FA3				0.02	FA3		FA4Lac
																																			A4BLac	0.25	0.15	0.37	0.31	0.31
13	1.03	6.1				0.16	6.16			1.04	6.21				1.13	6.11														0.04	6.04				total	1.91	1.38	1.76	1.21	0.45
										0.11	6.27																			0	6.08
																														0.01	6.12				OAF:	UND	NAN1	ABS	ABS+SPG	ABS+BTG
																											0.63	M4A1		0.02	6.15				A1BF	0.31	0.31	0.31	0.31	0.3125
			1.03	M5		0.32	6.23			0.06	6.33	1.04	M5				1.03	M5				4	M5				3	M5		1.56	6.25	1.56	M5		FA1BF	0.01	0.01	0.03	0.03	0.03
14	0.04	6.21	0.04	A1BG1		0.33	6.29			0.06	6.37	0.06	A1BG1		0.17	6.26	0.04	A1BG(3)1		2.61	6.32	0.04	A1BG(3)1							0.02	6.34				A2F	1.87	1.88167	1.95	1.88	1.65
																																			FA2F	1.56333	1.56333	0.925	1.235	1.16
																						0.1	A3B							0.01	6.38				A2BF	0.43	0.476667	0.43	0.43	0.43
15	3.45	6.33	0.06	A2G1		5.35	6.39			3.35	6.43	0.04	A2G1		3.27	6.34	0.06	A2G(3)1		3.44	6.37	0.05	A2G(3)1		3.39	6.39				2.78	6.48				FA2BF	0.813333	0.773333	1.18667	0.976667	0.95
			3.39	junk						0.04	6.5	3.35	junk				3.21	junk				3.39	junk				4.68	junk				2.78	junk		A3F	2.62133	1.45867	2.57	1.9	2.4
16	0.44	6.48	0.13	FA1BG1		0.87	6.54			0.53	6.59	0.176667	FA1BG1		0.39	6.49	0.13	FA1BG(3)1		1.16	6.5	0.13	FA1BG(3)1		3.73	6.52				1.18	6.68				FA3F	2.14	2.14	2.13	1	0.84
			0.13	A2BF1								0.176667	A2BF1				0.13	A2BF1				0.13	A2BF1				0.13	A2BF1				0.09	A2BF1		A3BF	0.01	0.01	0.01	0.01	0.01
			0.13	A3F1								0.176667	A3F1				0.13	A3F1				0.9	A3F1				1.31	A3F1				0.09	A3F1		FA3BF	0.0833333	0.0833333	0.0833333	0.0833333	0.08
																																			A4F
17	0.26	6.58	0.2	FM5		0.13	6.62			0.36	6.69	0.2	FM5		0.5	6.59	0.2	FM5		2.32	6.62	0.2	FM5		1.03	6.63	0.52	FM5				1.18	FM5		FA4F
			0.02	A2BG1								0.02	A2BG1				0.02	A2BG(3)1				0.02	A2BG(3)1												A4BF	0.186667	0.186667	0.186667	0.206667	0.186667
			0.02	A3G1								0.12	A3G1				0.3	*A3G(3)1				1.31	A3G(3)1												FA4BF	0.27	0.33	1.03
																																			total	10.308	9.22367	10.8417	8.06167	8.04917
			0.02	FA3B								0.02	FA3B				0.02	FA3B				0.51	FA3B				0.51	FA3B				0.09	FA3B
18	0.03	6.66				0.44	6.73			0.03	6.78				0.03	6.69						0.28	A4				1	A4		0.18	6.79
																														0.09	6.84				Galactosylation	UND	NAN1	ABS
19	0.02	6.68								0.02	6.8				0.04	6.72				2.65	6.75				0.16	6.79	0.16	A4B		0.02	6.89				G0	23.0833	27.4217	24.3067	24.9372	no galactose
20	0.01	6.73	0.01	FA2G1		0.04	6.79			0.01	6.83	0.01	FA2G1		0.01	6.75	0.01	*FA2G(3)1				1.33	FA2G(3)1												G1	4.09917	4.42583	4.28667	4.27056	1 galactose
			0.01	FA2BG1								0.01	FA2BG1				0.01	*FA2BG(3)1				0.33	FA2BG(3)1							0.03	6.96				G2	12.4767	13.6183	10.6617	12.2522	2 galactoses
21	0.53	6.87	0.31	A1BF1G1		1.56	6.94			0.01	6.92	0.31	A1BF1G1		0.6	6.88	0.31	A1BF1G1		1.6	6.9	0.31	A1BF1G1		1.78	6.94	0.3125	A1BF1G1		1.32	7.09	0.3125	A1BF1G1		G3	11.6847	9.58283	10.725	10.6642	3 galactoses
			0.01	A2F1G1						0.56	6.98	0.01	A2F1G1				0.01	A2F1G1				0.01	A2F1G1				0.01	A2F1G1				0.01	A2F1G1		G4	2.69	2.23	2.87	2.59667	4 galactoses
			0.01	A3BF1								0.01	A3BF1				0.01	A3BF1				0.01	A3BF1				0.01	A3BF1				0.01	A3BF1		beta1-3				9.7
			0.2	FA4								0.24	FA4				0.01	FA4				0.64	FA4				0.23	FA4				0.2	FA4		beta1-4				6.24
																	0.27	*M4A1G(3)1				0.63	M4A1G(3)1									0.7875	FA1F1G1		both				1.66
																											0.53	M5A1							total G				28.2633
22	4.62	7.01	0.91	M6D3		0.18	7.04			4.77	7.12	0.91	M6D3		4.6	7.02	0.91	M6D3		5.44	7.04	0.91	M6D3		4.77	7.07	0.91	M6D3		6.21	7.17	1.66	M6D3
			1.54	M6D1								1.54	M6D1				1.54	M6D1				1.54	M6D1				1.54	M6D1				2.07	M6D1		Sialylation	UND
			1.54	junk								2.32	junk				2.15	junk				3.98	junk				6.35	junk				2.07	junk		S0	34.3233				no sialic acid
23	2.18	7.05	2.18	A2G2		3.69	7.13			2.3	7.16	2.3	A2G2		2.78	7.09	2.74	*A2G(3)2		3.22	7.12	3.18	A2G(3)2		3.99	7.13									S1	9.39917				1 sialic acid
																	0.04	A3BG(3)1				0.04	A3BG(3)1												S2	6.80133				2 sialic acids
																																			S3	2.79				3 sialic acids
						0.08	7.21			0.04	7.33																0.41	FA4B				0.41	FA4B		S4	0.54				4 sialic acids
24	0.72	7.29	0.01	FA1BF1G1		0.14	7.31			0.93	7.41	0.01	FA1BF1G1		1.15	7.31	0.03	FA1BF1G1		0.51	7.27	0.03	FA1BF1G1		0.85	7.36	0.03	FA1BF1G1		0.06	7.36	0.06	FA1BF1G1		alpha2-3	7.37417				total 2-3 linked
																				1.56	7.35									0.38	7.45				alpha2-6	11.4463				total 2-6 linked
			0.02	A3F1G1								0.02	A3F1G1				0.02	A3F1G1				0.02	A3F1G1				0.03	A3F1G1				0.03	A3F1G1		both	0.71
			0.41	A2BG2								0.62	A2BG2				0.82	*A2BG(3)2				1.04	A2BG(3)2												total S	19.5305				total sialylation
			0.28	FA2F1G1		1.16	7.35					0.28	FA2F1G1				0.28	FA2F1G1				0.28	FA2F1G1				0.79	FA2F1G1				0.35	FA2F1G1
25	0.09	7.39				0.14	7.47			0.12	7.46				0.19	7.39	0.19	A4G(3)1				0.19	A4G(3)1		1.2	7.5				0.05	7.54
						0.09	7.51			0.06	7.5
26	0.76	7.49	0.01	FA2G2		1.06	7.58			1.55	7.62	0.8	FA2G2		2.39	7.51	1.64	*FA2G(3)2		1.76	7.5	1.01	FA2G(3)2							0.11	7.57
			0.75	M6A1								0.75	M6A1				0.75	M6A1				0.75	M6A1				0.75	M6A1
										0.08	7.69
																														0.08	7.61
																									1.36	7.65
27	2.87	7.65	0.1	FA1G1S(6)1		3.68	7.72			4.1	7.78	0.1	FA1G1S(6)1		4.78	7.67	0.53	M5A1G(3)1		2.6	7.69	0.53	M5A1G(3)1							0.04	7.74
			1.27	A2F1G2								1.33	A2F1G2				1.57	A2F1G2												0.24	7.81
			0.48	FM5A2								0.92	FM5A2				0.92	FM5A2				0.78	FM5A2				0.66	FM5A2
			0.24	FA2BG2								0.6	FA2BG2				0.6	*FA2BG(3,4)2				0.24	FA2BG(3)2
			0.29	FA2BF1G1								0.29	FA2BF1G1				0.29	FA2BF1G1				0.29	FA2BF1G1				0.19	FA2BF1G1				0.06	FA2BF1G1
			0.37	A3G2								0.37	A3G2				0.37	A3G(3)2				0.37	A3G(3)2
			0.24	FA3G2								0.24	FA3G2				0.25	FA3G(3)2				0.25	FA3G(3)2
			0.19	FA3F1G1								0.19	FA3F1G1				0.19	FA3F1G1				0.19	FA3F1G1				0.65	FA3F1G1				0.18	FA3F1G1
			0.06	A4BG1								0.06	A4BG1				0.06	A4BG(3)1				0.06	A4BG(3)1
																											0.31	A4BG1GlcNAc1
28	1.1	7.77	0.01	FA2BG2		1.57	7.84			1.12	7.89	0.135	FA2BG2		1.09	7.79	0.12	FA2BG(3)2		1.18	7.83	0.12	FA2BG(3)2		1.38	7.83				0.07	7.85
			1.09	junk								0.985	junk				0.97	junk				1.06	junk				1.38	junk		0.78	7.94	0.85	junk
29	4.72	7.88	2.04	M7 D3		0.22	7.91			4.93	8.01	2.145	M7 D3		4.51	7.91	2.255	M7 D3		4.54	7.93	2.27	M7 D3		4.31	7.95	2.155	M7 D3		4.05	8.06	2.025	M7 D3
						0.21	7.94
			0.01	A3F1G1S(6)1								0.01	A3F1G1S(6)1
			0.63	M4A1G1S(6)1								0.63	M4A1G1S(6)1
			2.04	M7 D1		0.11	8					2.15	M7 D1				2.255	M7 D1				2.27	M7 D1				2.155	M7 D1				2.025	M7 D1
30	0.3	7.98	0.19	A4G1S(6)1		0.32	8.09			0.32	8.12	0.32	A4G1S(6)1		0.26	8.01				1.17	8.11				1.14	8.08				0.13	8.17
31	0.45	8.05	0.45	FM5A2G1		0.36	8.14			0.44	8.2	0.44	FM5A2G1		0.46	8.09														0.1	8.22
																														0.14	8.25
32	0.02	8.13	0.01	FA2G2S(6)1		0.06	8.19			0.04	8.26	0.01	FA2G2S(6)1		0.09	8.11
			0.01	FA2F1G2								0.0133333	FA2F1G2				0.275	FA2F1G2				0.585	FA2F1G2
			0.01	FA3G3								0.466667	FA3G3				0.275	*FA3G3				0.59	FA3G3
						0.03	8.22
33	1.57	8.25				0.14	8.29			2.02	8.41				0.41	8.21	0.41	*FA4BG(3)3		0.73	8.24	0.73	FA4BG(3)3		0.97	8.25				0.32	8.39
															1.99	8.31				1.25	8.33				0.4	8.33				0.11	8.46
			1.54	FA2G2S(6)1								1.54	FA2G2S(6)1
			0.03	A3G3								0.03	A3G3				0.55	A3G(4,4,3)3
																	0.55	A3G(3)3				0.7	A3G(3)3
																	0.55	A3G(4)3
						1.27	8.34										0.18	FM5A2G(3)1				0.18	FM5A2G(3)1
34	0.6	8.37	0.37	A2F2G2		0.56	8.45			0.21	8.5	0.105	A2F2G2		0.37	8.38	0.37	A2F2G2				0.37	A2F2G2		0.14	8.46	0.14	A2F2G2		0.01	8.54	0.14	A2F2G2
																														0.13	8.57
			0.23	*FA2BG2S(3)1								0.105	FA2BG2S(6)1
35	0.9	8.47				0.87	8.55			0.54	8.63				0.71	8.51				1.18	8.53				0.76	8.55				0.61	8.67
										0.09	8.67											0.3	A4BG(3)2				0.76	A4G2GlcNAc2
36	0.18	8.57	0.0433333	A2G2S(6)1		0.31	8.64			0.55	8.71	0.413333	A2G2S(6)1		0.66	8.58				0.43	8.63				0.42	8.7				0.18	8.79
			0.3	A2BF2G2								0.3	A2BF2G2				0.3	A2BF2G2				0.3	A2BF2G2				0.3	A2BF2G2				0.3	A2BF2G2
			0.05	A3BG3								0.05	A3BG3				0.1	A3BG(3)3				0.1	A3BG(3)3
			0.0433333	FA3BF3								0.0433333	FA3BF3				0.0433333	FA3BF3				0.0433333	FA3BF3				0.04	FA3BF3				0.04	FA3BF3
37	9.75	8.72	0.3	FA2F2G2		1.62	8.75			3.32	8.84	0.3	FA2F2G2		2.7	8.7	0.3	FA2F2G2		6.23	8.78	0.3	FA2F2G2		8.05	8.8	0.3	FA2F2G2		7.16	8.93	0.3	FA2F2G2
			0.0433333	FA2BF2G2						9.06	8.88	0.0433333	FA2BF2G2		8.12	8.76	0.516667	FA2BF2G2				0.286667	FA2BF2G2				0.38	FA2BF2G2				0.38	FA2BF2G2
			0.1	FA2BG2S(6)1								0.1	FA2BG2S(6)1
			0.1	FA2BF1G1S(6)1								0.1	FA2BF1G1S(6)1
			0.01	A3F2G2								0.4	A3F2G2				0.01	A3F2G2				0.01	A3F2G2				0.13	A3F2G2				0.13	A3F2G2
			0.01	A3F1G3								0.01	A3F1G3				0.01	A3F1G3				0.01	A3F1G3
																	2.7	*FA3G(4)3				0.01	FA3G(3)3
																											0.04	FA3BF2G2				0.04	FA3BF2G2
			0.01	FA3G2S(6)1								0.01	FA3G2S(6)1
			0.01	FA3F1G1S(6)1								0.01	FA3F1G1S(6)1
			0.53	M5A1G1S(6)1								0.53	M5A1G1S(6)1
			0.33	FA3BG3								0.57	FA3BG3				0.81	*FA3BG(4)3				0.01	FA3BG(3)3
			7.28	M8 D2,D3								10.05	M8 D2,D3				7.82333	M8 D2,D3				5.59	M8 D2,D3				7.28	M8 D2,D3				6.39	M8 D2,D3
38	1.41	8.9	0.08	FA2F1G2S(6)1		0.06	8.93			0.16	9	0.08	FA2F1G2S(6)1		1.59	8.96	0.07	FA2F2G2		0.5	8.96	0.07	FA2F2G2		0.38	8.97	0.07	FA2F2G2		0.4	9.1	0.2	FA2F2G2
			0.92	A3G3S(6)1								0.92	A3G3S(6)1
			0.41	FA4BG3S(6)1								0.41	FA4BG3S(6)1				0.12	A3F2G3				0.12	A3F2G3
						1.18	9.01			2.34	9.07
39	0.98	9	0.21	A2F1G2S(6)2		0.5	9.08					0.426667	A2F1G2S(6)2
			0.19	FA2BF2G2								0.19	FA2BF2G2				0.19	FA2BF2G2		0.62	9.04	0.21	FA2BF2G2		0.56	9.21	0.19	FA2BF2G2				0.0666667	FA2BF2G2
			0.206667	A3G3S(6)1								0.426667	A3G3S(6)1
			0.19	FA3F2G2								0.19	FA3F2G2				0.19	FA3F2G2				0.21	FA3F2G2				0.19	FA3F2G2				0.0666667	FA3F2G2
			0.186667	A4BF2G1								0.186667	A4BF2G1				0.186667	A4BF2G1				0.206667	A4BF2G1				0.186667	A4BF2G1				0.19	A4BF2G1
40	0.58	9.07	0.02	FA2F1G2S(6)1		0.73	9.17			0.66	9.22	0.36	FA2F1G2S(6)1		0.56	9.1				0.32	9.11									0.27	9.19
			0.56	A4G4								0.3	A4G4				0.56	A4G(4)4		0.92	9.27
41	0.42	9.22	0.05	A2G2S(6)2		0.14	9.29			0.25	9.37	0.05	A2G2S(6)2		0.77	9.26						1.09	A4G(3)3GlcNAc2		0.73	9.31				0.21	9.35
			0.19	FA2BF2G2								0.15	FA2BF2G2				0.19	FA2BF2G2				0.19	FA2BF2G2				0.19	FA2BF2G2				0.21	FA2BF2G2
			0.05	A3BG3S(6)1		0.41	9.31					0.05	A3BG3S(6)1
42	1.15	9.32	0.383333	*FA2G2S(3)2		1.14	9.44			0.47	9.39	0.156667	FA2G2S(6)2							5	9.5				0.13	9.45				0.26	9.43
			0.383333	A3F2G2S(3)1													0.58	A4G(3)3				0.58	A4G(3)3
			0.383333	*FA2F2G2S(6)1								0.16	FA2F2G2S(6)1																	0.06	9.51
												0.16	A3F2G2S(6)1																	0.05	9.56
43	5.82	9.43	0.3075	A3G3S(3)1						6.46	9.6				5.17	9.49									5.61	9.53				5.01	9.67
			0.18	FA2F1G2S(6)1								0.18	FA2F1G2S(6)1
			0.1625	FM5A2G1S(6)1								0.1625	FM5A2G1S(6)1									0.14	FA2F3G2GlcNAc1				0.14	FA2F3G2GlcNAc1				0.14	FA2F3G2GlcNAc1
												0.3075	A3G3S(6)1
			0.04	FA3F2G3								0.04	FA3F2G3				0.04	FA3F2G3				0.04	FA3F2G3
			0.04	FA3BF2G3								0.04	FA3BF2G3				0.04	FA3BF2G3				0.04	FA3BF2G3
			5.09	M9		0.75	9.64					5.73	M9				5.09	M9				4.4	M9				6.14	M9				4.87	M9
44	0.73	9.5								0.39	9.69											0.31	A4BG(3)4GlcNAc1
			0.1825	*FA3G3S(6)1								0.1	FA3G3S(6)1
			0.17	*FA2F1G2S(6)1								0.09	FA2F1G2S(6)1
			0.17	*FA2BG2S(6)2								0.09	FA2BG2S(6)2
			0.17	*A3G2S(6)2								0.09	A3G2S(6)2
45	0.69	9.58				0.46	9.77			0.53	9.84				0.58	9.72									0.13	9.69				0.1	9.85
			0.69	*A2G2S(6)2								0.53	A2G2S(6)2																	0.06	9.87
46	0.74	9.76	0.74	A2BG2S(6)2		0.58	9.88			0.05	9.89	0.78	A2BG2S(6)2		0.37	9.87	0.37	A4BG(4)4Lac1		0.56	9.83				0.56	9.88				0.13	9.98
										0.73	9.96				0.2	9.92														0.13	10.04
																														0.09	10.09
47	0.88	10	0.09	A3F1G3S(6)1		0.96	10.09			0.54	10.06	0.09	A3F1G3S(6)1		0.2	9.97				0.62	10.06				0.36	10.07				0.02	10.17
			0.18	A4BG4						2.2	10.19	0.51	A4BG4		2.2	10.07	0.51	*A4BG(3,3,4,4)4				0.206667	A4BG(3)4							0.1	10.23
			0.18	FA4G4								0.18	FA4G4				0.18	*FA4G(3)4				0.21	FA4G(3)4
												1.71	FA3F1G3				1.71	FA3F1G3				0.56	FA3F1G3							0.05	10.26
			0.58	*A4G3S(6)1								0.32	A4G3S(6)1																	0.02	10.34
			0.01	FA2G2S(6)2								0.01	FA2G2S(6)2
			0.01	A2F1G2S(6)2								0.01	A2F1G2S(6)2
48	2.15	10.16								2.3	10.32	0.04	FA2F3G2Lac1		2.42	10.2	0.14	FA2F3G2Lac1		0.84	10.24				0.93	10.28				0.49	10.43
																	2.28	A3F3G3				0.84	A3F3G3				0.93	A3F3G3				0.49	A3F3G3
			0.95	A3F2G3S(3)1
			1.2	FA3G3S(6)2		1.44	10.24					2.3	FA3G3S(6)2
49	0.28	10.28								0.09	10.43																			0.02	10.54
										0.15	10.46
50	0.19	10.38								0.27	10.54				0.25	10.42				0.11	10.43
			0.19	A3G3S(6)2								0.27	A3G3S(6)2							0.11	10.48
51	1.33	10.6	1.33	*FA3G3S(3)2		0.78	10.75			0.07	10.64	0.07	FA3G3S(6)2		0.4	10.57				0.25	10.57
										0.17	10.67									0.09	10.72
52	0.96	10.77	0.48	*FA3BG3S(3,3)2		0.69	10.91			0.28	10.85	0.24	FA3BG3S(6)2		0.31	10.84
			0.48	*A3G3S(3,6)2								0.24	A3G3S(6)2
										0.17	10.95
										0.03	11
53	0.31	10.94				0.36	11.07			0.03	11.1				0.17	10.99
			0.06	A3F3G3S(6)1						0.06	11.14	0.06	A3F3G3S(6)1
			0.25	*A4BG4Lac1S(6)1						0.15	11.19	0.15	A4BG4Lac1S(6)1
54	0.69	11.04	0.138	*A3F1G3S(6)2		0.34	11.22			0.51	11.29	0.102	A3F1G3S(6)2		0.24	11.17
			0.14	*A3F2G2S(6)2								0.1	A3F2G2S(6)2
			0.14	*FA2F3G2Lac1S(6)1								0.1	FA2F3G2Lac1S(6)1
			0.14	*FA2F2G2S(6)2								0.1	FA2F2G2S(6)2
			0.14	*A3G3S(6)3								0.1	A3G3S(6)3
55	1.15	11.32				0.62	11.46			0.49	11.45				1.25	11.4
			1.15	A4G4Lac2						0.6	11.52	1.09	A4G4Lac2				1.25	A4G(4)4Lac2
56	0.81	11.45	0.27	A3G3S(6)3		0.57	11.56			0.99	11.62	0.33	A3G3S(6)3		1.03	11.49
			0.27	A3F3G3S(6)2								0.33	A3F3G3S(6)2
			0.27	FA4BF4G1								0.33	FA4BF4G1				1.03	FA4BF4G1
57	0.54	11.78				0.38	11.9								0.25	11.84
			0.54	A3G3S(3)4
58	1.19	11.97	0.26	FA3G3S(3)3		0.75	12.05								0.19	11.89
			0.37	A4G4Lac2S(3)1
			0.41	A3F1G3S(3)3
59	0.36	12.25	1.71	FA3F1G3S(3)3		0.21	12.37								0.29	12.35
60	0.87	12.47				0.43	12.6								1.3	12.6
61	0.48	12.7				0.36	12.86								0.29	12.86
62	0.83	13.02				0.64	13.14								0.22	13.13
63	0.39	13.49				0.68	13.87								0.72	13.63
64	0.72	13.67													0.76	13.67
Sum	99.98		94.4638			100.01				99.99		97.5037			99.99		91.62			99.97		91.3083			100.01		95.7592			99.99		96.6933
*=Major link

## Sheet: Membrane Treated
MEM Treated		UND				JBM				NAN1					ABS					ABS+SPG					ABS+BTG					ABS+BTG+BKF					ABS+BTG+GUH
Peak number	% Area	GU	%area	Glycan		% Area	GU	Glycan		% Area	GU	%area	Glycan		% Area	GU	%area	Glycan		% Area	GU	%area	Glycan		% Area	GU	%area	Glycan		% Area	GU	%area	Glycan		% Area	GU	%area	Glycan
1	14.28	4.1				16.53	4.03			0.12	4.05				13.48	4.13				17.88	4.13				13.24	4.13				11.99					0.11	4.08
			14.01	junk						13.77	4.15	13.77	junk				13.48	junk				17.86	junk				13.24	junk				11.99	junk		11.84	4.2	11.84	junk
			0.27	M3		0.28	4.18			0.12	4.33	0.12	M3		0.27	4.26	0.27	M3				0.11	M3		0.11	4.26	0.11	M3		0.6	4.02	0.6	M3		13.95	4.34	13.95	M3
2	0.02	4.34				0.02	4.29			0.02	4.38				0.02	4.32									0.22	4.39				0.11	4.18				0.22	4.45
3	0.06	4.44				0.11	4.35			0.14	4.45				0.65	4.5				0.09	4.45														0.36	4.54
																									0.04	4.51				0.32	4.27
4	0.7	4.68				0.01	4.43			0.07	4.66				0.23	4.63				1	4.69				0.13	4.62									0.08	4.7
						0.18	4.49			0.62	4.75				0.75	4.72									0.66	4.72				0.65	4.38				24.93	4.83	14.93	M3B/A1
																																									UND	NAN1	ABS	ABS+SPG	ABS+BTG	ABS+BTG+BKF	ABS+BTG+GUH
			0.7	FM3		0.01	4.6					0.62	FM3				0.75	FM3				1	FM3				0.66	FM3									10	FM3		high Man	15.73	15.9	15.63	15.98	16.41	19.43	42.1	20.9083
5	6.8	4.81	6.8	junk		8.21	4.7			6.61	4.88	6.61	junk		6.59	4.84	6.59	junk		8.03	4.82	8.03	junk		6.31	4.84	6.44	junk		6.4	4.55	6.4	junk		6.13	4.95	6.13	junk		F high Man	1.46	1.61	1.73	1.63	1.74		11.4	1.6775	22.5858
						0.14	4.86								0.24	4.99				0.11	5.02				0.13	5.05				0.2	4.72				0.7	5.21				A1								0
6	0.09	5.07				0.05	4.96			0.04	5.04				0.27	5.05									0.13	5.12				0.16	4.77									FA1	0.22	0.22	0.22	0.22	0.22		0.39	0.22
										0.08	5.1				0.22	5.13																					0.2	FM3B		A1B	0.44	0.41	0.52	0.54	0.54	1.11		0.624
						0.05	5.03																														0.5	M4		FA1B	0.09	0.09	0.09	0.05	0.08		0.14	0.0775	0.9215
7	0.54	5.24				0.23	5.1			0.03	5.19																								0.39	5.32				A2	6.21	6.64	6.22	5.97	6.65	10		7.096
																																								FA2	4.41	3.39	4.24	2.98	3.35		0.02	3.49
						0.16	5.17			0.35	5.34				0.46	5.3				0.18	5.25	0.02	FA1		0.41	5.29	0.22	FA1		0.35	4.91						0.39	FA1		A2B	0.82	1.25	0.65	1.36	0.96	4	0.05	1.644
			0.4	A1B								0.35	A1B				0.46	A1B				0.18	A1B				0.54	A1B				1.11	A1B		0.05	5.4				FA2B	2.46	2.53	2.5	2.52	2.7		0.28	2.5625	14.7925
										0.1	5.39				0.22	5.39				0.38	5.31				7.65	5.36				10.76	4.98				0.08	5.44				A3	7.16	6.11	5.78	5.79	6.04	9.22	0.04	6.588
																																								FA3	3.95	4.12	2.49	3.12	1.86		0.28	2.8975
			0.14	A2								0.21	A2				0.22	A2				0.38	A2				6.65	A2				10	A2		0.03	5.5				A3B	0.16	0.47	1.9	1.9	1.9	1.3		1.494
										0.11	5.43				0.16	5.43				0.02	5.45				0.22	5.5				0.38	5.09				0.11	5.59				FA3B	1.31	1.36	1.45	1.42	0.64		0.22	1.2175	12.197
8	8.23	5.57				0.11	5.31			0.13	5.52				8.03	5.6				10.26	5.58				7.55	5.6				6.58	5.25				7.7	5.73				A4	0.77	1.25	0.88	1.27	0.68	1.23		1.062
						9.65	5.42			8	5.65																													FA4	0.56	0.56	0.5	0.57	0.23		0.23	0.465
																																								A4B	0.39	0.38	0.38	0.39	0.39	1.49		0.606
																																					2	A1F1		FA4B	1.01	1.01	1.01	1.01	1.1		1.1	1.0325	3.1655
			8.03	junk								8	junk				8.03	junk				3.38	junk				8.55	junk				6.88	junk				5.7	junk		Lac-total	3.22	3.27	3.17	3.85	3.44	3.59		3.464
9	0.75	5.79	0.08	FA1B		0.05	5.54			0.91	5.88	0.08	FA1B		1.1	5.84	0.08	FA1B		1.6	5.78	0.04	FA1B		0.96	5.77	0.08	FA1B		6.86	5.35				0.14	5.84	0.14	FA1B		OAF-total	12.1	12.83	13.03	12.81	11.92	10.245	12.26	12.1825
						1.28	5.6													0.12	5.89				9.47	5.83				5.86	5.39				0.16	5.92				junk	34.12	34.97	33.69	37.54	37.46	30.8	29.5
																						0.26	A2B				0.96	A2B				4	A2B		0.05	5.99	0.05	A2B		sum	96.59	98.37	96.08	100.92	98.31	92.415	98.01
																						4	A3				6.04	A3				9.22	A3		0.04	6.02	0.04	A3			96.59	98.37	96.08	100.92	98.31	92.415	98.01
			0.67	FA2								0.83	FA2		0.08	5.93	1.1	FA2				2.96	FA2				3.35	FA2							0.02	6.08	0.02	FA2
10	0.01	5.91				0.03	5.69			0.28	5.97				0.1	6									10.09	6.21				5.17	5.66				0.03	6.12
11	0.03	5.96				0.15	5.77																												0.07	6.2				Total core fucose	21.77	22.29	22.24	21.22	18.22		19.32	20.8433
																																								Total bisects	11.25	12.17	14.38	16.5	15.18	13.86		13.89
12	0.04	6.05	0.04	A1BF1		0.04	5.88			0.17	6.11	0.17	A1BF1		0.2	6.06	0.2	A1BF1		3.18	6.17	0.1	A1BF1				0.2	A1BF1				0.44	A1BF1				0.63	A1BF1
																																								Lac:	UND	NAN1	ABS	ABS+SPG	ABS+BTG	ABS+BTG+BKF
																																			2.02	6.29				A2Lac						1
13	1.38	6.12								1.64	6.2											1.9	A3B				1.9	A3B				1.3	A3B							A2BLac	0.36	0.36	0.36	0.36	0.36	0.36
			0.4	A2F1		0.11	5.94					0.59	A2F1		1.57	6.15	0.59	A2F1				0.4	A2F1				0.4	A2F1				0.935	A2F1				0.56	A2F1		FA2Lac	0.7	0.96	0.94	1	0.9
										0.14	6.29											1.27	FA2B				2.7	FA2B									0.28	FA2B		A3Lac	0.29	0.39	0.3	0.4	0.4	0.4
																						1.51	FA3				1.86	FA3									0.28	FA3		A4Lac	1.72	0.92	0.88	0.89	0.9	0.9
																						0.5	M4A1				0.5	M4A1				0.5	M4A1				0.9	M5		A4BLac	0.15	0.64	0.69	1.2	0.88	0.93
			0.98	M5		0.29	5.99			0.11	6.32	1.19	M5				0.98	M5				0.9	M5				0.9	M5				1.5	M5							total	3.22	3.27	2.81	3.85	3.44	3.59
14	0.08	6.23				0.37	6.05			0.1	6.36				0.45	6.28	0.22	*FA1G(3)1		4.1	6.36	0.2	FA1G(3)1												0.02	6.38				OAF:	UND	NAN1	ABS	ABS+SPG	ABS+BTG	ABS+BTG+BKF
			0.04	A1BG1								0.06	A1BG1				0.06	*A1BG(3)1				0.36	A1BG(3)1																	A1BF	0.06	0.18	0.21	0.11	0.21	0.44
																																								FA1BF	0.2	0.21	0.21	0.21	0.21
																																			0.04	6.42				A2F	1.11	0.97	0.76	0.57	0.55	1.545
15	3.12	6.35	0.5	A2G1		3.8	6.17			3.17	6.43	0.47	A2G1		3.2	6.38	0.5	*A2G(3)1				0.36	A2G(3)1		2.87	6.38				2.56	5.98				2.58	6.52				FA2F	2.39	3.84	3.75	2.94	2.23
																																								A2BF	0.4	0.4	0.52	0.51	0.77	1.28
			2.62	junk								2.7	junk				2.7	junk				1.37	junk				4.5	junk				2.56	junk				2.58	junk		FA2BF	0.39	0.67	0.68	1.15	1.33
16	0.34	6.5	0.01	FA1BG1		0.45	6.3			0.09	6.53	0.01	FA1BG1		0.63	6.52	0.01	FA1BG(3)1		0.89	6.49	0.01	FA1BG(3)1		3.22	6.51				2.58	6.1				1.66	6.69				A3F	3.03	3.09	2.45	2.49	2.87	3.47
			0.11	FA2G1						0.42	6.57	0.12	FA2G1				0.11	FA2G(4)1																						FA3F	1.13	0.69	0.87	0.68	0.27
			0.2	A2BF1								0.2	A2BF1				0.32	A2BF1				0.31	A2BF1				0.57	A2BF1				0.58	A2BF1				0.505	A2BF1		A3BF	0.8	0.61	0.61	1.1	1.1	1.2
			0.01	A3F1								0.01	A3F1				0.01	A3F1				0.01	A3F1				1.64	A3F1				1.64	A3F1				0.505	A3F1		FA3BF	0.21	0.23	0.57	0.91	0.66
																																								A4F						0.4
																																								FA4F	0.37	0.37	0.37	0.37	0.37
			0.01	FM5		0.2	6.34					0.17	FM5				0.29	FM5				0.2	FM5				0.65	FM5									0.65	FM5		A4BF	1.11	1.13	1.41	1.33	1.02	1.91
17	0.59	6.61	0.28	A2BG1		0.7	6.41			0.84	6.69	0.37	A2BG1		0.9	6.64	0.38	A2BG(3)1		1.44	6.61	0.38	A2BG(3)1		1.32	6.62	0.36	A2BG1GlcNAc1		1.23	6.2	0.36	A2BG1GlcNAc1		0.22	6.79				FA4BF	0.9	0.44	0.62	0.44	0.33
			0.3	A3G1								0.45	A3G1				0.5	*A3G(3)1				1.58	A3G(3)1																	total	12.1	12.83	13.03	12.81	11.92	10.245
			0.01	FA3B								0.01	FA3B				0.01	FA3B				0.02	FA3B				0.64	FA3B									0.22	FA3B
												0.01	A4				0.01	A4				0.29	A4				0.68	A4				1.23	A4
18	0.05	6.71				0.2	6.53			0.06	6.78									0.88	6.74				0.07	6.77				1.49	6.34									Galactosylation	UND	NAN1	ABS
															0.13	6.74																			0.06	6.87				G0	20.79	21.29	22.58	21.5533	no galactose
19	0.08	6.74								0.16	6.82				0.25	6.79																								G1	5.47	7.11	8.47	7.01667	1 galactose
20	0.05	6.78								0.13	6.85				0.07	6.85																			0.05	6.91				G2	17.64	18.54	18.24	18.14	2 galactoses
			0.01	FA2G1								0.05	FA2G1				0.02	FA2G(3)1				0.02	FA2G(3)1																	G3	15.83	13.51	10.6	13.3133	3 galactoses
			0.04	FA2BG1								0.08	FA2BG1				0.05	*FA2BG(4)1				0.02	FA2BG(3)1																	G4	2.64	2.66	2.61	2.63667	4 galactoses
																																								beta1-3				11.85
																						0.01	A4B				0.39	A4B				1.49	A4B		0.05	6.99				beta1-4				14.03
21	0.5	6.89	0.02	A1BF1G1		1.06	6.69			0.09	6.9	0.01	A1BF1G1		0.73	6.93	0.01	A1BF1G1		1.7	6.89	0.01	A1BF1G1		1.71	6.93	0.01	A1BF1G1		0.96	6.58				1.46	7.14	0.01	A1BF1G1		both				2.32
			0.02	A2F1G1						0.64	6.97	0.01	A2F1G1				0.01	A2F1G1				0.03	A2F1G1				0.01	A2F1G1									0.01	A2F1G1		total G				39.81
			0.2	A3BF1								0.01	A3BF1				0.01	A3BF1				0.5	A3BF1				0.5	A3BF1									0.5	A3BF1
			0.26	FA4								0.26	FA4				0.2	FA4				0.36	FA4				0.23	FA4									0.23	FA4		Sialylation	UND
																						0.8	M5A1				0.96	M5A1				0.96	M5A1				0.71	FA1F1G1		S0	33.57				no sialic acid
																																								S1	15.88				1 sialic acid
																																								S2	9.6				2 sialic acids
																																								S3	3.14				3 sialic acids
												0.35	M4A1G1				0.5	M4A1G(4)1																						S4	0.28				4 sialic acids
																																								alpha2-3	13.77				total 2-3 linked
22	4.01	7.03	1.63	M6D3		0.36	6.8			4.42	7.1	1.63	M6D3		3.78	7.06	1.63	M6D3		6.39	7.04	1.63	M6D3		4.01	7.06	1.63	M6D3		3.53	6.63	1.63	M6D3		5.19	7.21	2.05	M6D3		alpha2-6	15.13				total 2-6 linked
				M6D1									M6D1				0	M6D1					M6D1				0	M6D1					M6D1					M6D1		both	0
																						0.36	A2BG(3)2GlcNAc1																	total S	28.9				total sialylation
			1.9	junk		2.75	6.89	3.11				2.49	junk				2.15	junk				2	junk				3.38	junk				1.9	junk				1.54	junk
23	1.62	7.08	1.1	A2G2		0.03	6.97			2.38	7.18	1.4	A2G2		8.25	7.14	5.5	*A2G(3)2		3.01	7.1	5.23	A2G(3)2		3	7.11				1.4	6.68
												0.28	A3BG1				1.75	A3BG(4)1
																																					0.5	A2BF1G1
			1	FA4B								1	FA4B				1	FA4B				1	FA4B				1.1	FA4B				0.5	A2BF1G1				1.1	FA4B
										0.07	7.31																0.9	M5A2				0.9	M5A2
24	0.65	7.32				0.06	7.04			0.83	7.4				1.26	7.33				0.46	7.26				0.63	7.38				0.79	6.79				0.16	7.38
																				1.27	7.34
			0.2	FA1BF1G1								0.21	FA1BF1G1				0.21	FA1BF1G1				0.21	FA1BF1G1				0.21	FA1BF1G1									0.08	FA1BF1G1
			0.1	FA2F1G1								0.1	FA2F1G1				0.1	FA2F1G1				0.01	FA2F1G1				0.1	FA2F1G1									0.08	FA2F1G1
			0.34	A2BG2								0.37	A2BG2				0.27	*A2BG(3)2				0.72	A2BG(3)2
			0.01	A3F1G1								0.32	A3F1G1				0.32	A3F1G1				0.32	A3F1G1				0.32	A3F1G1				0.79	A3F1G1		0.17	7.49	0.17	A3F1G1
						0.93	7.09			0.17	7.44
25	0.09	7.4				0.1	7.18			0.17	7.48				0.3	7.44	0.3	*A4G(4)1				0.01	A4G(3)1		1.51	7.45				1.35	6.86				0.22	7.52
						0.03	7.23																												0.17	7.56
26	1.24	7.53				1.27	7.31			2.39	7.6	1.39	FA2G2		4.21	7.54	3.01	FA2G(4)2		1.43	7.51														0.16	7.61
			1	M6A1						0.08	7.7	1	M6A1				1	M6A1				1	M6A1				1.08	M6A1				1.35	M6A1
			0.2	FM5A2								0.2	FM5A2				0.2	FM5A2				0.43	FM5A2				0.43	FM5A2									0.55	FM5A2
27	2.76	7.69	0.22	FA1G1S(6)1		3.37	7.45			3.82	7.77	0.22	FA1G1S(6)1		4.82	7.71	1	FA2F1G1		2.65	7.68	1	FA2F1G1		1.24	7.65	1	FA2F1G1		1.54	7.32				0.1	7.73	0.1	FA2F1G1
			0.02	A2F1G2								0.21	A2F1G2				0.02	A2F1G2
			2.2	FA2BG2								2.19	FA2BG2				2.45	*FA2BG(4)2				1.23	FA2BG(3)2
			0.01	FA2BF1G1								0.01	FA2BF1G1				0.01	FA2BF1G1				0.12	FA2BF1G1				0.12	FA2BF1G1							0.13	7.77	0.295	FA2BF1G1
			0.01	FA3G2								0.96	FA3G2				1.01	*FA3G(4)2				0.01	FA3G(3)2
			0.01	FA3F1G1								0.01	FA3F1G1				0.01	FA3F1G1				0.12	FA3F1G1				0.12	FA3F1G1									0.295	FA3F1G1
			0.01	A4BG1								0.01	A4BG1				0.01	*A4BG(3)1				0.17	A4BG(3)1
																	0.36	A2BG(3)2Lac1
			0.21	M5A1G1								0.21	M5A1G1				0.31	M5A1G(4)1
																																			0.33	7.88
28	0.86	7.81				1.11	7.58			1.04	7.89				0.89	7.82				1.33	7.81	1.2	A4BG1GlcNAc1		1.1	7.84	0.88	A4BG1GlcNAc1		0.68	7.37	0.93	A4BG1GlcNAc1		0.96	7.99
			0.4	A3G2								0.4	A3G2				0.8	A3G(4)2
			0.46	junk								0.64	junk				0.09	junk				3.69	junk				0.7	junk				0.28	junk				0.96	junk
29	4.12	7.92	1.575	M7 D3		0.21	7.63			3.99	8	1.575	M7 D3		3.61	7.94	1.575	M7 D3		6.1	7.92	1.575	M7 D3		3.39	7.95	1.575	M7 D3		4.01	7.48	1.8	M7 D3		3.15	8.11	1.575	M7 D3
												0.01	FA2F2G1				0.25	FA2F2G1				0.2	FA2F2G1				0.25	FA2F2G1									0.01	FA2F2G1
			0.36	A2BG2Lac1S(6)1								0.36	A2BG2Lac1S(6)1
			0.01	A3F1G1S(6)1								0.01	A3F1G1S(6)1
						0.09	7.65
			0.6	*M4A1G1S(6)1								0.45	M4A1G1S(6)1																			0.4	A4F2
			1.565	M7 D1		0.16	7.69					1.565	M7 D1				1.565	M7 D1				1.565	M7 D1				1.565	M7 D1				1.8	M7 D1				1.565	M7 D1
30	0.47	8.03				0.1	7.72			0.47	8.09				0.17	8.01									0.88	8.09				0.93	7.55				0.18	8.2
			0.47	A4G1S(6)1								0.47	A4G1S(6)1
31	0.15	8.1				0.15	7.76			0.22	8.17				0.49	8.06				1.2	8.09														0.06	8.25
			0.15	FM5A2G1								0.22	FM5A2G1				0.49	FM5A2G(4)1
																																			0.22	8.3
32	0.08	8.15	0.02	FA2G2S(3)1		0.37	7.78			0.1	8.22				0.24	8.13				0.29	8.17
			0.02	FA2F1G2								1	FA2F1G2				1	FA2F1G2				1	FA2F1G2
			0.02	A3G2S(6)1								0.03	A3G2S(6)1
						0.22	7.85
33	2.7	8.32				0.03	7.93			6.62	8.38				1.04	8.26				1.33	8.32				0.6	8.25				0.5	7.73				0.43	8.43
			1.53	A2G2S(6)1		3.39	8.03					1.53	A2G2S(6)1
												0.01	FA4BG3		4.42	8.36	0.01	FA4BG(3)3				0.01	FA4BG(3)3		0.37	8.38				0.7	7.9				0.14	8.5
			0.17	FA2G2S(6)1								0.2	FA2G2S(6)1
												1	FA2F1G1S(6)1
			0.03	A3G3								2.13	A3G3				2.32	A3G(4,4,3)3
																	0.21	A3G(3)3				0.21	A3G(3)3
																	1.95	A3G(4)3
			0.6	A3BF3								0.6	A3BF3				0.6	A3BF3				0.6	A3BF3				0.6	A3BF3				1.2	A3BF3				0.14	A3BF3
			0.37	FA4F2								0.37	FA4F2				0.37	FA4F2				0.37	FA4F2				0.37	FA4F2							0.09	8.56	0.09	FA4F2
34	0.61	8.44				0.7	8.14			0.49	8.5				0.61	8.45									0.14	8.46				0.61	7.98				0.3	8.62
			0.41	A2F2G2								0.14	A2F2G2				0.14	A2F2G2				0.14	A2F2G2				0.14	A2F2G2				0.61	A2F2G2				0.3	A2F2G2
			0.2	FA2BG2S(6)1								0.2	FA2BG2S(6)1
35	0.55	8.53				0.63	8.25			0.57	8.59				0.65	8.55				1.21	8.52				0.65	8.55				0.79	8.05				0.75	8.72
										0.19	8.63
			0.3	junk								0.76	junk				0.65	junk				1.21	junk				0.65	junk				0.79	junk				0.75	junk
36	0.46	8.6	0.2	*A2G2S(6)1		0.54	8.28			0.48	8.65	1.03	A2G2S(6)1		0.79	8.58				0.31	8.61				0.66	8.7				0.74	8.11				0.23	8.85
			0.2	A2BF2G2								0.2	A2BF2G2				0.2	A2BF2G2				0.2	A2BF2G2				0.2	A2BF2G2				0.04	A2BF2G2
			0.15	A3BG3								0.15	A3BG3				0.15	A3BG(4)3
			0.18	FA3BF3								0.2	FA3BF3				0.54	FA3BF3				0.31	FA3BF3				0.66	FA3BF3									0.23	FA3BF3
37	8.05	8.78	0.21	FA2F2G2		2.63	8.41			3.44	8.78	0.22	FA2F2G2		2.31	8.74	0.52	FA2F2G2		9.81	8.76	0.52	FA2F2G2		5.63	8.8	0.52	FA2F2G2		5.14	8.27				4.95	8.99	0.52	FA2F2G2
			0.18	FA2BF2G2								0.1	FA2BF2G2				0.1	FA2BF2G(4)2
												0.4	A2BG2S(6)1
			0.31	A3F2G2								0.32	A3F2G2				0.31	A3F2G2				1	A3F2G2				0.01	A3F2G2				0.2	A3F2G2				0.01	A3F2G2
												1.5	FA3G3				1.48	*FA3G(3)3				1.6	FA3G(3)3
																						0.4	A3G3GlcNAc3				0.4	A3G3GlcNAc3				0.4	A3G3GlcNAc3
			1.98	*FA2G2S(6)1						6.3	8.84	0.8	FA2G2S(6)1		5.84	8.8
			0.01	A2F1G2S(6)1								0.01	A2F1G2S(6)1
																																					0.04	A2BF2G2
			0.01	FA2BG2S(6)1								0.05	FA2BG2S(6)1
			0.01	FA2BF1G1S(6)1								0.01	FA2BF1G1S(6)1
			0.2	A3F1G3								1	A3F1G3				0.2	A3F1G3				0.2	A3F1G3
																						0.89	A4G2GlcNAc2				0.9	A4G2GlcNAc2				0.9	A4G2GlcNAc2
			0.01	FA3G2S(6)1								0.01	FA3G2S(6)1
			0.01	FA3F1G1S(6)1								0.01	FA3F1G1S(6)1
			0.1	*M5A1G1S(3)1								0.01	M5A1G1S(6)1
			1	FA3BG3								1	FA3BG3				1.44	*FA3BG(3)3				1.4	FA3BG(3)3
			4	M8 D2,D3								4	M8 D2,D3				4	M8 D2,D3				4	M8 D2,D3				4	M8 D2,D3				4	M8 D2,D3				4	M8 D2,D3
38	1.8	8.98				0.28	8.56			0.42	8.97				1.65	9.05				0.51	8.94				0.36	8.99				1.07	8.38				0.26	9.18
												0.42	FA2F2G2				0.88	FA2F2G2				0.21	FA2F2G2				0.36	FA2F2G2									0.423333	FA2F2G2
			0.01	FA2F1G2S(3)1
			1.78	A3G3S(3)1
			0.01	FA4BG3S(3)1
						1.69	8.64			2.3	9.03
39	0.98	9.09	0.2	*A2F1G2S(3)2		1.01	8.72					0.01	A2F1G2S(6)2							0.61	9
			0.01	FA2BF2G2								0.01	FA2BF2G2				0.01	FA2BF2G2				0.15	FA2BF2G2		0.91	9.2	0.15	FA2BF2G2		1.17	8.6						0.423333	FA2BF2G2
			0.01	*A3G3S(6)1								1.52	A3G3S(6)1
			0.15	FA3F2G2								0.15	FA3F2G2				0.15	FA3F2G2				0.15	FA3F2G2				0.15	FA3F2G2									0.423333	FA3F2G2
			0.61	A4BF2G1								0.61	A4BF2G1				0.61	A4BF2G1				0.61	A4BF2G1				0.61	A4BF2G1				0.61	A4BF2G1				0.61	A4BF2G1
																																1	A2F3G2GlcNAc1				0.04	A2F3G2GlcNAc1
40	1.2	9.19	1.05	FA2F1G2S(3)1		1.41	8.82			0.61	9.18				0.74	9.17				0.56	9.09														0.44	9.21
			0.05	FA3F2G2S(3)1
												0.51	FA3F1G3				0.7	FA3F1G3				0.4	FA3F1G3
			0.1	A4G4								0.1	A4G4				0.04	*A4G(3)4				0.16	A4G(3)4
41	0.33	9.29	0.3	A2G2S(3)2		0.45	8.98			0.42	9.34				0.6	9.34				0.72	9.26				0.9	9.31				1.09	8.74				0.31	9.42
																																			0.23	9.48
			0.02	FA2BF2G2								0.38	FA2BF2G2				0.4	FA2BF2G2				0.72	FA2BF2G2				0.9	FA2BF2G2									0.21	FA2BF2G2
			0.01	A3BG3S(6)1								0.04	A3BG3S(6)1																			0.16	A2BF3G2
42	0.86	9.41				1.42	9.05			0.34	9.43									6.28	9.48				0.29	9.42				0.36	8.84				0.13	9.53
			0.84	FA2G2S(3)2
			0.01	FA2F2G2S(3)1
			0.01	A3F2G2S(3)1
												0.34	A4G3				0.2	*A4G(3)3				0.6	A4G(3)3
																																			0.06	9.61
43	4.41	9.51	0.97	FA2F1G2S(6)1		6.66	9.24			6.34	9.56	0.99	FA2F1G2S(6)1		4	9.53									4.25	9.53				4.39	8.93				3.69	9.72
			2	*A3G3S(6)1								1.1	A3G3S(6)1									1	FA2F3G2GlcNAc1				0.9	FA2F3G2GlcNAc1									0.9	FA2F3G2GlcNAc1
												0.01	A3F3G2				0.01	A3F3G2				0.01	A3F3G2
			0.01	FA3F2G3								0.01	FA3F2G3				0.01	FA3F2G3				0.01	FA3F2G3
			0.4	FM5A2G1S(6)1								0.4	FM5A2G1S(6)1
			0.03	FA3BF2G3								0.03	FA3BF2G3				0.03	FA3BF2G3				0.6	FA3BF2G3
			3.8	M9								3.8	M9				3.8	M9				3.9	M9				3.19	M9				4.39	M9				2.63	M9
44	6.11	9.61	0.01	FA2F1G2S(6)1						1.59	9.65	0.01	FA2F1G2S(6)1
			0.01	FA2BG2S(6)2								0.01	FA2BG2S(6)2
			0.16	FA2BF3G2								0.16	FA2BF3G2				0.16	FA2BF3G2				0.16	FA2BF3G2				0.16	FA2BF3G2									0.16	FA2BF3G2
			0.12	A3G2S(6)2								0.12	A3G2S(6)2
			1.01	*FA3G3S(3)1								0.01	FA3G3S(6)1
45	0.63	9.78				0.83	9.39			0.52	9.79				0.8	9.79				0.31	9.65				0.41	9.7				1.1	9.1				0.08	9.85
			2.13	*A2G2S(6)2								1.28	A2G2S(6)2																						0.11	9.89
			0.5	A4BF4								0.52	A4BF4				0.8	A4BF4				0.72	A4BF4				0.41	A4BF4				1.1	A4BF4				0.11	A4BF4
46	0.51	9.86				0.68	9.48			0.11	9.86				0.37	9.94				0.41	9.82				0.89	9.87				1.87	9.27				0.05	9.98
			0.31	A2G2S(6)2						0.72	9.93	0.72	A2G2S(6)2																						0.17	10.03
			0.2	*A2BG2S(6)2								0.11	A2BG2S(6)2																						0.13	10.08
47	1.55	10.03				1.24	9.64			0.62	10.02				0.11	9.99				0.63	10.05														0.04	10.15
															0.16	10.02																			0.09	10.23
										1.97	10.15				1.94	10.13									0.48	10.05				1.04	9.49
																																			0.09	10.27
												0.33	A4G4				0.33	*A4G(3)4				0.21	A4G(3)4
			0.05	A2F1G2S(3)2
			0.62	FA2G2S(3)2								0.96	FA2F3G2Lac1				0.94	FA2F3G2Lac1
			0.01	A3F1G3S(6)1								0.01	A3F1G3S(6)1
			0.2	A4G3S(3)1
			0.3	FA4G4								0.3	FA4G4				0.3	*FA4G(3)4				0.21	FA4G(3)4
			0.37	A4BG4								0.37	A4BG4				0.37	*A4BG(3)4				0.21	A4BG(3)4
																																			0.08	10.34
48	2.3	10.18				2.44	9.77			2.1	10.26				2.23	10.25				0.95	10.23				1.23	10.29									0.07	10.4
																																0.2	A4BF4				0.08	A4BF4
												0.7	A3F3G3				0.9	A3F3G3				0.95	A3F3G3				0.9	A3F3G3				0.84	A3F3G3				0.07	A3F3G3
			0.7	A3F2G3S(6)1								0.7	A3F2G3S(6)1				0.7	A3F2G3S(6)1
			0.9	FA3G3S(3)2
			0.7	FA3G3S(6)2								0.7	FA3G3S(6)2
						0.76	9.89																												0.42	10.47
49	0.32	10.38				0.52	9.98			0.16	10.4									0.06	10.39														0.1	10.66
										0.15	10.45									0.06	10.44
50	0.19	10.46								0.28	10.49	0.4	A4BG4Lac1		0.36	10.47	0.69	A4BG(4)4Lac1		0.21	10.54
			0.51	*A3G3S(3)2								0.19	A3G3S(6)2																								0.52	FA4BF4
51	1.27	10.68	1.27	*FA3G3S(6)2		1.64	10.27			0.14	10.64	0.94	FA3G3S(6)2							0.11	10.67	0.44	FA4BF4				0.33	FA4BF4
										0.2	10.67
										0.6	10.79
52	0.72	10.83				1.08	10.44			0.33	10.89
			0.42	A3G3S(3)2
			0.3	FA3BG3S(6)2								0.35	FA3BG3S(6)2
										0.02	10.99
53	0.31	10.98								0.15	11.08
			0.16	A3F3G3S(3)1
			0.15	A4BG4Lac1S(6)1		0.42	10.63					0.24	A4BG4Lac1S(6)1
										0.09	11.14
54	1.4	11.12				1.72	10.71			0.56	11.24				0.57	11.15
			0.7	FA2F3G2Lac1S(3)1
			0.01	FA2F2G2S(6)2								0.09	FA2F2G2S(6)2
			0.01	A3F1G3S(6)2								0.01	A3F1G3S(6)2
			0.68	*A3G3S(3)3								0.17	A3G3S(6)3
55	1.02	11.39				1.1	10.98			0.36	11.4				0.88	11.39
			1.02	A4G4Lac2								0.92	A4G4Lac2				0.88	A4G4Lac2
										0.56	11.43
56	2.21	11.53				2.6	11.1			0.44	11.59				0.92	11.57
			0.61	A3G3S(3)3
			0.7	A3F3G3S(3)2
			0.9	FA4BF4G1						0.39	11.67	0.44	FA4BF4G1				0.62	FA4BF4G1
57	0.57	11.85	0.29	A3G3Lac3		0.76	11.44					0.39	A3G3Lac3				0.3	A3G3Lac3
			0.28	A3G3S(3)4
58	1.85	12.09				2.34	11.67
			0.05	FA3G3S(3)3
			0.9	FA3F1G3S(3)3
			0.9	A3F1G3S(3)3
59	0.7	12.3				0.69	11.9
			0.7	A4G4Lac2S(3)1
60	0.45	12.53				0.95	12.03
61	0.45	12.74				0.46	12.31
62	0.59	12.94				0.38	12.52
						0.9	12.61
63	0.63	13.48				1.18	13.05
64	0.47	14.09				0.73	13.5
Sum	99.99		96.59			100.04				99.99		98.37			100.01		96.08			100.07		100.92			100.04		98.31			100.01		92.415			99.99		98.01
*=Major link
[truncated: 2 more columns]

## Sheet: EV CTRL
EV CTRL		UND				JBM				NAN1					ABS					ABS+SPG					ABS+BTG					ABS+BTG+GUH
Peak number	% Area	GU	%area	Glycan		% Area	GU	Glycan		% Area	GU	%area	Glycan		% Area	GU	%area	Glycan		% Area	GU	%area	Glycan		% Area	GU	%area	Glycan		% Area	GU	%area	Glycan
1	8.38	4.12				9.06	4.15			8.22	4.11				0.29	4.02				8.88	4.13				7.22	4.15				0.2	4.03					UND	NAN1	ABS	ABS+SPG	ABS+BTG	ABS+BTG+GUH
			8.15	junk								7.99	junk		8.18	4.13	8.24	junk				8.65	junk				6.99	junk		6.99	4.14	6.99	junk		high mannose	14.32	14.34	14.39	13.335	14.83	61.45	22.1108
			0.23	M3								0.23	M3				0.23	M3				0.23	M3				0.23	M3		40.55	4.25	40.55	M3		fucosylated high mannose	1.14	1.1	1.24	1.05	1.42	11.13	1.19	23.3008	total high mannose			BRANCHING
2	0.05	4.36				0.12	4.31			0.03	4.29				0.04	4.35				0.25	4.45				0.15	4.4				0.66	4.36				A1							0					A1= 1 antenna
						0.09	4.36																												FA1							0					A2 =2 antennas
3	0.17	4.44				0.12	4.42			0.21	4.43				0.27	4.46									0.2	4.48				0.18	4.46				A1B	0.28	0.34	0.47	0.28	0.21		0.316		total			A3 =3 antennas
						0.24	4.49																												FA1B	0.38	0.35	0.62	0.62	0.62	0.21	0.518	0.834	monoantennary			A4 =4 antennas
						0.08	4.57																												A2	8.99	7.81	9.1	8.35	8		8.45
4	0.14	4.61				0.2	4.67			0.16	4.59				0.18	4.6				0.1	4.61				0.37	4.64				17.36	4.7				FA2	4.4125	5.1325	4.34	4.07	5.11	0.21	4.613
5	0.39	4.69				0.15	4.77								0.57	4.69				0.39	4.69				0.55	4.74						7.36	M3B/A1		A2B	0.57	1.09	0.78	0.57	0.22	0.01	0.646
			0.39	FM3						0.48	4.67	0.48	FM3				0.57	FM3				0.39	FM3				0.55	FM3				10	FM3		FA2B	0.809167	0.809167	0.533333	0.533333	0.383333	0.02	0.613667	14.3227	biantennary
6	3.87	4.82	3.61	junk		4.47	4.87			3.9	4.81	3.9	junk		4.18	4.82	4.18	junk		4.31	4.82	4.31	junk		3.74	4.86	3.74	junk		3.61	4.84	3.61	junk		A3	28.6483	28.935	23.0233	29.0267	28.98	0.2	27.7227
7	0.05	5.01				0.07	5.02			0.1	4.98				0.09	5.02									0.08	5.06				0.76	5.06				FA3	3.8625	3.92583	3.64333	4.16	3	0.02	3.71833
						0.07	5.06																												A3B							0
						0.04	5.11			0.04	5.05				0.07	5.06																			FA3B	1.77	1.725	1.77	1.505	1.08	0.37	1.57	33.011	triantennary
						0.11	5.2			0.02	5.11				0.02	5.12																0.76	FM3B		A4	0.27	0.27	0.38	0.38	0.5		0.36
8	0.18	5.25				0.37	5.31			0.2	5.21				0.28	5.24				0.02	5.1				0.06	5.15				0.42	5.16	0.42	M4		FA4							0
																				2.01	5.32				0.04	5.22									A4B	0.56	0.56	0.56	0.56	0.6		0.568
			0.18	A1B		0.19	5.39			0.09	5.27	0.29	A1B				0.28	A1B				0.28	A1B		0.21	5.3	0.21	A1B		0	5.32				FA4B	0.696667	0.76	0.7	0.7	0.77	0.22	0.725333	1.65333	tetranantennary
																									11.43	5.37									Lac-total	1.19	0.93	1.23	1.24	1.38		1.194
9	0.05	5.37	0.05	A2		0.05	5.47			0.08	5.33	0.08	A2		0.03	5.37	0.03	A2				1.73	A2				8	A2		0.04	5.4				OAF-total	9.5975	9.5725	9.06	9.19	8.45	8.73	9.1
10	0.11	5.46				5.14	5.63			0.05	5.42				0.13	5.46				5.18	5.58				0.48	5.49				0.23	5.46				junk	19.48	20.98	22.71	17.83	17.26	14.75
11	4.91	5.59								4.84	5.57				4.89	5.58									4.45	5.61				4.56	5.6	3	A1F1		sum	96.9767	98.63	94.55	93.4	92.8133	97.32
			4.91	junk								4.84	junk				4.89	junk				1.56	junk				1.56	junk				1.56	junk			96.9767	98.63	94.55	93.4	92.8133	97.32
						0.07	5.74
12	0.6	5.8	0.06	FA1B		0.86	5.84			0.57	5.76	0.06	FA1B		0.78	5.77	0.06	FA1B		3.79	5.78	0.06	FA1B		29.45	5.84	0.62	FA1B		0.21	5.78	0.21	FA1B		Total core fucose	18.0025	17.9475	16.1967	14.4383	15.1333	16.04	16.2931
																											0.22	A2B		0.21	5.89	0.01	A2B		Total bisects	6.94833	7.43167	7.44333	7.16833	5.92333		6.983
																						5.75	A3				28.98	A3				0.2	A3
			0.54	FA2								0.51	FA2		0.06	5.86	0.78	FA2				0.51	FA2				5.11	FA2				0.21	FA2
13	0.05	5.91				0.11	5.92			0.03	5.89				0.04	5.92				0.05	5.93				0.77	5.95	0.383333	FA2B		0.04	5.99	0.02	FA2B		Lac:	UND	NAN1	ABS	ABS+SPG	ABS+BTG
																						1.14	FA3				3	FA3				0.02	FA3		A2Lac
						0.42	6.03			0.01	5.95				0.04	5.96				0.01	5.97														FA2Lac	0.18	0.18	0.18	0.18	0.18
14	0.07	6.05								0.03	6.01				0.01	6.01				0.01	6.04				7.63	6.22				2.29	6.14				A3Lac	0.33	0.45	0.37	0.37	0.37
						0.08	6.13																												A4Lac	0.5	0.2	0.34	0.4	0.54
																																			FA4Lac
15	1.56	6.14				0.09	6.19			1.46	6.12				1.62	6.13				5.09	6.18						1.23	A2F1				0.71	A2F1		A4BLac	0.18	0.1	0.34	0.29	0.29
																																			total	1.19	0.93	1.23	1.24	1.38
																											0.42	M4A1
			1.56	M5		0.89	6.3					1.46	M5				1.62	M5				1.56	M5				1.56	M5				1.58	M5		OAF:	UND	NAN1	ABS	ABS+SPG	ABS+BTG
16	0.1	6.23	0.1	A1BG1						0.05	6.24	0.05	A1BG1		0.19	6.24	0.19	A1BG(4)1		5.68	6.3									0.06	6.26				A1BF	0.02	0.02	0.02	0.02	0.02
																																			FA1BF
																																			A2F	0.955833	1.2025	1.07	1.46	2.66
17	1.99	6.37	0.11	A2G1		2.2	6.41			1.95	6.36	0.07	A2G1		2.12	6.36	0.07	A2G(3)1				0.07	A2G(3)1		1.88	6.4				1.95	6.38				FA2F	1.08667	1.21	0.77	0.63	0.48
			1.88	junk								1.88	junk				1.69	junk				1.69	junk				1.88	junk				1.39	junk		A2BF	0.89	0.89	0.89	0.89	0.89
18	0.32	6.52				0.52	6.56			0.29	6.49				0.2	6.49				0.56	6.48				2.52	6.53				1.22	6.52	0.56	A1F1G1		FA2BF	0.5325	0.5275	0.5	0.64	0.19
						0.18	6.59																				2	A3F1				0.85	A3F1		A3F	2.91	2.525	2.84	2.35	2.31
			0.32	FA1BG1								0.29	FA1BG1				0.56	FA1BG(3)1				0.56	FA1BG(3)1												FA3F	2.9425	2.9375	2.71	2.64	1.25
															0.08	6.51																0.37	FM5		A3BF
																														0.37	6.6				FA3BF	0.19	0.19	0.19	0.13	0.65
																																			A4F
																											1.08	FA3B				0.37	FA3B		FA4F
19	0.5	6.64				0.45	6.69			0.64	6.6				0.71	6.61				3.75	6.61	0.26	A4		1.06	6.64	0.5	A4		0.07	6.66				A4BF	0.07	0.07	0.07	0.43
			0.25	A2BG1								0.25	A2BG1				0.25	A2BG(3)1				0.25	A2BG(3)1												FA4BF
			0.25	A3G1		0.46	6.75					0.39	A3G1				0.54	*A3G(3)1				12.5	A3G(3)1							0.05	6.71				total	9.5975	9.5725	9.06	9.19	8.45
20	0.12	6.76				0.17	6.81			0.15	6.74				0.1	6.77				5.4	6.71				0.53	6.77				0.08	6.76
			0.12	FA2G1								0.15	FA2G1				0.06	FA2G(3)1				0.06	FA2G(3)1							0.04	6.81				Galactosylation	UND	NAN1	ABS
						0.15	6.87			0.03	6.81														0.07	6.86	0.6	A4B		0.14	6.92				G0	15.82	16.04	16.39	16.0833	no galactose
21	0.47	6.91				0.94	6.95			0.47	6.89				0.49	6.89				1.12	6.88				1.27	6.94				0.69	6.99				G1	2.745	2.715	3.52	2.99333	1 galactose
			0.02	A1BF1G1								0.02	A1BF1G1				0.02	A1BF1G1				0.02	A1BF1G1				0.02	A1BF1G1				0.02	A1BF1G1		G2	18.38	19.3	19.45	19.0433	2 galactoses
																																			G3	39.3017	37.835	30.88	36.0056	3 galactoses
																	0.02	M5A1				0.02	M5A1				0.02	M5A1				0.14	FA1F1G1		G4	1.24	0.86	1.24	1.11333	4 galactoses
																	0.42	M4A1G(3)1				0.42	M4A1G(3)1												beta1-3				29.62
			0.45	A2F1G1						0.05	6.95	0.5	A2F1G1				0.03	A2F1G1				0.66	A2F1G1				1.23	A2F1G1				0.67	A2F1G1		beta1-4				7.16
22	3	7.04	1.76	M6D3		0.29	7.07			2.92	7.03	1.68	M6D3		2.47	7.05	1.23	M6D3		4.11	7.03	2.87	M6D3		3.38	7.07	1.24	M6D3		3.66	7.06	1.9	M6D3		both				9.5
			1.24	M6D1								1.24	M6D1				1.24	M6D1				1.24	M6D1				2.14	M6D1				1.76	M6D1		total G				54.45
																																			Sialylation	UND
23	1.43	7.08				2.08	7.17			2.87	7.11				13.23	7.13	1	FA3G(4)1		6.65	7.11				2.19	7.13				0.72	7.12				S0	24.705				no sialic acid
			1	A2G2								1	A2G2				9	*A2G(3)2				6.55	A2G(3)2												S1	10.9083				1 sialic acid
			0.43	junk		0.09	7.24					1.87	junk				3.23	junk				0.72	junk				2.19	junk				0.72	junk		S2	14.5933				2 sialic acids
24	0.04	7.26				0.18	7.3			0.05	7.22				0.21	7.27				1.28	7.35				0.42	7.26	0.01	A3F1G1		0.19	7.19	0.01	A3F1G1		S3	26.4				3 sialic acids
																											0.41	FA2F1G1		0.01	7.26	0.19	FA2F1G1		S4					4 sialic acids
25	0.41	7.33	0.07	A2BG2		0.67	7.37			0.62	7.31	0.28	A2BG2		0.66	7.32	0.53	A2BG(3)2				0.32	A2BG(3)2		0.77	7.36				0.07	7.31				alpha2-3	16.85				total 2-3 linked
			0.34	FA4B								0.34	FA4B				0.34	FA4B				0.34	FA4B				0.77	FA4B				0.22	FA4B		alpha2-6	15.5417				total 2-6 linked
																																			both	19.51
																																			total S	51.9017				total sialylation
																														0.15	7.36
26	0.04	7.4				0.13	7.43			0.08	7.41				0.15	7.4
27	0.03	7.44				0.09	7.5			1.91	7.52				3.4	7.53				5.7	7.47				1.72	7.46				0.13	7.42
28	0.82	7.54	0.16	FA2G2		0.75	7.59					1.25	FA2G2				3.5	FA2G(3)2				3.5	FA2G(3)2
			0.66	M6A1								0.66	M6A1				0.66	M6A1				0.66	M6A1				0.66	M6A1		0.04	7.52
																				4.12	7.57
						0.14	7.64								0.03	7.61	1	FA3F1				2.42	FA3F1		0.08	7.56	1.06	FA3F1		0.07	7.57
29	2.11	7.7				2.24	7.74			2.74	7.68														0.2	7.61				0.04	7.62
			0.01	A2F1G2								0.11	A2F1G2				0.5	A2F1G2				0.5	A2F1G2				0.29	A4BG1GlcNAc1
			0.526667	FA2BG2								0.526667	FA2BG2		3.73	7.7	0.383333	FA2BG(3)2		1.9	7.68	0.383333	FA2BG(3)2		0.52	7.65				0.15	7.7
			1.04333	A3G2								1.2	A3G2				0.983333	*A3G(3)2				1.60667	A3G(3)2
			0.01	FA3G2								0.383333	FA3G2				0.383333	*FA3G(3)2				1.9	FA3G(3)2
			0.52	FM5A2								0.52	FM5A2				0.52	FM5A2				0.52	FM5A2				0.87	FM5A2
																	0.23	M5A1G(3)1				0.23	M5A1G(3)1
																									0.35	7.75				0.05	7.75
30	0.51	7.83	0.01	FA2BG2		0.78	7.86			3.55	7.92	0.01	FA2BG2		0.49	7.84	0.15	FA2BG(3)2		3.75	7.92	0.15	FA2BG(3)2		0.9	7.83				0.48	7.83
			0.5	junk								0.5	junk				0.48	junk				0.9	junk				0.9	junk				0.48	junk
31	3.15	7.93	1.535	M7 D3		0.39	7.94					1.425	M7 D3		2.9	7.95	1.705	M7 D3				1.505	M7 D3		2.76	7.95	1.565	M7 D3		2.39	7.94	1.195	M7 D3
						0.21	7.96
			0.42	M4A1G1S(6)1								0.42	M4A1G1S(6)1
			1.195	M7 D1		0.17	8.03					1.195	M7 D1				1.195	M7 D1				1.195	M7 D1				1.195	M7 D1				1.195	M7 D1
32	0.31	8.03				0.08	8.07			0.13	8.03				0.15	8.05				0.14	8.01				0.39	8.09				0.08	8.05
			0.23	FM5A2G1		0.1	8.1			0.1	8.08	0.1	FM5A2G1				0.15	FM5A2G(3)1				0.14	FM5A2G(3)1
						0.04	8.14			0.08	8.11
						0.1	8.17								0.27	8.12				0.48	8.09									0.05	8.1
			0.08	FA2F1G2								0.08	FA2F1G2				0.41	FA2F1G2				0.61	FA2F1G2		0.28	8.15				0.04	8.13
						0.07	8.21										0.01	FA3G(3)3				0.01	FA3G(3)3							0.1	8.17
33	2.72	8.32				0.07	8.26			11.29	8.3				2.75	8.23	0.36	FA4BG(3)3		2.37	8.2	0.36	FA4BG(3)3		0.31	8.25				0.13	8.25
			2.68	A2G2S(6)1		3.14	8.36					4.5	A2G2S(6)1		21.5	8.34				9.17	8.31				0.26	8.33				0.03	8.29
			0.01	FA2G2S(6)1								0.01	FA2G2S(6)1																	0.03	8.33
																									0.15	8.36	0.54	A4G2GlcNAc2		0.05	8.38
			0.03	A3G3								6.78	A3G3				9.5	A3G(4,4,3)3
																	9	A3G(3)3				9.17	A3G(3)3
																	3	A3G(4)3							0.13	8.4				0.07	8.46
34	0.28	8.44	0.14	A2F2G2		0.28	8.46			0.28	8.41	0.14	A2F2G2		0.54	8.45	0.54	A2F2G2		0.3	8.42	0.3	A2F2G2		0.2	8.49	0.2	A2F2G2		0.17	8.53	0.32	A2F2G2
			0.14	FA2BG2S(6)1		0.15	8.49					0.14	FA2BG2S(6)1																			0.36	FA2BF2G2
35	0.4	8.55	0.2	A2G2S(6)1		0.5	8.55			0.76	8.56	0.56	A2G2S(6)1		0.46	8.55				0.6	8.52				0.65	8.56				0.29	8.56
			0.2	FA3BF2G2								0.2	FA3BF2G2				0.46	FA3BF2G2				0.6	FA3BF2G2				0.65	FA3BF2G2				0.29	FA3BF2G2
															0.22	8.6
36	6.32	8.78				0.29	8.64			2.57	8.69				2.27	8.73	2.25	*FA3G(4)3		0.18	8.6	1.11	FA3G(3)3		0.3	8.66				0.15	8.67
			0.02	A3F2G2								0.02	A3F2G2				0.02	A3F2G2		0.93	8.69	0.02	A3F2G2				0.3	A3F2G2				0.15	A3F2G2
			0.1225	*FA2G2S(6)1		1.92	8.76			4.64	8.76	2.4125	FA2G2S(6)1		4.32	8.8				4.29	8.76				0.31	8.69				0.07	8.71
			0.1225	A2F1G2S(6)1		0.06	8.86			1.4	8.87	0.1225	A2F1G2S(6)1		2.93	8.92				0.28	8.89				4.34	8.81				3.69	8.79
			0.1225	FA2BG2S(6)1								0.1225	FA2BG2S(6)1
			0.89	A2BF2G2								0.89	A2BF2G2				0.89	A2BF2G2				0.89	A2BF2G2				0.89	A2BF2G2				0.89	A2BF2G2
			0.1225	FA2BF1G1S(6)1								0.1225	FA2BF1G1S(6)1
			0.1225	FA3G2S(6)1								0.1225	FA3G2S(6)1
			0.1225	FA3F1G1S(6)1								0.1225	FA3F1G1S(6)1
																	1.65	A3F1G3				1.65	A3F1G3
			0.23	M5A1G1S(6)1								0.23	M5A1G1S(6)1
			1.505	FA3BG3								1.505	FA3BG3				1.77	*FA3BG(3)3				1.505	FA3BG(3)3
			2.94	M8 D2,D3								2.94	M8 D2,D3				2.94	M8 D2,D3				0.505	M8 D2,D3				2.94	M8 D2,D3		0.07	8.9	2.94	M8 D2,D3
37	1.07	8.98	0.356667	FA2F1G2S(6)1		0.15	8.93			1.26	8.93	0.42	FA2F1G2S(6)1		1.18	9.02	0.37	A3G3GlcNAc3		0.57	8.99	0.37	A3G3GlcNAc3		0.36	8.97	0.37	A3G3GlcNAc3		0.26	8.98
			0.36	FA2F2G2								0.42	FA2F2G2				0.36	FA2F2G2				0.02	FA2F2G2				0.07	FA2F2G2				0.26	FA2F2G2
			0.356667	FA4BG3S(6)1		1.16	9.01					0.42	FA4BG3S(6)1
																						0.29	A4BG(3)3GlcNAc1
38	0.64	9.1				0.32	9.06			0.31	9														0.26	9.03				0.13	9.04
			0.213333	*A2F1G2S(6)2								0.31	A2FG2S(6)2				0.58	FA3F1G3				0.02	FA3F1G3		0.05	9.1
																									0.07	9.13
			0.21	FA2BF2G2						0.41	9.06	0.205	FA2BF2G2				0.04	FA2BF2G2				0.04	FA2BF2G2				0.19	FA2BF2G2				0.065	FA2BF2G2
			0.21	FA3F2G2		0.91	9.13					0.205	FA3F2G2				0.2	FA3F2G2				0.2	FA3F2G2				0.19	FA3F2G2				0.065	FA3F2G2
39	3.35	9.19	0.28	FA2F1G2S(6)1		3.31	9.21			0.28	9.13	0.28	FA2F1G2S(6)1		0.28	9.15				0.12	9.04				0.07	9.16				0.04	9.11
																	0.28	A3F2G3				0.12	A3F2G3
			0.19	FA3F2G2S(6)1						0.19	9.19	0.19	FA3F2G2S(6)1
															0.1	9.18									1.04	9.25				0.12	9.16
40	0.3	9.27				0.16	9.31			0.24	9.25				0.38	9.24	0.38	*A4G(4)3		0.07	9.11	0.12	A4G(3)3							0.12	9.23
																				0.05	9.15
			0.24	A2G2S(6)2		0.34	9.34					0.24	A2G2S(6)2		0.16	9.31	0.34	*A4G(3)3GlcNAc2		0.53	9.27	0.4	A4G(3)3GlcNAc2							0.25	9.28
41	0.42	9.42	3.36	*FA2G2S(3)2		0.68	9.43			0.7	9.34	0.7	FA2G2S(6)2		0.55	9.4									0.37	9.39				0.12	9.36
																				0.12	9.29									0.07	9.42
42	2.98	9.52	0.01	FA2F1G2S(6)1		0.16	9.51			17.18	9.45	0.01	FA2F1G2S(6)1		4.29	9.53				0.13	9.35				3.04	9.53				2.73	9.51
			2.57	*A3G3S(6)1								14.55	A3G3S(6)1
			1.65	A3F1G3S(6)1								1.65	A3F1G3S(6)1
												0.9	FA3G3S(6)1
			0.19	FA3BF2G3								0.19	FA3BF2G3				0.19	FA3BF2G3				0.13	FA3BF2G3
						0.35	9.58													3.08	9.48
43	7.94	9.63	2.55	M9		7.27	9.64			2.99	9.55	2.86	M9				2.9	M9				2.9	M9				2.86	M9				2.55	M9
																						0.18	FA2F3G2GlcNAc1				0.18	FA2F3G2GlcNAc1				0.18	FA2F3G2GlcNAc1
			0.01	FA2BG2S(6)2								0.01	FA2BG2S(6)2
44	0.47	9.76	4.34	*A2G2S(3,6)2		0.25	9.74			0.71	9.69	0.64	A2G2S(6)2		0.07	9.69				0.43	9.68
			0.07	A4BF4		0.41	9.81					0.07	A4BF4		0.65	9.76	0.07	A4BF4				0.43	A4BF4
45	0.62	9.9				0.22	9.85			0.72	9.82				0.08	9.84
			0.37	*A2G2S(6)2		0.66	9.92					0.72	A2G2S(6)2		0.34	9.89	0.34	A4BG(4)4Lac1		0.22	9.83
			0.25	A2BG2S(6)2						0.56	9.9	0.56	A2BG2S(6)2		0.38	9.97				0.56	10.04
															0.29	10.01
						0.13	10			0.59	9.97
46	1.37	10.06				1.13	10.07			5.24	10.08				1.2	10.11
			0.1	FA2G2S(6)2								0.1	FA2G2S(6)2
			0.02	A2F1G2S(6)2								0.02	A2F1G2S(6)2
												2.42	FA3F1G3				0.93	FA3F1G3
			0.27	A4G3S(6)1								0.27	A4G3S(6)1
			0.56	A4BG4								0.56	A4BG4				0.56	A4BG(3)4				0.56	A4BG(3)4
47	1.18	10.2	0.9	FA3G3S(3,6)2		0.31	10.15					2.18	FA3G3S(6)2		1.07	10.24	0.89	A3F3G3		0.56	10.22	0.56	A3F3G3
			0.28	A3F2G3S(6)1		0.96	10.21					0.28	A3G3F2S(6)1
						0.28	10.26										0.18	FA2F3G2Lac1
48	1.41	10.33				2.5	10.35			0.27	10.32				0.17	10.38				0.27	10.26
			1.41	*A3G3S(3)2								0.27	A3G3S(6)2
49	0.31	10.47				0.24	10.42			0.08	10.38				0.18	10.45				0.09	10.4
						0.16	10.47			0.12	10.43				0.03	10.53
						0.09	10.51								0.05	10.58				0.22	10.67
50	0.16	10.57				0.21	10.54			0.06	10.49				0.04	10.62
										0.1	10.55				0.13	10.66
51	1.98	10.75	0.3	FA3G3S(6)2		0.32	10.65			0.3	10.6	0.3	FA3G3S(6)2							0.12	10.79
						2.32	10.78			4.37	10.71
52	0.53	10.88	0.265	*FA3BG3S(6)2		0.28	10.89			0.44	10.82	0.22	FA3BG3S(6)2
			1.945	*A3G3S(6)2		0.24	10.93					4.59	A3G3S(6)2
						0.11	10.95
						0.11	11.01
53	0.22	11.06	0.04	A3F3G3S(6)1		0.35	11.07			0.14	10.98	0.04	A3F3G3S(6)1
			0.18	*A4BG4Lac1S(6)1								0.1	A4BG4Lac1S(6)1
54	9.86	11.19	0.01	A3F1G3S(6)2		9.28	11.21			0.25	11.1	0.01	A3F1G3S(6)2
			0.01	A3F2G2S(6)2						0.64	11.19	0.01	A3F2G2S(6)2
			0.18	FA2F3G2Lac1S(6)1								0.18	FA2F3G2Lac1S(6)1
			9.66	*A3G3S(3)3								0.69	A3G3S(6)3
55	0.37	11.32				0.14	11.34			0.07	11.28
						0.22	11.37
			0.37	A4G4Lac2		0.29	11.42					0.07	A4G4Lac2
56	0.46	11.48				0.33	11.48			0.93	11.37
						0.31	11.51
57	10.11	11.6	11.74	*A3G3S(3,3,6)3		9.6	11.62					0.465	A3G3S(6)3
			0.85	*A3F3G3S(6)2								0.465	A3F3G3S(6)2
58	0.33	11.74	0.33	A3G3Lac3		0.18	11.8			0.45	11.5	0.45	A3G3Lac3
						0.21	11.86
59	5.19	12.02	2.53	*FA3G3S(3,6,6)3		0.35	11.95			0.08	11.71	0.04	FA3G3S(6)3
			0.05	A3F1G3S(6)3		4.17	12.05					0.05	A3F1G3S(6)3
			0.13	A4G4Lac2S(6)1		0.51	12.2			0.05	11.77	0.13	A4G4Lac2S(6)1
						0.14	12.26			0.07	11.84
						0.11	12.29			0.02	11.9
60	2.42	12.41				0.07	12.34
			2.42	FA3F1G3S(3)3		2.01	12.42
						0.17	12.55
						0.25	12.6
						0.22	12.67
						0.13	12.72
						0.2	12.76
61	0.49	12.84				0.55	12.86
						0.2	12.95
62	0.2	13				0.46	13.06
						0.65	13.19
Sum	100.03		96.9767			100.01				99.96		98.63			99.96		94.55			99.99		93.4			100.03		92.8133			99.99		97.32
*=Major link

## Sheet: EV Treated
EV Treated		UND				JBM				NAN1					ABS					ABS+SPG					ABS+BTG					ABS+BTG+GUH
Peak number	% Area	GU	%area	Glycan		% Area	GU	Glycan		% Area	GU	%area	Glycan		% Area	GU	%area	Glycan		% Area	GU	%area	Glycan		% Area	GU	%area	Glycan		% Area	GU	%area	Glycan
1	18.46	4.13				20.57	4.12			19.58	4.12				0.13	4.05				19.97	4.13				18.03	4.13				0.09	4.08
			18.19	junk								19.31	junk		18.54	4.17	18.27	junk				19.7	junk				17.76	junk		17.76	4.17	17.76	junk			UND	NAN1	ABS	ABS+SPG	ABS+BTG	ABS+BTG+GUH
			0.27	M3								0.27	M3				0.27	M3				0.27	M3				0.27	M3		14.71	4.29	14.71	M3		high mannose	16.29	13.03	15.044	13.28	13.33	34.77	17.624
2	0.04	4.3				0.17	4.32			0.11	4.29				0.03	4.4									0.09	4.36				1.92	4.4				fucosylated high mannose	0.76	0.72	0.83	1.2	1.15	10.12	0.932	18.556	total high mannose			BRANCHING
						0.04	4.37																												A1							0					A1= 1 antenna
3	0.03	4.46				0.03	4.44			0.08	4.43				0.13	4.52				0.14	4.44				0.09	4.49				0.07	4.62				FA1	0.19	0.19	0.19	0.19	0.26	0.26	0.204					A2 =2 antennas
						0.07	4.49																												A1B							0		total			A3 =3 antennas
						0.02	4.54																												FA1B	0.465	0.475	0.465	0.715	0.465	0.19	0.517	0.721	monoantennary			A4 =4 antennas
4	0.1	4.63				0.1	4.61			0.06	4.59				0.06	4.67				0.11	4.6				0.12	4.6				13.71	4.75	7.71	M3B/A1/		A2	5.22	6.565	5.29	6.22	5.29		5.717
5	0.46	4.72	0.46	FM3		0.1	4.71			0.42	4.68	0.42	FM3		0.39	4.75	0.39	FM3		0.43	4.69	0.43	FM3		0.38	4.72	0.38	FM3				6	FM3		FA2	2.025	2.345	1.615	2.375	2	0.27	2.072
6	9.12	4.84	9.12	junk		9.97	4.83			9.27	4.81	9.27	junk		9.16	4.89	9.16	junk		9.43	4.83	9.43	junk		9.1	4.84	9.1	junk		9.95	4.88	9.95	junk		A2B	0.685	0.76	0.685	0.536667	0.69	0.01	0.671333
7	0.11	5.09				0.03	5.01			0.06	5.04				0.03	5.05				0.11	5				0.04	5.01				0.28	5.13				FA2B	0.72	0.99	0.85	1.83	0.89	0.01	1.056	9.51633	biantennary
						0.04	5.05																												A3	10.835	9.985	10.375	9.79667	10.92	0.01	10.3823
						0.02	5.11			0.04	5.09				0.05	5.11																			FA3	4.46	4.71	3.41	3.4	3.92	0.015	3.98
						0.13	5.16			0.01	5.12				0.02	5.17				0.02	5.12														A3B							0
8	0.19	5.28				0.09	5.27			0.13	5.26				0.15	5.31				0.17	5.25				0.17	5.13				3.66	5.22	0.31	M4		FA3B	0.44	0.44	0.44	0.4	0.44	0.3	0.432	14.7943	triantennary
																									0.02	5.17						3.35	FM3B		A4							0
										0.08	5.27														0.26	5.3	0.26	FA1		0.03	5.38	0.26	FA1		FA4							0
9	0.05	5.36				0.09	5.35			0.05	5.36				0.06	5.44				0.1	5.32				5.29	5.36				0.03	5.41				A4B	0.65	0.65	0.65	0.79	0.38		0.624
																											5.29	A2							FA4B	0.28	0.28	0.22	0.28	0.28	0.48	0.268	0.892	tetranantennary
10	0.06	5.51				0.07	5.44			0.05	5.45				0.04	5.53				11.12	5.59				0.84	5.48				0.11	5.52				Lac-total	1.45	1.07	1.56	1.82	1.22		1.424
11	10.92	5.61				11.77	5.59			10.7	5.57				11.06	5.67									10.61	5.6				10.05	5.66	5	A1F1		OAF-total	7.55667	8.44	8.466	8.60333	7.12	8.63167	8.13628
			10.92	junk								10.7	junk				11.06	junk				9.62	junk				10.61	junk				5.05	junk		junk	44.77	45.78	45.99	45.29	45.42	39.75
12	0.37	5.83	0.185	FA1B		0.14	5.73			0.39	5.76	0.195	FA1B		0.45	5.86	0.225	FA1B		0.65	5.78	0.325	FA1B		16.55	5.83	0.465	FA1B		0.21	5.85	0.19	FA1B		sum	96.7967	96.43	96.08	96.7267	93.775	94.8167
																											0.69	A2B				0.01	A2B			96.7967	96.43	96.08	96.7267	93.775	94.8167
						0.55	5.8															1.5	A3				10.92	A3				0.01	A3
			0.185	FA2								0.195	FA2				0.225	FA2				0.325	FA2				2	FA2		0.27	5.96	0.27	FA2
13	0.04	5.91				0.19	5.91			0.06	5.89				0.07	5.98	0.07	FA2B		0.08	5.91	0.08	FA2B		1.78	5.95	0.89	FA2B		0.02	6.06	0.01	FA2B		Total core fucose	14.0167	15.51	13.46	15.63	13.22	13.8483	14.2808
															0.05	6.03				0.04	5.98						3.92	FA3				0.01	FA3		Total bisects	4.475	5.065	5.995	7.45667	5.3		5.65833
										0.01	5.96				0.01	6.07				0.02	6.02
14	0.05	6.03				0.23	5.97			0.03	6.06				0.03	6.15				1.67	6.14	0.59	A2F1		6.76	6.21	2.34	A2F1		1.58	6.21	0.01	A2F1
						0.07	6.05
																											0.31	M4A1
15	1.08	6.16				0.24	6.16			1.01	6.12				1.08	6.23																			Lac:	UND	NAN1	ABS	ABS+SPG	ABS+BTG
																																			A2Lac
			1.08	M5								1.01	M5				1.08	M5				1.08	M5				1.08	M5				1.57	M5		FA2Lac	0.17	0.17	0.17	0.17	0.17
16	0.26	6.27				0.5	6.26			0.11	6.25				0.19	6.34				5.32	6.37									0.3	6.35				A3Lac
																	0.19	FA1G(3)1				0.19	FA1G(3)1												A4Lac	0.75	0.37	0.64	0.66	0.36
																																0.3	A1F1G1		FA4Lac
17	3.83	6.38	0.03	A2G1		4.46	6.37			3.83	6.36	0.03	A2G1		4.2	6.46	0.4	*A2G(3)1				1.33	A2G(3)1		3.8	6.38				3.8	6.45				A4BLac	0.53	0.53	0.75	0.99	0.69
			3.8	junk								3.8	junk				3.8	junk				3.8	junk				3.8	junk				3.8	junk		total	1.45	1.07	1.56	1.82	1.22
18	0.28	6.52				0.58	6.5			0.28	6.5				0.15	6.59				0.39	6.49				2.08	6.51				0.77	6.58
																																			OAF:	UND	NAN1	ABS	ABS+SPG	ABS+BTG
															0.09	6.61											0.14	A2F1G1				0.005	A2F1G1		A1BF	0.1	0.1	0.1	0.1	0.1
			0.28	FA1BG1								0.28	FA1BG1				0.24	*FA1BG(3)1				0.39	FA1BG(3)1				1.94	FA3				0.005	FA3		FA1BF
																																			A2F	2.37	2.47	2.12	2.72	2.74
19	0.32	6.65				0.21	6.6			0.31	6.6				0.46	6.71				0.8	6.61											0.76	FM5		FA2F	1.62667	1.84	0.93	0.93	0.315
			0.225	A2BG1		0.19	6.65					0.225	A2BG1				0.225	*A2BG(3)1				0.266667	A2BG(3)1		0.62	6.63				0.22	6.67				A2BF	0.06	0.06	0.06	0.06	0.06
			0.095	A3G1								0.095	A3G1				0.225	*A3G(3)1				0.266667	A3G(3)1												FA2BF	0.505	0.74	1.735	1.715	1.265
																																			A3F	0.7	0.65	0.916	0.653333	0.295
						0.41	6.69															0.266667	FA3B				0.44	FA3B		0.08	6.72	0.3	FA3B		FA3F	2.155	2.44	2.565	2.385	2.305
20	0.11	6.74				0.15	6.76			0.02	6.77				0.09	6.85	0.01	*FA2BG(3)1		0.63	6.74	0.55	FA2BG(3)1		0.2	6.76				0.03	6.79				A3BF
			0.11	FA2G1								0.02	FA2G1				0.08	FA2G(3)1				0.08	FA2G(3)1							0.11	6.83				FA3BF	0.04	0.04	0.04	0.04	0.04
																											0.38	A4B							A4F
						0.11	6.8			0.02	6.81														0.03	6.83				0.05	6.93				FA4F
21	0.43	6.92				0.93	6.92			0.36	6.89				0.42	7				0.8	6.89				0.81	6.93				0.84	6.98				A4BF
																																			FA4BF
			0.1	A1BF1G1								0.1	A1BF1G1				0.1	A1BF1G1				0.1	A1BF1G1				0.1	A1BF1G1				0.1	A1BF1G1		total	7.55667	8.34	8.466	8.60333	7.12
																	0.01	M5A1				0.18	M5A1				0.5	M5A1				0.74	FA1F1G1		Galactosylation	UND	NAN1	ABS
																	0.31	M4A1G(3)1				0.31	M4A1G(3)1							0.51	7.05				G0	16.43	13.19	17.084	15.568	no galactose
			0.33	A2F1G1						0.01	6.96	0.27	A2F1G1				0.21	A2F1G1				0.21	A2F1G1				0.21	A2F1G1				0.51	A2F1G1		G1	2.73	2.99	2.8	2.84	1 galactose
22	2.51	7.07	2.51	M6D3		0.18	7.02			2.51	7.04	2.51	M6D3		2.68	7.15	2.68	M6D3		3.02	7.04	3.02	M6D3		2.76	7.07	2.76	M6D3		2.95	7.14	2.95	M6D3		G2	12.4567	15.74	12.205	13.4672	2 galactoses
				M6D1									M6D1					M6D1					M6D1					M6D1					M6D1		G3	18.48	17.08	15.971	17.177	3 galactoses
																																			G4	1.92	1.54	2.03	1.83	4 galactoses
23	2.91	7.12	1.91	junk		3	7.11			3.07	7.1	1.87	junk		7.27	7.23	2.38	junk		6.8	7.12	1.91	junk		3.6	7.12	3.32	junk		2.08	7.2	1.91	junk		beta1-3				22.54
																																0.17	FA1BF1G1		beta1-4				3.33
			1	A2G2		0.11	7.19					1.2	A2G2				4.89	A2G(3)2				4.89	A2G(3)2				0.28	FA4B		0.48	7.27	0.48	FA4B		both				0
24	0.04	7.29				0.11	7.25			0.07	7.25				0.89	7.36				0.76	7.25				0.18	7.27				0.02	7.34				total G				32.796
																														0.07	7.41
25	0.26	7.35				0.9	7.33			0.39	7.31				0.47	7.42				0.28	7.31				0.39	7.38	0.285	FA2F1G1		0.06	7.45	0.06	FA2F1G1		Sialylation	UND
			0.25	A2BG2								0.38	A2BG2				0.46	*A2BG(3)2				0.27	A2BG(3)2												S0	23.8217				no sialic acid
			0.01	A3F1G1								0.01	A3F1G1				0.01	A3F1G1				0.01	A3F1G1				0.285	A3F1G1		0.25	7.53	0.25	A3F1G1		S1	7.125				1 sialic acid
																																			S2	7.36				2 sialic acids
																																			S3	13.1				3 sialic acids
																																			S4	0.62				4 sialic acids
26	0.03	7.39				0.19	7.44			0.08	7.37				0.22	7.49				0.28	7.38														alpha2-3	2.58				total 2-3 linked
																	0.22	*FA4BG(3)3				0.28	FA4BG(3)3												alpha2-6	11.385				total 2-6 linked
27	0.03	7.45				0.15	7.48			1	7.52				1.94	7.64				2.93	7.5				0.97	7.48				0.06	7.56				both	14.24
28	0.5	7.55	0.04	FA2G2		0.46	7.53					0.51	FA2G2				1.31	*FA2G(3)2				1.97	FA2G(3)2												total S	28.205				total sialylation
			0.19	M6A1								0.19	M6A1				0.19	M6A1				0.19	M6A1				0.2	M6A1		0.01	7.66
			0.3	FM5A2								0.3	FM5A2				0.44	FM5A2				0.77	FM5A2				0.77	FM5A2				0.01	FM5A2
						0.29	7.6								0.27	7.72				1.55	7.58				0.13	7.59				0.05	7.69
29	1.66	7.72	0.19	FA1G1S(6)1		1.91	7.7			2.16	7.68	0.19	FA1G1S(6)1				1.5	FA3F1				1.94	FA3F1		0.12	7.64				0.03	7.73
			1.09	A2F1G2								1.09	A2F1G2		2.95	7.81	0.63	A2F1G2		2.42	7.68	0.94	A2F1G2		0.15	7.68				0.08	7.77
			0.01	FA2BG2								0.01	FA2BG2				0.27	FA2BG(3)2				0.27	FA2BG(3)2
			0.21	FA2BF1G1								0.21	FA2BF1G1				0.21	FA2BF1G1				0.21	FA2BF1G1				0.21	FA2BF1G1				0.04	FA2BF1G1
			0.06	A3G2								0.56	A3G2				0.01	A3G(3)2				0.01	A3G(3)2
			0.01	FA3G2								0.01	FA3G2				0.01	FA3G(3)2				0.01	FA3G(3)2
			0.08	FA3F1G1								0.08	FA3F1G1				0.08	FA3F1G1				0.08	FA3F1G1				0.33	FA3F1G1				0.04	FA3F1G1
			0.01	A4BG1								0.01	A4BG1				0.01	A4BG(3)1				0.01	A4BG(3)1
																	0.5	M5A1G(3)1				0.5	M5A1G(3)1
																									0.14	7.74	0.69	A4BG1GlcNAc1		0.09	7.82
30	1.46	7.83	0.63	FA2BG2		1.89	7.82			1.53	7.82	0.7	FA2BG2		1.82	7.93	0.5	*FA2BG(3)2		1.76	7.81	0.93	FA2BG(3)2		1.38	7.84				1.28	7.93
			0.83	junk								0.83	junk				1.32	junk				0.83	junk				0.83	junk				1.28	junk
31	2.33	7.95	1.01	M7 D3		0.16	7.92			2.28	7.93	1.01	M7 D3		2.11	8.05	1.01	M7 D3		2.27	7.92	1.135	M7 D3		2.02	7.96	1.01	M7 D3		2.01	8.04	1.01	M7 D3
						0.11	7.96
			0.31	M4A1G1S(6)1								0.31	M4A1G1S(6)1
			1.01	M7 D1		0.1	7.99					1.01	M7 D1				1.01	M7 D1				1.135	M7 D1				1.01	M7 D1				1.01	M7 D1
32	0.53	8.05				0.05	8.05			0.22	8.02				0.3	8.15				0.19	8				0.41	8.1				0.21	8.15
						0.18	8.08			0.29	8.09
			0.18	*FA2G2S(6)1		0.09	8.13			0.05	8.17	0.14	FA2G2S(6)1																	0.21	8.19
			0.176667	FA2F1G2		0.1	8.16					0.14	FA2F1G2		0.51	8.22	0.9	FA2F1G2		0.69	8.08	0.9	FA2F1G2
			0.18	FA3G3								0.14	FA3G3				2.11	FA3G(3)3				2.5	FA3G(3)3		0.22	8.15				0.06	8.27
			0.18	FM5A2G1		0.22	8.18					0.14	FM5A2G1																	0.05	8.31
33	1.27	8.34				0.05	8.23			3.52	8.3				2.2	8.35				2.52	8.2
			0.9	FA2G2S(6)1								0.9	FA2G2S(6)1
			0.37	*A2G2S(6)1								2.62	A2G2S(6)1												0.19	8.26				0.08	8.34
						1.67	8.32								10.14	8.46				8.02	8.31				0.07	8.31				0.07	8.41
																									0.04	8.34				0.06	8.44
																	2.14	*A3G(4)3							0.06	8.38	0.36	A4G2GlcNAc2		0.06	8.52
																	8	*A3G(3)3				8.02	A3G(3)3
34	0.36	8.46	0.35	A2F2G2		0.16	8.41			0.49	8.43	0.48	A2F2G2		1.28	8.59	1.28	A2F2G2		0.98	8.44	0.98	A2F2G2		0.05	8.47	0.05	A2F2G2		0.05	8.57	0.05	A2F2G2
			0.01	FA2BG2S(6)1		0.46	8.48					0.01	FA2BG2S(6)1
35	0.96	8.55				1.03	8.53			1.05	8.53				1.29	8.66				1.13	8.52				0.82	8.56				0.82	8.65
																	1.29	FA2BF2G2				1.27	FA2BF2G2				0.82	FA2BF2G2				0.84	FA2BF2G2
			0.96	A2G2S(6)1		0.27	8.59					0.96	A2G2S(6)1
																				0.14	8.6
36	4.88	8.8	0.12	*FA2G2S(6)1		1.22	8.73			1.71	8.7	0.26	FA2G2S(6)1		1.4	8.84				0.99	8.69				0.12	8.67				0.08	8.75
			0.06	*A2F1G2S(6)1								0.26	A2F1G2S(6)1												0.1	8.71				0.08	8.78
			0.06	A2BF2G2								0.06	A2BF2G2				0.06	A2BF2G2				0.06	A2BF2G2				0.06	A2BF2G2				0.0233333	A2BF2G2
			0.01	A3F2G2								0.02	A3F2G2				0.02	A3F2G2				0.01	A3F2G2				0.01	A3F2G2				0.01	A3F2G2
			0.03	FA2F2G2								0.03	FA2F2G2				0.03	FA2F2G2				0.03	FA2F2G2				0.03	FA2F2G2				0.05	FA2F2G2
			0.06	FA2BG2S(6)1								0.26	FA2BG2S(6)1
			0.06	FA2BF1G1S(6)1								0.26	FA2BF1G1S(6)1				1.29	*FA3G(3)3				0.89	FA3G(3)3				0.04	FA3BF2G2				0.0233333	FA3BF2G2
			0.01	A3F1G3								0.01	A3F1G3				0.166	A3F1G3				0.133333	A3F1G3
			0.01	FA3G2S(6)1								0.26	FA3G2S(6)1
			0.01	FA3F1G1S(6)1								0.26	FA3F1G1S(6)1
			0.5	M5A1G1S(6)1		0.31	8.82			4.4	8.77	0.5	M5A1G1S(6)1		4.12	8.92				4.08	8.77				4.01	8.81				3.62	8.9
			0.27	FA3BG3								0.27	FA3BG3				0.44	*FA3BG(4)3				0.133333	FA3BG(3)3
			3.68	M8 D2,D3								3.68	M8 D2,D3				5.584	M8 D2,D3				3.68	M8 D2,D3				4.01	M8 D2,D3		0.06	8.97	3.68	M8 D2,D3
37	1.49	8.98	0.605	FA2F1G2S(6)1		0.21	8.9			0.89	8.94	0.725	FA2F1G2S(6)1		2.07	9.04				0.24	8.88				0.69	8.97				0.75	9.06
			0.605	FA2F2G2								0.725	FA2F2G2									0.99	A4BG(3)3GlcNAc1
			0.28	FA4BG3S(6)1		0.67	8.97			0.84	8.94	0.28	FA4BG3S(6)1							0.75	8.93				0.2	9.06
38	0.52	9.11				0.2	9.03			0.28	9.04				0.44	9.15	0.405	FA3F1G3		0.4	8.98	0.225	FA3F1G3		0.07	9.09
			0.45	*A2F1G2S(6)2								0.28	A2F1G2S(6)2																	0.08	9.18
																									0.07	9.16				0.04	9.25
			0.035	FA2BF2G2		0.53	9.09			0.14	9.1	0.07	FA2BF2G2				0.035	FA2BF2G2				0.035	FA2BF2G2				0.035	FA2BF2G2				0.02	FA2BF2G2
			0.035	FA3F2G2								0.07	FA3F2G2				0.14	FA3F2G2				0.14	FA3F2G2				0.035	FA3F2G2				0.02	FA3F2G2
39	1.63	9.21	0.16	FA2F1G2S(6)1		1.74	9.19			0.16	9.15	0.16	FA2F1G2S(6)1		0.14	9.2									0.06	9.21				0.12	9.32
			0.09	FA3F2G2S(6)1						0.09	9.18	0.09	FA3F2G2S(6)1		0.32	9.28				0.15	9.11				0.75	9.31
40	0.65	9.31				0.24	9.27			0.71	9.27																			0.47	9.4
															0.15	9.36				0.1	9.16
						0.76	9.31
			2.03	*A2G2S(3,6)2								0.71	A2G2S(6)2
41	0.41	9.41	0.4	*FA2G2S(6)2		0.48	9.43			0.24	9.35	0.23	FA2G2S(6)2		0.64	9.42	0.64	A4G(3)3GlcNAc2		0.66	9.26	0.66	A4G(3)3GlcNAc2							0.05	9.45
			0.01	A3F2G2S(6)1								0.01	A3F2G2S(6)1
42	2.35	9.53	0.04	FA2F1G2S(6)1		0.15	9.48			7.56	9.46	0.04	FA2F1G2S(6)1		2.64	9.65				0.08	9.34				0.15	9.43				0.05	9.53
			0.04	A3G3S(6)1								5.29	A3G3S(6)1							0.07	9.38
			0.04	A3F1G3S(6)1								0.04	A3F1G3S(6)1
						0.3	9.53													2.29	9.48				2.4	9.53				2.19	9.62
			0.04	FA3BF2G3								0.04	FA3BF2G3				0.04	FA3BF2G3				0.04	FA3BF2G3
			5.55	M9								2.4	M9				2.4	M9				1.78	M9				2.18	M9				1.82	M9
43	3.68	9.63	0.01	FA2F1G2S(6)1		2.74	9.62			3.15	9.56	0.01	FA2F1G2S(6)1
																						0.17	FA2F3G2GlcNAc1				0.17	FA2F3G2GlcNAc1				0.17	FA2F3G2GlcNAc1
			0.01	FA2BG2S(6)2								0.01	FA2BG2S(6)2
			0.2	FA2BF3G2								0.2	FA2BF3G2				0.2	FA2BF3G2				0.2	FA2BF3G2				0.2	FA2BF3G2				0.2	FA2BF3G2
			0.1	FA3G3S(6)1								2.68	FA3G3S(6)1
44	0.71	9.81				0.22	9.72			0.89	9.72				0.1	9.78				0.49	9.64
			0.71	A2G2S(6)2		0.75	9.78					0.89	A2G2S(6)2		0.75	9.83
45	0.33	9.88	0.12	A2G2S(6)2		0.33	9.85			0.31	9.84	0.155	A2G2S(6)2
			0.21	*A2BG2S(6)2		0.24	9.95					0.155	A2BG2S(6)2		0.04	9.93
										0.18	9.88				0.25	10.01				0.27	9.84
						0.14	9.98			0.57	9.97				0.27	10.1				0.78	10.05
46	0.91	10.08	0.09	FA2G2S(6)2		0.8	10.09			3.8	10.09	0.09	FA2G2S(6)2		0.07	10.13	0.75	A4BG(3)4Lac1
			0.09	A2F1G2S(6)2								0.09	A2F1G2S(6)2		1.18	10.23
			0.09	A3F1G3S(6)1								0.09	A3F1G3S(6)1				0.17	FA2F3G2Lac1
			0.64	A4BG4								0.64	A4BG4				0.64	*A4BG(3)4				0.78	A4BG(3)4
												1.94	FA3F1G3				0.44	FA3F1G3
47	0.84	10.21	0.62	FA3G3S(6)2		0.28	10.14					0.62	FA3G3S(6)2		0.72	10.36				0.5	10.2
			0.22	A3F2G3S(6)1		0.36	10.17					0.22	A3F2G3S(6)1
						0.36	10.22					0.11	A3F3G3				0.72	A3F3G3				0.5	A3F3G3
48	0.77	10.33				1.12	10.32			0.3	10.3				0.29	10.52				0.09	10.3
						0.25	10.38
49	0.29	10.43	1.06	*A3G3S(3,6)2						0.1	10.37	0.53	A3G3S(6)2		0.2	10.6				0.11	10.42
						0.14	10.47
						0.1	10.49								0.21	10.73				0.14	10.62
						0.12	10.53			0.13	10.43
50	0.1	10.61				0.2	10.58			0	10.51				0.05	10.83				0.05	10.68
										0.14	10.58
51	1	10.76	1	FA3G3S(6)2		0.26	10.64			0.19	10.61	1	FA3G3S(6)2		0.08	10.89
						0.98	10.8								0.24	11.01
										3.52	10.72
52	0.52	10.87				0.45	10.87			0.7	10.87				0.06	11.1
			0.35	*A3G3S(6)2								3.24	A3G3S(6)2
			0.17	FA3BG3S(6)2		0.18	10.9					0.17	FA3BG3S(6)2		0.08	11.16
53	0.25	10.98	0.25	*A3F3G3S(6)1		0.41	10.96			0.21	11.03	0.21	A3F3G3S(6)1
						0.18	11.03
54	4.72	11.19	0.17	FA2F3G2Lac1S(6)1		0.15	11.09			0.18	11.14	0.17	FA2F3G2Lac1S(6)1
			4.01	*A3G3S(3,3,6)3
			0.01	A3F2G2S(3)2		3.7	11.18			0.52	11.2
			0.53	A4BG4Lac1S(6)1								0.53	A4BG4Lac1S(6)1
55	0.67	11.33				0.2	11.28			0.05	11.31
						0.48	11.32
						0.29	11.41			1.2	11.4
56	0.42	11.47				0.23	11.45			0.43	11.54
						0.23	11.49
57	4.64	11.6	4.6	*A3G3S(3,6,6)3		3.67	11.59			0.15	11.67	0.15	A3G3S(6)3
			0.04	A3F3G3S(6)2						0.04	11.78	0.04	A3F3G3S(6)2
58	0.62	11.76				0.84	11.75			0.1	11.86
			0.62	*A3G3S(3)4		0.1	11.82			0.02	11.92	0.12	A3G3S(6)4
59	3.3	12.01				0.17	11.89			0.37	12.03
			2.54	FA3G3S(3,3,6)3		2.21	12.01
			0.01	A3F1G3S(3)3		0.35	12.15
			0.75	*A4G4Lac2S(6)1		0.28	12.2					0.37	A4G4Lac2S(6)1
						0.08	12.27
60	1.94	12.39				0.1	12.3
						0.95	12.38
			1.94	FA3F1G3S(3)3		0.35	12.51
						0.32	12.55
						0.22	12.61
						0.08	12.68
						0.07	12.72
61	0.53	12.83				0.54	12.79
						0.17	12.89
62	0.69	13.01				0.31	12.99
						0.36	13.07
Sum	100.02		96.7967			99.98				100.06		96.43			99.99		96.08			99.98		96.7267			99.99		93.775			99.94		94.8167
*=Major link

## Sheet: Cytoplasm CTRL
Cytoplasm CTRL		UND				JBM				NAN1					ABS					ABS+SPG					ABS+BTG					ABS+BTG+GUH
Peak number	% Area	GU	%area	Glycan		% Area	GU	Glycan		% Area	GU	%area	Glycan		% Area	GU	%area	Glycan		% Area	GU	%area	Glycan		% Area	GU	%area	Glycan		% Area	GU	%area	Glycan
1	17.75	4.13	17.75	junk		23.98	4.08			19.12	4.11	18.8	junk		18.03	4.27	18.03	junk		19.48	4.12	19.14	junk		0.06	4.07	17.26	junk		0.06	4.08	17.26	junk			UND	NAN1	ABS	ABS+SPG	ABS+BTG	ABS+BTG+GUH
			0.34	M3								0.34	M3				0.34	M3				0.34	M3		20.28	4.23	0.34	M3		17.26	4.19	11.57	M3		high mannose	21.3417	19.3417	18.66	19.63	17.3	36.38	22.1089
2	0.34	4.25				0.19	4.28			0.02	4.33				0.34	4.39														11.57	4.31				fucosylated high mannose	0.74	0.75	0.78	0.87	0.82	9.92	0.792	22.9009	total high mannose			BRANCHING
3	0.03	4.41				0.11	4.42			0.05	4.42				0.04	4.51				0.04	4.43				0.33	4.49				0.07	4.53				A1							0					A1= 1 antenna
										0.02	4.48				0.11	4.64				0.01	4.49									0.04	4.68				FA1	0.18	0.18	0.18	0.18	0.18	0.02	0.18					A2 =2 antennas
4	0.66	4.71				0.26	4.61			0.67	4.66				0.7	4.89				0.68	4.68				0.1	4.74				15.9	4.78	6.9	M3B/A1/		A1B	0.1	0.1	0.1	0.1	0.1		0.1		total			A3 =3 antennas
			0.66	FM3								0.67	FM3				0.7	FM3				0.68	FM3		0.63	4.83	0.63	FM3				9	FM3		FA1B	0.16	0.173333	0.18	0.18	0.18	0.12	0.174667	0.454667	monoantennary			A4 =4 antennas
5	8.85	4.84	8.85	junk		11.88	4.77			9.38	4.79	9.38	junk		9.12	5.02	9.12	junk		9.52	4.81	9.52	junk		10.17	4.96	10.17	junk		9.03	4.91	9.03	junk		A2	5.17	6.21	5.12	4.83	4.64		5.194
6	0.11	5.09				0.47	5.02			0.07	5.01				0.01	5.23				0.01	4.97				0.1	5.16				0.35	5.15				FA2	2.86722	2.86	2.79	3.54	2.78	0.06	2.96744
										0.05	5.09				0.12	5.25				0.03	5.04				0.08	5.27				0.91	5.25	0.79	FM3B		A2B	0.343333	0.343333	0.396667	0.546667	0.4	0.01	0.406
															0.03	5.35				0.02	5.08				0.07	5.33						0.12	M4		FA2B	1.68	2.4875	1.26	1.23	2	0.025	1.7315	10.2989	biantennary
7	0.22	5.28				0.33	5.37			0.13	5.21				0.02	5.4				0	5.18				4.74	5.49	0.1	A1B		0.02	5.39				A3	4.92833	4.77333	5.21667	5.07667	3.97	0.08	4.793
										0.05	5.26				0.16	5.48				0.11	5.24						0.18	FA1				0.02	FA1		FA3	1.0875	0.96	0.65	0.82	1.95	0.025	1.0935
										0.05	5.3				0.12	5.54				0.04	5.28						4.64	A2		0.01	5.46				A3B	0.5	0.5	0.5	0.5	0.5		0.5
																				0.18	5.31														FA3B	0.723333	0.576667	0.776667	0.926667	0.62	0.35	0.724667	7.11117	triantennary
																														0.03	5.53				A4	0.28	0.293333	0.7	0.56	0.59		0.484667
8	11.66	5.6				14.31	5.52			0.02	5.41				0.03	5.67				0.01	5.42				12.8	5.75				11.6	5.68				FA4	0.1175	0.1175	0.12	0.12	0.12	0.12	0.119
																				0.01	5.44											2	A1F1		A4B	0.71	0.71	0.71	1.09	0.21		0.686
			11.66	junk						12.06	5.56	12.06	junk		11.97	5.81	11.97	junk		12.42	5.57	11.47	junk				11.8	junk				9.1	junk		FA4B	0.13	0.13	0.13	0.11	0.11	0.02	0.122	1.41167	tetranantennary
9	0.62	5.82	0.07	FA1B		0.68	5.71			0.59	5.75	0.07	FA1B		0.51	6.04	0.07	FA1B		0.71	5.77	0.08	FA1B		6.83	5.97	0.18	FA1B		0.12	5.84	0.12	FA1B		Lac-total	1.06	1.07	0.75	0.88	0.94	0	0.94
										0.04	5.89				0.1	6.08											0.4	A2B		0.15	5.96	0.01	A2B		OAF-total	9.71417	9.86667	10.1333	9.64	8.82	8.65	9.47069
																				0.03	5.87	0.9	A3				3.97	A3				0.08	A3		junk	46.62	47.07	47.38	48.51	47.61	41.84
			0.55	FA2								0.56	FA2				0.61	FA2				0.71	FA2				2.78	FA2				0.06	FA2		sum	98.4531	98.5133	96.5333	99.34	93.84	97.62
																											0.5	A3B								98.4531	98.5133	96.5333	99.34	93.84	97.62
															0.07	6.13
																																0.5	FA1F1
10	1.88	6.15				0.33	5.89			0.01	5.95				1.58	6.39				0.02	6.01	0.43	A2F1		6.83	6.36	1.1	A2F1		0.08	6.15	0.08	A2F1		Total core fucose	12.7197	13.315	12.8067	13.6867	13.37	13.81	13.2847
			1.78	M5								1.49	M5				1.58	M5		2.35	6.12	1.66	M5				1.66	M5		1.66	6.24	1.66	M5		Total bisects	7.86833	8.5125	7.33333	7.98333	7.06		7.7515
						0.52	6.11			0.04	5.99				0.18	6.45						0.71	FA2B				2	FA2B				0.025	FA2B
																	0.18	FA1G(3)1				0.18	FA1G(3)1
										1.54	6.1																1.95	FA3				0.025	FA3		Lac:	UND	NAN1	ABS	ABS+SPG	ABS+BTG
																											0.12	M4A1							A2Lac
			0.1	A1BG1								0.1	A1BG1		0.1	6.51	0.1	A1BG(3)1				0.1	A1BG(3)1							0.05	6.34	0.13	FM5		FA2Lac	0.12	0.13	0.13	0.07	0.07
11	4.08	6.38	0.01	A2G1		4.92	6.28			0.06	6.21	0.06	A2G1		4.23	6.62	0.13	*A2G(3)1		5.27	6.35	1.17	A2G(3)1		4.1	6.55				3.98	6.48				A3Lac	0.18	0.18	0.18	0.3	0.39
			4.07	junk						4.11	6.33	4.11	junk				4.1	junk				4.1	junk				4.1	junk				3.24	junk		A4Lac	0.38	0.38	0.29	0.29	0.24
12	0.28	6.53	0.09	FA1BG1		0.52	6.43			0.31	6.46	0.103333	FA1BG1		0.34	6.78	0.11	*FA1BG(3)1		0.3	6.48	0.1	FA1BG(3)1		1.8	6.68				1.05	6.63	0.35	FA3B		FA4Lac	0	0	0	0	0
			0.09	A2BF1								0.103333	A2BF1				0.113333	A2BF1				0.1	A2BF1				0.1	A2BF1				0.35	A2BF1		A4BLac	0.38	0.38	0.15	0.22	0.24
			0.09	A3F1								0.103333	A3F1				0.11	A3F1				0.1	A3F1				1.11	A3F1				0.35	A3F1		total	1.06	1.07	0.75	0.88	0.94
																																			OAF:	UND	NAN1	ABS	ABS+SPG	ABS+BTG
																																			A1BF	0.12	0.1175	0.12	0.12	0.12
																																0.66	A1F1G1		FA1BF
13	0.31	6.64	0.103333	A2BG1		0.48	6.54			0.31	6.58	0.103333	A2BG1		0.47	6.89	0.156667	A2BG(3)1		0.92	6.6	0.306667	A2BG(3)1		0.62	6.78				0.15	6.79				A2F	1.84	1.705	1.49	1.13	1.37
			0.103333	A3G1								0.103333	A3G1				0.156667	*A3G(3)1				0.306667	A3G(3)1												FA2F	1.18	1.15333	0.56	0.62	0.66
			0.103333	FA3B								0.103333	FA3B				0.156667	FA3B				0.306667	FA3B				0.62	FA3B							A2BF	0.23	0.243333	0.253333	0.24	0.24
14	0.05	6.71				0.18	6.7			0.02	6.65				0.14	7.03				0.66	6.73				0.05	6.9	0.59	A4							FA2BF	1.50333	1.50333	1.32333	1.5	1.33
										0.02	6.71														0.16	6.94				0.04	6.87				A3F	2.49	2.65333	2.26	2.33	2.43
										0.03	6.74																0.21	A4B		0.03	6.93				FA3F	0.98	1.06333	2.51333	2.32	1.56
			0.05	FA2G1								0.07	FA2G1				0.14	*FA2G(3)1				0.66	FA2G(3)1												A3BF	0.12	0.1175	0.12	0.12	0.12
15	0.47	6.92	0.12	A1BF1G1		0.79	6.8			0.05	6.79	0.1175	A1BF1G1		0.6	7.18	0.12	A1BF1G1		0.98	6.88	0.12	A1BF1G1		0.77	7.1	0.12	A1BF1G1		0.28	7.01	0.12	A1BF1G1		FA3BF	0.34	0.34	0.34	0.34	0.35
			0.12	A2F1G1								0.1175	A2F1G1				0.12	A2F1G1				0.12	A2F1G1				0.12	A2F1G1				0.12	A2F1G1		A4F
			0.12	A3BF1						0.38	6.86	0.1175	A3BF1				0.12	A3BF1				0.12	A3BF1				0.12	A3BF1				0.12	A3BF1		FA4F	0.0825	0.1	0.1	0.1	0.1
			0.1175	FA4								0.1175	FA4				0.12	FA4				0.12	FA4				0.12	FA4		0.71	7.09	0.12	FA4		A4BF
																	0.12	M4A1G(3)1				0.12	M4A1G(3)1									0.51	FA1F1G1		FA4BF	0.828333	0.87	1.05333	0.82	0.54
										0.04	6.92											0.38	M5A1				0.29	M5A1							total	9.71417	9.86667	10.1333	9.64	8.82
16	4.02	7.06	2.01	M6D3						3.92	7.01	1.96	M6D3		3.78	7.32	1.89	M6D3		4.31	7.03	2.155	M6D3		3.89	7.24	1.945	M6D3		3.91	7.17	2.5	M6D3
			2.01	M6D1								1.96	M6D1				1.89	M6D1				2.155	M6D1				1.945	M6D1				2	M6D1		Galactosylation	UND	NAN1	ABS
						3.81	7.01																												G0	22.9425	20.9867	20.75	21.5597	no galactose
17	2.92	7.11	0.01	A2G2						3.02	7.08	1.5	A2G2		7.77	7.41	4.99	*A2G(3)2		6.44	7.1	3.66	A2G(3)2		3.06	7.29				2.61	7.23	0.17	FA1BF1G1		G1	2.29667	2.515	2.48333	2.43167	1 galactose
																											0.28	FA2F1G1				0.28	FA2F1G1		G2	14.4456	16.075	15.0333	15.1846	2 galactoses
			2.91	junk								1.52	junk				2.78	junk				2.78	junk				2.78	junk				2.16	junk		G3	9.75	9.10333	8.50333	9.11889	3 galactoses
18	0.39	7.34	0.13	FA4B		0.85	7.21			0.02	7.2	0.13	FA4B		0.13	7.55	0.13	FA4B		0.11	7.25	0.11	FA4B		0.26	7.42	0.11	FA4B		0.02	7.38	0.02	FA4B		G4	2.31583	2.37333	2.64333	2.44417	4 galactoses
			0.01	A2BG2								0.01	A2BG2		0.76	7.61	0.24	A2BG(3)2		0.82	7.31	0.24	A2BG(3)2		0.43	7.56				0.16	7.48				beta1-3				15.7433
			0.25	A3F1G1						0.51	7.28	0.39	A3F1G1		0.24	7.69	0.76	A3F1G1				0.82	A3F1G1		0.44	7.63	0.78	A3F1G1		0.12	7.56	0.12	A3F1G1		beta1-4				2.56
																																			both				0.2
																				2.49	7.51														total G				28.2933
19	0.03	7.46				0.34	7.33			0.14	7.36				0.08	7.76	0.08	A4G(3)1				0.08	A4G(3)1		0.53	7.66				0.01	7.61
																						0.45	FA3F1				0.53	FA3F1		0.03	7.67	0.03	FA3F1		Sialylation	UND
																				0.45	7.56				0.22	7.77				0.06	7.72				S0	31.8467				no sialic acid
20	0.46	7.55	1.415	FA2G2		0.73	7.44			1	7.49	0.92	FA2G2		2.26	7.82	2.04	*FA2G(3)2				2.17	FA2G(3)2												S1	8.42917				1 sialic acid
			0.22	M6A1								0.22	M6A1				0.22	M6A1		3.32	7.67	0.22	M6A1				0.22	M6A1							S2	7.55917				2 sialic acids
			0.08	FM5A2						0.07	7.58	0.08	FM5A2		0.08	7.89	0.08	FM5A2				0.19	FM5A2		0.56	7.9	0.19	FM5A2		0.13	7.81				S3	2.62583				3 sialic acids
21	2.52	7.71	0.18	FA1G1S(6)1		2.37	7.59			3.23	7.65	0.18	FA1G1S(6)1		4.45	7.98																			S4	1.24				4 sialic acids
			0.12	A2F1G2								1.2375	A2F1G2				1.1	A2F1G2				0.43	A2F1G2							0.03	7.86				alpha2-3	8.95389				total 2-3 linked
			0.5	FA2BG2								1.2375	FA2BG2				1.1	*FA2BG(4)2				0.43	FA2BG(3)2												alpha2-6	10.2125				total 2-6 linked
			0.19	FA2BF1G1								0.19	FA2BF1G1				0.19	FA2BF1G1				0.19	FA2BF1G1				0.19	FA2BF1G1				0.015	FA2BF1G1		both	0.82
			0.01	A3G2								0.12	A3G2				1.2	A3G(3)2				1.2	A3G(3)2												total S	19.9864				total sialylation
			0.01	FA3G2								0.01	FA3G2				0.54	FA3G(3)2				0.54	FA3G(3)2
			0.01	FA3F1G1								0.01	FA3F1G1				0.02	FA3F1G1				0.02	FA3F1G1				0.2	FA3F1G1				0.015	FA3F1G1
			0.1	A4BG1								0.1	A4BG1				0.1	A4BG(3)1				0.1	A4BG(3)1
			0.145	M5A1G1								0.145	M5A1G1									0	M5A1G(3)1
22	1.59	7.83	0.21	FA2BG2		1.87	7.72			1.59	7.78	0.39	FA2BG2		1.54	8.11	0.16	*FA2BG(3)2		1.62	7.8	0.09	FA2BG(3)2		1.53	8.03				1.45	7.96
																						0.03	A3G2GlcNAc2				0.03	A3G2GlcNAc2				0.4	FA2F2G2
			1.38	junk								1.2	junk				1.38	junk				1.5	junk				1.5	junk				1.05	junk
23	4.2	7.94	1.945	M7 D3		0.73	7.77			3.62	7.89	1.655	M7 D3		3.71	8.22	1.855	M7 D3		3.85	7.91	1.925	M7 D3		2.97	8.14	1.485	M7 D3		3.05	8.08	1.525	M7 D3
																											0.24	A4BG1GlcNAc1
			0.19	A3F1G1S(6)1								0.19	A3F1G1S(6)1
			0.12	M4A1G1S(6)1								0.12	M4A1G1S(6)1
			1.945	M7 D1								1.655	M7 D1				1.855	M7 D1				1.925	M7 D1				1.485	M7 D1				1.525	M7 D1
24	0.61	8.06	0.15	FA2G2S(6)1		0.73	7.94			0.4	8.05	0.15	FA2G2S(6)1		0.23	8.33				0.24	8				0.14	8.21				0.17	8.18
			0.01	FA2F1G2								0.01	FA2F1G2				0.11	FA2F1G2		0.56	8.08	0.28	FA2F1G2		0.24	8.29				0.12	8.23
			0.185	*A3G2S(6)1								0.08	A3G2S(6)1		0.22	8.41									0.28	8.35				0.05	8.3
			0.185	FA3G3								0.08	FA3G3				0.11					0.28	FA3G(3)3							0.05	8.33
			0.08	A4G1S(6)1								0.08	A4G1S(6)1
25	1.63	8.33	1.57	*A2G2S(6)1		1.62	8.19			3.7	8.25	3.06	A2G2S(6)1		0.88	8.54	0.88	FA3F2G2		0.65	8.2	0.65	FA3F2G2		0.37	8.47	0.65	FA3F2G2		0.12	8.41	0.25	FA3F2G2
																														0.03	8.46
			0.03	FA2G2S(6)1								0.03	FA2G2S(6)1		3.86	8.65				2.82	8.3				0.23	8.55				0.07	8.49
																														0.04	8.56
			0.03	A3G3								0.61	A3G3				0.2	A3G(4,4,3)3
																	2.8	A3G(3)3				2.67	A3G(3)3
																	0.86	A3G(4)3
26	0.45	8.45	0.27	A2F2G2		0.57	8.31			0.14	8.37	0.07	A2F2G2		0.27	8.73	0.27	A2F2G2				0.15	A2F2G2		0.15	8.68	0.15	A2F2G2		0.01	8.61	0.12	A2F2G2
			0.18	*FA2BG2S(3)1								0.07	FA2BG2S(6)1
27	1.79	8.54	0.08	A2G2S(6)1		1.35	8.42			1.3	8.49	0.08	A2G2S(6)1		1.07	8.86				1.25	8.51				1.04	8.77				0.94	8.7
			0.14	A2BF2G2								0.14	A2BF2G2				0.14	A2BF2G2				0.14	A2BF2G2				0.14	A2BF2G2				0.14	A2BF2G2
			0.15	A3BG3								0.5	A3BG3		0.5	8.91	0.5	A3BG(3)3		0.21	8.62	0.5	A3BG(3)3		0.42	8.9	0.24	A4G2GlcNAc2		0.17	8.82
28	7.17	8.79	0.01	FA2G2S(6)1		1.46	8.6			2.15	8.65	0.01	FA2G2S(6)1		1.44	9.07				1.09	8.68				5.07	9.03				5.85	8.95
			0.1	A2F1G2S(6)1						7.07	8.73	0.1	A2F1G2S(6)1		6.72	9.12				6.86	8.76
			0.14	FA2F2G2								0.14	FA2F2G2				0.14	FA2F2G2				0.14	FA2F2G2				0.14	FA2F2G2				0.14	FA2F2G2
			0.23	A2BG2S(6)1								0.23	A2BG2S(6)1
			0.18	FA2BG2S(6)1								0.18	FA2BG2S(6)1
			1.07	FA2F2G2								1.07	FA2F2G2				1.07	FA2F2G2				1.25	FA2F2G2				1.04	FA2F2G2				1.11	FA2BF2G2
			0.18	FA2BF1G1S(6)1								0.18	FA2BF1G1S(6)1
			0.01	A3F2G2								0.14	A3F2G2				0.15	A3F2G2				0.15	A3F2G2				0.15	A3F2G2				0.15	A3F2G2
			0.18	FA3G2S(6)1								0.18	FA3G2S(6)1
			0.04	A3F1G3								0.04	A3F1G3				0.98	A3F1G3				0.98	A3F1G3
			0.01	FA3F1G1S(6)1								0.01	FA3F1G1S(6)1														0.1	FA4F2G2				0.1	FA4F2G2
																						0.06	FA4BF2G2				0.06	FA4BF2G2				0.06	FA4BF2G2
			0.145	M5A1G1S(6)1								0.145	M5A1G1S(6)1
			0.473333	FA3BG3								0.473333	FA3BG3				0.62	FA3BG(3)3				0.62	FA3BG(3)3
			5.82167	M8 D2,D3								6.87167	M8 D2,D3				6.13	M8 D2,D3				5.57	M8 D2,D3				4.9	M8 D2,D3				5.26	M8 D2,D3
29	1.41	8.98	0.07	FA2F1G2S(6)1		1.61	8.85			0.14	8.83	0.07	FA2F1G2S(6)1		0.31	9.29				0.2	8.91				0.35	9.19	0.35	FA3BF2G2		0.12	9.12	0.12	FA3BF2G2
			0.1	FA2F2G2								0.1	FA2F2G2				0.31	FA2F2G2				0.2	FA2F2G2				0.24	FA2F2G2		0.12	9.13	0.12	FA2F2G2
										1.92	8.9				0.91	9.38	0.91	FA3F1G3		0.34	8.96	0.87	FA3F1G3		0.24	9.3				0.23	9.18
			1.24	*A3G3S(6)1								1.92	A3G3S(6)1							0.53	8.98	0.27	A3G(3)3GlcNAc3				0.36	A3G3GlcNAc3
30	1.43	9.17	1.12	*A2F1G2S(3)2						0.25	9.07	0.07	A2F1G2S(6)2		0.23	9.5				0.22	9.08	0.22	A4BG(3)4GlcNAc1		0.21	9.4				0.02	9.32
			0.03	FA2BF2G2		0.83	9.03			0.07	9.11	0.03	FA2BF2G2		0.1	9.56	0.03	FA2BF2G2		0.21	9.13	0.03	FA2BF2G2		0.18	9.46	0.03	FA2BF2G2		0.13	9.35	0.02	FA2BF2G2
			0.25	A3G3S(6)1								0.25	A3G3S(6)1				0.0333333	FA3F1G3				0.0333333	FA3F1G3
										0.06	9.15
			0.03	FA3F2G2								0.03	FA3F2G2				0.03	FA3F2G2				0.146667	FA3F2G2				0.18	FA3F2G2				0.13	FA3F2G2
31	0.61	9.28	0.21	FA2F1G2S(6)1		0.96	9.14			0.64	9.23	0.213333	FA2F1G2S(6)1		0.62	9.66				0.77	9.25	0.29	A4G(3)3GlcNAc2		0.75	9.54				0.61	9.45
			0.2	FA3F2G2S(6)1								0.213333	FA3F2G2S(6)1
			0.2	A4G4								0.213333	A4G4				0.62	*A4G(3)4				0.48	A4G(3)4
32	0.61	9.4	0.1	A2G2S(3)2		0.73	9.28			0.06	9.33				0.1	9.77				0.06	9.35				0.14	9.65				0.05	9.55
			0.0322222	FA2G2S(3)2
			0.03	FA2F2G2S(3)1
			0.0333333	FA2BF2G2								0.0333333	FA2BF2G2				0.0333333	FA2BF2G2		0.07	9.37	0.03	FA2BF2G2				0.07	FA2BF2G2				0.025	FA2BF2G2
			0.01	A3F2G2S(3)1																		0.07	FA2F3G2GlcNAc1				0.07	FA2F3G2GlcNAc1				0.025	FA2F3G2GlcNAc1
			0.35	A3BG3S(3)1
			0.03	A3G2Lac2								0.03	A3G2Lac2				0.03	A3G(4)2Lac2
33	3.38	9.5	0.01	FA2F1G2S(6)1		3.06	9.45			5.68	9.45	0.01	FA2F1G2S(6)1		3.37	9.89				3.77	9.47				2.91	9.77				3.32	9.69
			0.09	*A3G3S(6)1								1.2	A3G3S(6)1
			0.01	*A3F1G3S(6)1								1.2	A3F1G3S(6)1				0.1	FA4F2G3				0.1	FA4F2G3
			0.15	FA3F2G3								0.15	FA3F2G3				0.15	FA3F2G3				0.15	FA3F2G3
			0.34	FA3BF2G3								0.34	FA3BF2G3				0.34	FA3BF2G3				0.34	FA3BF2G3
			4.86	M9								2.78	M9				2.78	M9				3.18	M9				2.91	M9				3.32	M9
34	4.71	9.59								1.93	9.51				0.13	10.06				0.31	9.65				0.39	9.91				0.05	9.85
			0.61	FA2F1G2S(6)1								0.61	FA2F1G2S(6)1																	0.08	9.86
			0.61	FA2BG2S(6)2								0.61	FA2BG2S(6)2		0.34	10.13									0.3	10.09				0.02	9.95
			0.61	FA3G3S(6)1								0.61	FA3G3S(6)1
35	0.54	9.85				0.72	9.66			0.34	9.68				0.3	10.28				0.27	9.83				0.36	10.14				0.03	9.98
			1.34	*A2G2S(3)2								0.34	A2G2S(6)2				0.15	A4BG(4)4Lac1												0.25	10.04
36	1.16	10.01				0.88	9.86			0.51	9.83	0.1	FA2F3G2Lac1		1.3	10.5	0.13	FA2F3G(4)2Lac1		0.99	10.03				0.23	10.21				0.01	10.14
			1.16	*A2G2S(6)2								1.03	A2G2S(6)2																	0.01	10.16
						0.99	9.91			0.52	9.97	0.08	FA4BF2G4				0.08	FA4BF2G4							0.58	10.34				0.32	10.25
37	1.46	10.15	0.63	*FA2G2S(6)2		1.13	10.04			1.61	10.09	1.12	FA2G2S(6)2		1.1	10.63				0.7	10.17				0.12	10.43				0.06	10.32
			0.11	A2F1G2S(6)2						0.83	10.2	0.11	A2F1G2S(6)2												0.48	10.54				0.03	10.39
			0.11	A3F1G3S(6)1								0.11	A3F1G3S(6)1																	0.2	10.45
			0.61	A4BG4								0.61	A4BG4				0.61	*A4BG(3)4				0.99	A4BG(3)4
												0.49	FA3F1G3				0.49	FA3F1G3
																						0.7	FA4BF4G2				0.48	FA4BF4G2				0.2	FA4BF4G2
										0.31	10.25	0.31	A3F3G3				0.26	A3F3G3		0.07	10.28	0.28	A3F3G3				0.39	A3F3G3				0.1	A3F3G3
38	0.93	10.67	0.9	*A2G2S(3)2		0.43	10.27			0.14	10.35	0.14	A2G2S(6)2		0.32	10.83				0.14	10.38				0.39	10.65
			0.01	A3G3S(6)2						0.08	10.42	0.07	A3G3S(6)2
			0.01	A3F2G3S(6)1						0.08	10.46	0.08	A3F2G3S(6)1
			0.01	FA3G3S(6)2		0.65	10.38			0.07	10.51	0.08	FA3G3S(6)2							0.2	10.62
										0.09	10.58
										0.06	10.63	0.06	FA4BF2G4				0.06	FA4BF2G4				0.06	FA4BF2G4
						2.21	10.56			0.06	10.66				0.43	11.3				0.25	10.81
										1.04	10.78
39	0.82	10.82	0.146667	A3G3S(3)2						0.37	10.88
			0.146667	A3F3G3S(3)1
			0.146667	FA3BG3S(3)2
			0.38	A4BG4Lac1S(6)1						0.01	11	0.38	A4BG4Lac1S(6)1
40	1.62	11.1	0.96	*A3G3S(3)3		1.21	10.98			0.03	11.04	0.11	A3G3S(6)3		0.2	11.44
			0.12	*FA2F3G2Lac1S(3)1						0.02	11.09	0.03	FA2F3G2Lac1S(6)1
			0.4	*A3F1G3S(3,6)2						0.03	11.13	0.03	A3F1G3S(6)2
			0.14	*A3F2G2S(3)2						0.11	11.15	0.02	A3F2G2S(6)2
41	0.62	11.38	0.29	A4G4Lac2		0.9	11.24			0.29	11.25	0.29	A4G4Lac2		0.29	11.79	0.29	A4G(4)4Lac2
			0.0825	FA3G3S(3)3
			0.0825	FA4F2G3S(6)2								0.1	FA4F2G3S(6)2
			0.0825	FA4BF2G4S(3)1
			0.0825	FA4BF4G4						0.1	11.39	0.1	FA4BF4G4		0.25	11.89	0.25	FA4BF4G4
42	2.08	11.51	0.663333	*A3G3S(3)3		1.48	11.4			0.63	11.48	0.31	A3G3S(6)3		0.61	12
			0.09	*FA3F1G3S(6)2						0.31	11.61	0.16	FA3F1G3S(6)2
			0.663333	*A3F3G3S(3)2						0.16	11.68	0.04	A3F3G3S(6)2
			0.663333	FA4BF4G4						0.04	11.77	0.63	FA4BF4G4				0.663333	FA4BF4G4
43	1.91	12.07	0.15	A3G3Lac3		1.9	11.88			0.06	11.84	0.15	A3G3Lac3				0.15	A3G3Lac3
			1.24	A3G3S(3)4						0.07	11.87
										0.02	11.93
			0.42	A3F1G3S(3,6)3						0.09	11.97
			0.01	FA3G3S(3)3
			0.09	A4G4Lac2S(6)1								0.09	A4G4Lac2S(6)1
44	0.49	12.28	0.49	FA3F1G3S(3)3		2.1	12.47
45	0.33	12.46
46	0.21	12.73
47	0.58	13.05				1.85	12.8
Sum	99.99		98.4531			100.02				99.95		98.5133			100.02		96.5333			99.99		99.34			99.98		93.84			100.01		97.62
*=Major link

## Sheet: Cytoplasm Treated
Cytoplasm Treated		UND				JBM				NAN1					ABS					ABS+SPG					ABS+BTG					ABS+BTG+GUH
Peak number	% Area	GU	%area	Glycan		% Area	GU	Glycan		% Area	GU	%area	Glycan		% Area	GU	%area	Glycan		% Area	GU	%area	Glycan		% Area	GU	%area	Glycan		% Area	GU	%area	Glycan
1	21.61	4.15	20.33	junk		26.76	4.07			0.04		21.99	junk		25.49	4.11	23.49	junk		22.34	4.13	20.09	junk		21.6	4.05	19.35	junk		0.1	4.03	19.35	junk
			2.25	M3						21.99	4.13	0.01	M3				2.25	M3				2.25	M3				2.25	M3		19.35	4.15	10.45	M3			UND	NAN1	ABS	ABS+SPG	ABS+BTG	ABS+BTG+GUH
2	0.97	4.26				0.29	4.24			0.01	4.35				0.25	4.29														10.45	4.27				high mannose	17.8633	17.7325	17.36	18.365	17.9	35.045	20.711
3	0.33	4.39				0.09	4.34			0.03	4.44				0.14	4.42				0.05	4.45				0.04	4.37				0.06	4.48				fucosylated high mannose	0.96	0.91	1.04	1.07	1.02	9.9	1	21.711	total high mannose			BRANCHING
										0.01	4.5				0.05	4.49				0	4.52				0.04	4.52									A1							0					A1= 1 antenna
4	0.7	4.73				0.09	4.54			0.65	4.68				0.7	4.69				0.68	4.69				0.63	4.61				0.02	4.64				FA1												A2 =2 antennas
																														18.94	4.73	9.94	M3B/A1/		A1B	0.57	0.59	0.57	0.57	0.57		0.574		total			A3 =3 antennas
			0.7	FM3								0.65	FM3				0.7	FM3				0.68	FM3				0.63	FM3				9	FM3		FA1B	0.323333	0.3	0.353333	0.203333	0.32	0.01	0.3	0.874	monoantennary			A4 =4 antennas
5	10.2	4.86	10.2	junk		12.73	4.75			9.48	4.81	9.48	junk		11.38	4.81	11.38	junk		9.91	4.83	9.91	junk		9.44	4.73	9.44	junk		8.96	4.86	8.96	junk		A2	2.4425	2.2625	2.55	2.6	2.84		2.539
6	0.36	5.04				0.16	5.02			0.07	4.99				0.05	5				0.06	5				0.11	4.92				0.6	5.1				FA2	1.625	2.30472	1.51	2.72	2.57	0.04	2.14594
										0.08	5.08				0.3	5.05				0.03	5.03				0.07	4.99						0.6	FM3B		A2B	1.105	1.835	2.06	2.1675	1.2	0.02	1.6735
															0.05	5.13				0.07	5.09				0	5.05				0.41	5.19	0.41	M4		FA2B	1.25556	1.42556	1.15	1.99	1.74	0.12	1.51222	7.75517	biantennary
7	0.23	5.3				0.32	5.21			0.2	5.24				0.05	5.18				0.01	5.15				3.41	5.22									A3	5.915	5.09667	3.94	4.415	4.17	0.08	4.70733
			0.14	A1B						0.02	5.29	0.22	A1B		0.14	5.24	0.14	A1B		0.14	5.25	0.14	A1B				0.57	A1B							FA3	1.53556	1.32556	0.855	1.21	1.74	0.215	1.29322
			0.09	A2						0.02	5.31	0.02	A2		0.27	5.32	0.27	A2		0.1	5.28	0.32	A2				2.84	A2							A3B	0.1025	0.2625	0.22	0.22	0.13		0.187
																				0.22	5.32									0.02	5.37				FA3B	0.93	0.936667	0.83	0.83	0.86	0.278333	0.877333	7.03289	triantennary
																																			A4	0.27	0.2	0.43	0.43	0.33		0.332
8	12.15	5.62				14.3	5.48			0.01	5.46				0.03	5.42				0.02	5.4				10.58	5.47				0.02	5.45				FA4	0.635	0.675	0.455	0.455	0.45	0.15	0.534
																				0.01	5.44									0.02	5.49	3.6	A1F1		A4B	0.15	0.15	0.15	0.15	0.15		0.15
			12.15	junk						10.51	5.56	10.51	junk		12.5	5.58	12.5	junk		11.4	5.59	10.43	junk				10.58	junk		10.31	5.62	6.01	junk		FA4B	0.57	0.57	0.86	0.86	0.57	0.1025	0.686	1.702	tetranantennary
9	0.67	5.83	0.17	FA1B		0.97	5.67			0.45	5.75	0.17	FA1B		0.65	5.8	0.17	FA1B		1.05	5.79	0.02	FA1B		8.39	5.68	0.32	FA1B		0.15	5.77	0.01	FA1B		Lac-total	3.09	2.44	2.74	2.9	2.32		2.698
																	0.65	A2B				2	A2B				1.2	A2B				0.02	A2B		OAF-total	9.06722	9.74333	8.78167	10.0908	9.57333	10.3142	9.42801
																											4.17	A3				0.08	A3		junk	49.97	49.47	52.5	50.39	49.4367	40.885
			0.5	FA2								0.33	FA2				0.19	FA2				0.08	FA2				2.57	FA2				0.04	FA2		sum	98.38	98.46	98.355	101.637	97.89	97.16
										0.05	5.86				0.19	5.88				0.08	5.89	0.09	A3B				0.13	A3B		0.12	5.92					98.38	98.46	98.355	101.637	97.89	97.16
															0.17	5.92
																				0.02	5.96											0.7	FA1F1		Total core fucose	14.2175	14.5028	12.9283	14.3233	13.99	14.2033	13.825
10	1.46	6.17				0.19	5.86			0.01	5.95				1.48	6.14				2.58	6.17	0.22	FA2B		8.11	6.06	1.74	FA2B				0.12	FA2B		Total bisects	8.13472	9.02694	10.1217	8.95167	7.47833		8.54167
						0.6	6.05			0.02	6.01				0.24	6.21						0.2	FA3				1.74	FA3		1.73	6.16	0.215	FA3
			0.24	A1BF1								0.24	A1BF1				0.24	A1BF1				0.24	A1BF1				0.24	A1BF1				0.24	A1BF1
			0.43	A1BG1						1.3	6.1	0.37	A1BG1		0.29	6.29	0.43	A1BG(3)1		5.05	6.37	0.43	A1BG(3)1
			0.01	A2F1								0.01	A2F1				1.48	A2F1				2.34	A2F1				3.05	A2F1				0.215	A2F1		Lac:	UND	NAN1	ABS	ABS+SPG	ABS+BTG
			0.93	M5								0.71	M5				0.93	M5				0.93	M5				0.93	M5				1.06	M5		A2Lac
																											0.41	M4A1							FA2Lac	1.61	1.1	1.1	1.1	1.1
																														0.04	6.28				A3Lac	0.59	0.37	0.37	0.77	0.59
11	4.2	6.4	0.59	A2G1		5.21	6.24			0.1	6.21	0.1	A2G1		4.21	6.36	0.7	A2G(3)1				0.7	A2G(3)1		3.81	6.24				3.61	6.39				A4Lac	0.63	0.71	0.69	0.55	0.37
			3.61	junk						3.87	6.34	3.87	junk				3.51	junk				4.93	junk				5.09667	junk				3.61	junk		FA4Lac
12	0.46	6.54	0.153333	FA1BG1		0.68	6.36			0.39	6.47	0.13	FA1BG1		0.55	6.5	0.183333	FA1BG(3)1		0.46	6.5	0.183333	FA1BG(3)1		2.77	6.36				1.01	6.54				A4BLac	0.26	0.26	0.58	0.48	0.26
			0.153333	A2BF1								0.13	A2BF1				0.183333	A2BF1				0.153333	A2BF1				0.153333	A2BF1				0.153333	A2BF1		total	3.09	2.44	2.74	2.9	2.32
			0.153333	A3F1								0.13	A3F1				0.183333	A3F1				0.13	A3F1				1	A3F1				0.278333	A3F1
																																			OAF:	UND	NAN1	ABS	ABS+SPG	ABS+BTG
																											0.86	FA3B				0.278333	FA3B		A1BF	0.24	0.24	0.24	0.24	0.24
																																			FA1BF	0.15	0.15	0.15	0.1575	0.15
																																0.3	FM5		A2F	2.025	2.23222	2.175	3.83	4.04
13	0.31	6.66				0.4	6.52			0.37	6.58				0.73	6.61				1.34	6.62				0.86	6.48	0.33	A4		0.25	6.68				FA2F	1.26583	1.68806	1.01	1.7875	1.14
			0.155	A2BG1								0.185	A2BG1				0.01	A2BG(3)1				0.01	A2BG(3)1												A2BF	0.333333	0.392222	0.363333	0.333333	0.333333
			0.155	A3G1								0.185	A3G1				0.72	A3G(3)1				1.33	A3G(3)1												FA2BF	1.495	1.465	1.125	0.98	0.655
14	0.06	6.73				0.11	6.64			0.03	6.64				0.44	6.75				1.26	6.74				0.03	6.58	0.15	A4B		0.04	6.79				A3F	1.68583	1.84361	1.90833	1.4425	1.64
			0.06	FA2BG1						0.03	6.71	0.03	FA2BG1				0.44	*FA2BG(3)1				1.26	FA2BG(3)1		0.12	6.64									FA3F	1.22222	1.21222	1.03	0.95	1.075
										0.04	6.72																			0.03	6.85				A3BF	0.01	0.01	0.01	0.01	0.01
15	0.43	6.94	0.01	A3BF1		0.79	6.76			0.07	6.83	0.01	A3BF1		0.51	6.91	0.01	A3BF1		1.38	6.9	0.01	A3BF1		1.49	6.77	0.01	A3BF1		0.16	6.9	0.01	A3BF1		FA3BF	0.07	0.07	0.07	0.07	0.07
			0.42	FA4						0.4	6.86	0.46	FA4				0.24	FA4				0.24	FA4				0.45	FA4				0.15	FA4		A4F
																																			FA4F
																														0.94	6.98				A4BF
																	0.01	M5A1				0.01	M5A1				0.13	M5A1							FA4BF	0.57	0.44	0.7	0.29	0.22
																	0.41	M4A1G(3)1				0.41	M4A1G(3)1												total	9.06722	9.74333	8.78167	10.0908	9.57333
										0.04	6.94						0.01	A2F1G1				0.71	A2F1G1				0.9	A2F1G1				0.94	A2F1G1
16	3.92	7.08	1.96	M6D3		3.78	6.97			3.88	7.02	1.94	M6D3		3.16	7.04	1.94	M6D3		4.98	7.04	1.94	M6D3		4.15	6.91	1.94	M6D3		3.87	7.06	1.935	M6D3
			1.96	M6D1								1.94	M6D1				1.94	M6D1				1.94	M6D1				1.94	M6D1				2.1	M6D1		Galactosylation	UND	NAN1	ABS
																																			G0	20.01	19.6625	21.3767	20.3497	no galactose
17	2.66	7.13	2.66	junk						2.66	7.08	2.65	junk		4.07	7.12	0.77	junk		3.57	7.11	3.09	junk		3.48	6.98	3.75	junk		2.1	7.1	1.935	junk		G1	4.66056	4.11722	4.78833	4.52204	1 galactose
																																			G2	12.3336	15.1972	10.02	12.6703	2 galactoses
																																			G3	9.55583	8.28306	6.62	8.15296	3 galactoses
			0.01	A2G2								0.01	A2G2				1.58	A2G(3)2				1.58	A2G(3)2												G4	1.85	1.73	2.36	1.98	4 galactoses
18	0.08	7.32				1.1	7.18			0.07	7.17				0.17	7.24				0.14	7.26				0.17	7.12				0.04	7.27				beta1-3				14.0133
																																			beta1-4				3.28
19	0.48	7.36													0.6	7.33				0.92	7.33				0.48	7.2				0.27	7.33				both				0.5
			0.15	FA1BF1G1						0.77	7.29	0.15	FA1BF1G1				0.15	FA1BF1G1				0.1575	FA1BF1G1				0.15	FA1BF1G1				0.1025	FA1BF1G1		total G				24.4683
			0.15	FA2F1G1								0.15	FA2F1G1				0.15	FA2F1G1				0.1575	FA2F1G1				0.8	FA2F1G1				0.1025	FA2F1G1
			0.18	A2BG2								0.47	A2BG2				1.4	*A2BG(4)2				0.1575	A2BG(3)2												Sialylation	UND
																	0.15	A3F1G1				0.1575	A3F1G1				0.15	A3F1G1				0.1025	A3F1G1		S0	31.5583				no sialic acid
															0.23	7.38						0.29	FA4B				0.57	FA4B				0.1025	FA4B		S1	9.68083				1 sialic acid
20	0.06	7.48				0.18	7.29			0.15	7.36				0.09	7.46	0.09	A4G(3)1		2.39	7.51	0.19	A4G(3)1		0.54	7.32				0.14	7.4	0.2	FA1F1G1		S2	4.20083				2 sialic acids
																									0.48	7.33				0.06	7.5				S3	1.69				3 sialic acids
21	0.57	7.56	0.29	FA2G2		0.78	7.38			1.57	7.49	1.29	FA2G2		1.6	7.53	1.32	*FA2G(3)2				2.64	FA2G(3)2		0.18	7.44				0.04	7.57				S4	1.28				4 sialic acids
			0.18	M6A1								0.18	M6A1				0.18	M6A1		1.01	7.59	0.18	M6A1				0.18	M6A1							alpha2-3	5.085				total 2-3 linked
			0.1	FM5A2								0.1	FM5A2		0.1	7.61	0.1	FM5A2				0.39	FM5A2		0.39	7.49	0.39	FM5A2		0.03	7.65	0.07	FA1BF1G1		alpha2-6	11.2167				total 2-6 linked
22	2.53	7.73	0.455	A2F1G2		3.16	7.54			3.63	7.66	1.155	A2F1G2		2.91	7.7	0.405	A2F1G2		2.47	7.69	0.5	A2F1G2		0.37	7.54				0.18	7.68				both	0.55
			0.3	FA2BG2								0.5	FA2BG2				0.5	*FA2BG(3)2				0.3	FA2BG(3)2												total S	16.8517				total sialylation
			0.5	FA2BF1G1								0.5	FA2BF1G1				0.5	FA2BF1G1				0.5	FA2BF1G1				0.185	FA2BF1G1				0.09	FA2BF1G1
			0.5	A3G2								0.5	A3G2				0.5	*A3G(3)2				0.265	A3G(3)2
			0.3	FA3G2								0.5	FA3G2				0.5	*FA3G(3)2				0.3	FA3G(3)2
			0.4	FA3F1G1								0.4	FA3F1G1				0.4	FA3F1G1				0.4	FA3F1G1				0.185	FA3F1G1				0.09	FA3F1G1
			0.075	A4BG1								0.075	A4BG1				0.075	A4BG(3)1				0.075	A4BG(3)1
																	0.13	M5A1G(3)1				0.13	M5A1G(3)1
																						0.31	A3G2GlcNAc2				0.31	A3G2GlcNAc2		0.06	7.72
23	1.23	7.84	0.21	FA2BG2		1.58	7.67			1.18	7.8	0.21	FA2BG2		1.06	7.81	0.21	FA2BG(3)2		1.3	7.82	0.21	FA2BG(3)2		1.51	7.67				1.02	7.82
																											0.26	A4BG1GlcNAc1
			1.02	junk								0.97	junk				0.85	junk				1.94	junk				1.22	junk				1.02	junk
24	3.71	7.96	1.475	M7 D3		0.46	7.73			3.82	7.9	1.53	M7 D3		2.76	7.93	1.38	M7 D3		4.11	7.93	1.475	M7 D3		3.23	7.78	1.475	M7 D3		2.95	7.93	1.475	M7 D3
			0.35	A3F1G1S(6)1								0.35	A3F1G1S(6)1
			0.41	M4A1G1S(6)1								0.41	M4A1G1S(6)1
			1.475	M7 D1								1.53	M7 D1				1.38	M7 D1				1.475	M7 D1				1.475	M7 D1				1.475	M7 D1
25	0.32	8.06	0.16	A4G1S(6)1		0.59	7.88			0.37	8.07	0.16	A4G1S(6)1		0.24	8.03				0.26	8.03				0.11	7.87				0.18	8.01
			0.16	FM5A2G1								0.16	FM5A2G1				0.24	FM5A2G(4)1							0.24	7.9				0.13	8.07
26	0.13	8.13	0.11	FA2F1G2								0.03	FA2F1G2		0.24	8.1	0.24	FA2F1G2		0.81	8.11	1.07	FA2F1G2		0.36	7.98				0.1	8.12
			0.01	FA2G2S(6)1								0.01	FA2G2S(6)1
			0.01	A3G2S(6)1								0.01	A3G2S(6)1
																														0.08	8.16
27	1.47	8.35	0.01	A2G2S(6)1		1.65	8.15			3.33	8.27	0.5	A2G2S(6)1		0.86	8.23	0.86	FA4BG(3)3		0.57	8.22	0.57	FA4BG(3)3		0.37	8.06				0.13	8.24
																														0.06	8.29
			0.2	FA2G2S(6)1								0.2	FA2G2S(6)1		2.72	8.33				1.99	8.32				0.33	8.2				0.04	8.32
																														0.08	8.35
			1.26	A3G3								2.63	A3G3				0.5	A3G(4,4,3)3
																	2.22	*A3G(3)3				2.82	A3G(3)3
28	0.46	8.47	0.46	A2F2G2		0.71	8.25			0.19	8.4	0.19	A2F2G2		0.28	8.43	0.28	A2F2G2				0.28	A2F2G2		0.09	8.27	0.09	A2F2G2		0.05	8.4	0.1	A2F2G2
																														0.05	8.47
29	1.19	8.57	1.01	A2G2S(6)1		1.14	8.37			1.16	8.51	1.01	A2G2S(6)1		0.89	8.53				1.11	8.53				0.64	8.37				0.7	8.52
															0.4	8.6				0.26	8.62				0.31	8.5	0.82	FA3F1G1		0.19	8.63	0.095	FA3F1G1
			0.18	A2BF2G2								0.262222	A2BF2G2				0.18	A2BF2G2				0.18	A2BF2G2				0.18	A2BF2G2				0.18	A2BF2G2
																	0.22	*A3BG(3)3				0.13	A3BG(3)3				0.37	A4G2GlcNAc2
30	6.22	8.81	0.2	*FA2G2S(6)1		1.7	8.54			2.83	8.67	0.262222	FA2G2S(6)1		1.18	8.7	0.355	*FA3G(3)3		0.77	8.7	0.71	FA3G(3)3		5.36	8.61				4.81	8.76
			0.03	*A2F1G2S(6)1								0.262222	A2F1G2S(6)1
			0.18	FA2BF2G2								0.15	FA2BF2G2				0.18	FA2BF2G2				0.13	FA2BF2G2				0.13	FA2BF2G2				0.095	FA2BF2G2
			0.18	A3F2G2								0.262222	A3F2G2				0.18	A3F2G2				0.18	A3F2G2				0.18	A3F2G2				0.18	A3F2G2
			0.262222	*FA2BG2S(6)1								0.262222	FA2BG2S(6)1
			0.37	FA2BF1G1S(6)1						5.68	8.75	0.37	FA2BF1G1S(6)1							5.73	8.78
			0.18	FA2F2G2								0.262222	FA2F2G2		3.94	8.77	0.18	FA2F2G2				0.18	FA2F2G2				0.18	FA2F2G2				0.18	FA2F2G2
			0.262222	FA3G2S(6)1								0.262222	FA3G2S(6)1														0.07	FA3BF2G2				0.07	FA3BF2G2
			0.18	A3F1G3								0.262222	A3F1G3				0.285	A3F1G3				0.285	A3F1G3
			0.262222	FA3F1G1S(6)1								0.262222	FA3F1G1S(6)1
			0.13	M5A1G1S(6)1								0.13	M5A1G1S(6)1
			0.83	FA3BG3								0.9	FA3BG3				0.83	FA3BG(3)3				0.83	FA3BG(3)3
			3.70333	M8 D2,D3								4.75	M8 D2,D3				3.8	M8 D2,D3				4.135	M8 D2,D3				4.75	M8 D2,D3				4.2	M8 D2,D3
31	1.28	9.01	0.01	FA2F1G2S(3)1		1.36	8.79			0.16	8.82				0.44	8.9				0.16	8.92				0.16	8.77				0.09	8.93
			0.01	FA2F2G2						2.11	8.92	0.44	FA2F2G2				0.44	FA2F2G2		0.22	8.96	0.38	FA2F2G2				0.16	FA2F2G2		0.11	8.94	0.2	FA2F2G2
			0.14	*A3G3S(6)1								1.26	A3G3S(6)1		0.69	9.01				0.48	9.02				0.26	8.85				0.32	8.98
			0.57	FA4BG3S(6)1								0.57	FA4BG3S(6)1									0.46	A3G3GlcNAc3				0.28	A3G3GlcNAc3
																	0.69	A3F2G3		0.36	9.14	0.36	A3F2G3		0.05	8.91	0.31	A3F2G3				0.32	A3F2G3
32	0.57	9.14	0.22	*A2F1G2S(6)2		1.54	8.96			0.33	9.08	0.155	A2F1G2S(6)2		0.25	9.1				0.21	9.17				0.14	9.02				0.06	9.12
			0.07	FA2BF2G2								0.07	FA2BF2G2				0.07	FA2BF2G2				0.07	FA2BF2G2				0.12	FA2BF2G2				0.06	FA2BF2G2
			1.01	*A3G3S(6)1								0.155	A3G3S(6)1				0.11	FA3F1G3				0.03	FA3F1G3
			0.07	FA3F2G(3)2						0.12	9.14	0.07	FA3F2G2				0.07	FA3F2G2				0.07	FA3F2G2				0.07	FA3F2G2		0.12	9.17	0.12	FA3F2G2
33	0.8	9.21	0.03	FA2F1G2S(6)1						0.09	9.18	0.03	FA2F1G2S(6)1		0.1	9.21
			0.03	FA3F2G2S(3)1								0.03	FA3F2G2S(6)1									0.48	A4BG(3)4GlcNAc1
			0.1	A4G4								0.03	A4G4				0.1	A4G(3)4				0.1	A4G(3)4
34	0.44	9.32	0.1025	A2G2S(6)2		0.6	9.09			0.6	9.26	0.1025	A2G2S(6)2		0.47	9.25				0.83	9.27	0.55	A4G(3)3GlcNAc2		0.55	9.09				0.46	9.26
			0.235	FA2BF2G2								0.235	FA2BF2G2				0.235	FA2BF2G2				0.14	FA2BF2G2				0.14	FA2BF2G2				0.46	FA2BF2G2
																	0.24	*A4G(3)3				0.14	A4G(3)3
			0.1025	A3BG3S(6)1								0.2625	A3BG3S(6)1									0.37	FA2F3G(3)2GlcNAc1
35	0.62	9.43	0.0325	A3F2G2S(6)1		1.02	9.2			0.13	9.32	0.0325	A3F2G2S(6)1		0.31	9.4				0.18	9.36				0.07	9.17				0.06	9.41
			0.0325	FA2F2G2S(6)1								0.0325	FA2F2G2S(6)1
			0.245	*FA2G2S(3)2								0.0325	FA2G2S(6)2
			0.31	A3G2Lac2								0.31	A3G2Lac2				0.31	A3G(4)2Lac2		0.16	9.41
36	3.19	9.54	0.32	FA2F1G2S(6)1		2.09	9.39			5.53	9.47	0.32	FA2F1G2S(6)1		2.23	9.49				3.59	9.5				3.52	9.31				3.1	9.48
			0.32	A3G3S(6)1								0.32	A3G3S(6)1
			0.01	A3F1G3S(6)1								0.01	A3F1G3S(6)1
			0.07	FA3BF2G3								0.07	FA3BF2G3				0.07	FA3BF2G3				0.07	FA3BF2G3
			3.39	M9								4.5325	M9				3.01	M9				3.49	M9				2.42	M9				2	M9
37	2.33	9.63	0.423333	FA2F1G2S(6)1		0.67	9.48			0.83	9.53	0.423333	FA2F1G2S(6)1		0.28	9.6				0.29	9.67				0.07	9.46				0.09	9.64
			0.423333	FA2BG2S(6)2								0.423333	FA2BG2S(6)2
			0.14	FA2BF3G2								0.14	FA2BF3G2				0.14	FA2BF3G2				0.14	FA2BF3G2				0.08	FA2BF3G2				0.01	FA2BF3G2
			0.423333	FA3G3S(6)1								0.583333	FA3G3S(6)1
										0.44	9.69				0.71	9.73				0.46	9.85				0.08	9.56	1.1	FA2F3G2GlcNAc1		0.05	9.73	1.1	FA2F3G2GlcNAc1
38	0.63	9.89				0.65	9.63			0.82	9.83				0.58	9.86									0.28	9.66				0.05	9.8
			0.63	*A2G2S(6)2								0.52	A2G2S(6)2				0.58	A4BG(3)4Lac1												0.23	9.85
										0.52	9.92
39	0.77	10.1				1.2	9.85			1.76	10.06	0.58	FA2F3G2Lac1		1.1	10.05	1.1	*FA2F3G(3)2Lac1		0.73	10.06	0.73	FA2F3G(3)2Lac1		0.04	9.77				0.19	10.06
			0.77	*A2BG2S(6)2								1.18	A2BG2S(6)2
																									0.18	9.85
40	1.34	10.21	0.85	*A2F1G2S(6)2		0.85	9.94			1.4	10.17	0.46	A2F1G2S(6)2		1.2	10.18				0.74	10.21				0.06	9.94				0.04	10.15
			0.18	FA2G2S(6)2								0.18	FA2G2S(6)2
												0.45	FA3F1G3				0.45	FA3F1G3				0.45	FA3F1G3							0.24	10.24
			0.01	A3F1G3S(6)1								0.01	A3F1G3S(6)1
			0.01	A4G3S(6)1								0.01	A4G3S(6)1
			0.215	FA4G4								0.215	FA4G4				0.215	FA4G(3)4				0.215	FA4G(3)4
			0.075	A4BG4		0.62	10.05			0.18	10.31	0.075	A4BG4				0.075	A4BG(3)4				0.075	A4BG(3)4		0.22	10.05
																						0.29	FA4BF4G2				0.22	FA4BF4G2		0.01	10.33	0.25	FA4BF4G2
																														0.03	10.39
																														0.03	10.45
41	1.1	10.74	0.55	FA3G3S(3,6)2		0.32	10.22			0.1	10.4	0.14	FA3G3S(6)2		0.42	10.46				0.07	10.36
												0.1	A3F3G3				0.42	A3F3G3				0.33	A3F3G3
			0.55	*A3F2G3S(6)1						0.14	10.41	0.65	A3F2G3S(6)1							0.22	10.43
										0.07	10.5
						1.05	10.48			0.18	10.57
										0.06	10.61				1.42	10.56				0.33	10.58
										0.65	10.7
42	0.56	10.89				0.88	10.64			0.33	10.79
			0.1	*A3G3S(3)3								0.0366667	A3G3S(6)3							0.32	10.86
			0.1	*A3F3G3S(3)1								0.0366667	A3F3G3S(6)1
			0.1	*FA3BG3S(3)2						0.04	10.91	0.0366667	FA3BG3S(6)2
			0.26	A4BG4Lac1S(6)1								0.26	A4BG4Lac1S(6)1
43	1.73	11.17	1.61	*FA2F3G2Lac1S(3)1		1.37	10.92			0.06	10.98	0.52	FA2F3G2Lac1S(6)1		0.49	11.13
			0.06	A3F1G3S(6)2						0.04	11.02	0.06	A3F1G3S(6)2
			0.06	*A3F2G2S(6)2						0.07	11.06	0.04	A3F2G2S(6)2
										0.45	11.15
44	0.62	11.43	0.62	A4G4Lac2		0.72	11.17			0.12	11.28	0.71	A4G4Lac2		0.96	11.33	0.69	A4G(4)4Lac2
										0.59	11.37
45	1.72	11.57	1.14	A3G3S(3)3		1.29	11.31			0.44	11.48
			0.01	FA3F1G3S(3)2
			0.57	FA4BF4G4								0.44	FA4BF4G4				0.7	FA4BF4G4
46	1.57	11.98	0.28	A3G3Lac3		1.59	11.81			0.02	11.67	0.06	A3G3Lac3				0.06	A3G(4)3Lac3
										0.04	11.71
			1.28	A3G3S(3)4						0.01	11.77
			0.01	A4G4Lac2S(3)1
47	0.45	12.36	0.45	FA3F1G3S(3)3		1.12	12.33
48	0.37	12.51
49	0.33	12.8
50	0.4	13.21				0.54	12.79
Sum	99.99		98.38			100				100.01		98.46			100.01		98.355			100		101.637			99.97		97.89			99.98		97.16
*=Major link
