# Supplementary figures and images for: N -Linked glycosylation profiles of therapeutic induced senescent (TIS) triple negative breast cancer cells (TNBC) and their extracellular vesicle (EV) progeny
Source: Royal Society of Chemistry journal article supplement (doi:10.1039/d0mo00017e), 2020-12-16

Figure S1. A

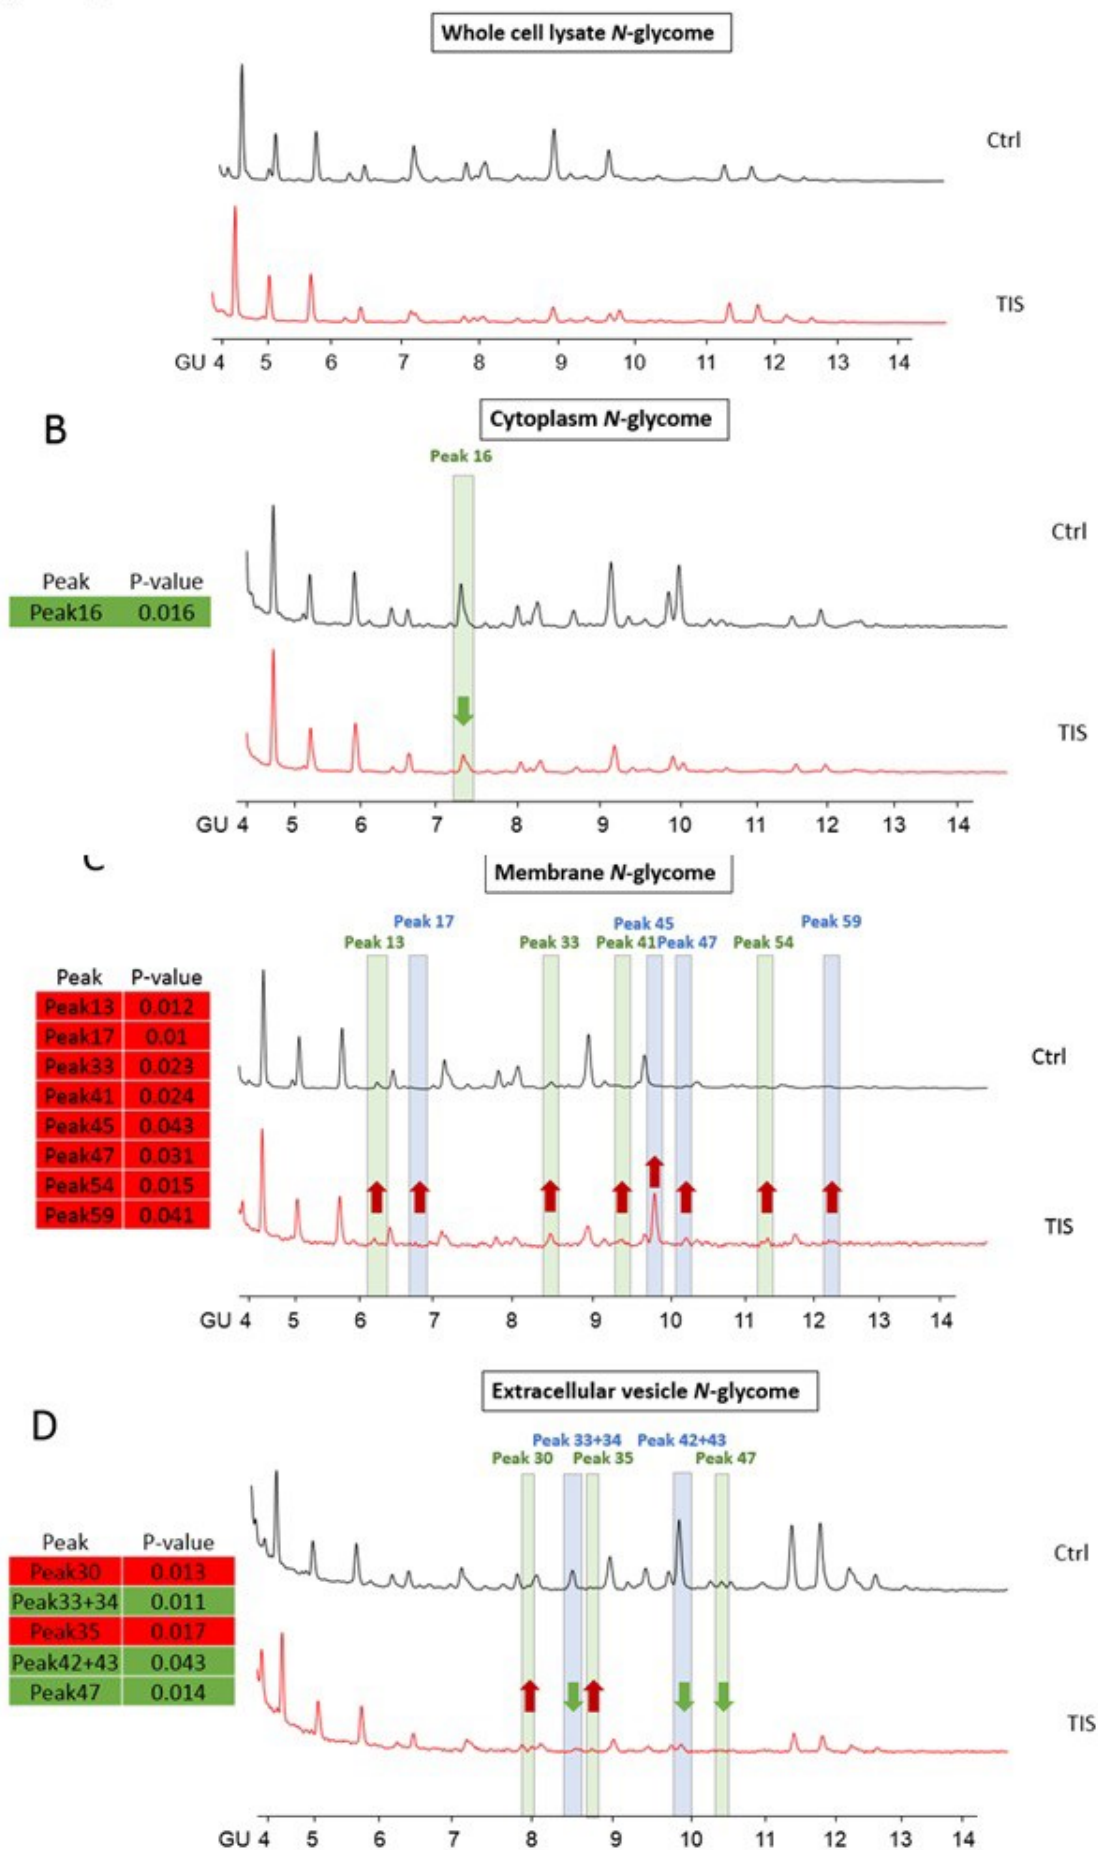

Supplement: d0mo00017e1.pdf [file d0mo00017e1.pdf]

Figure S3.

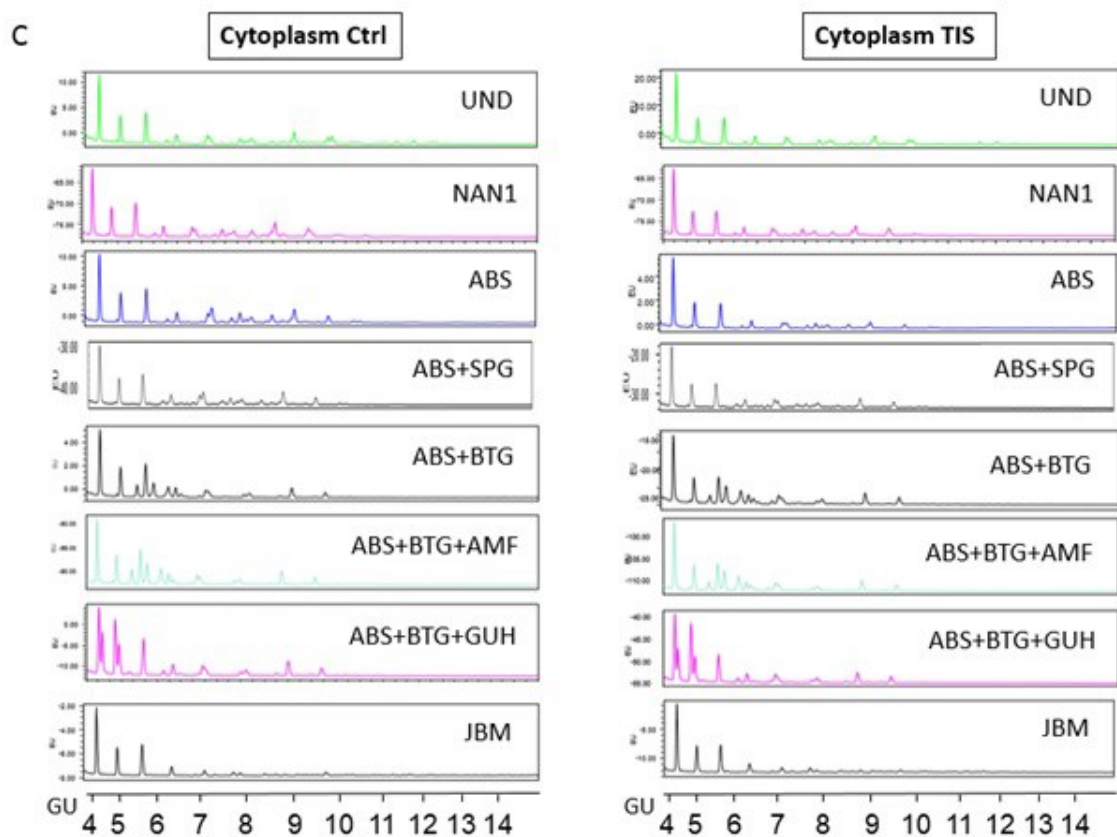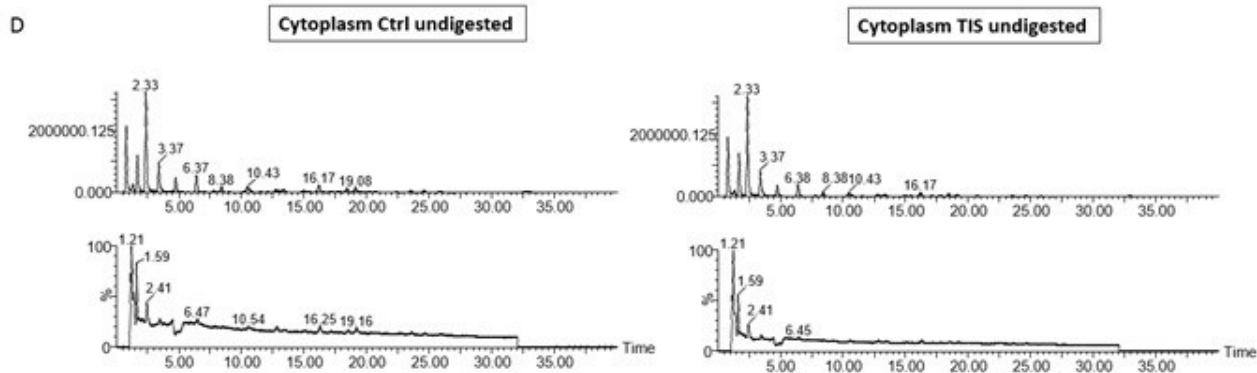

Supplement: d0mo00017e4.pdf [file d0mo00017e4.pdf]

Figure S3.

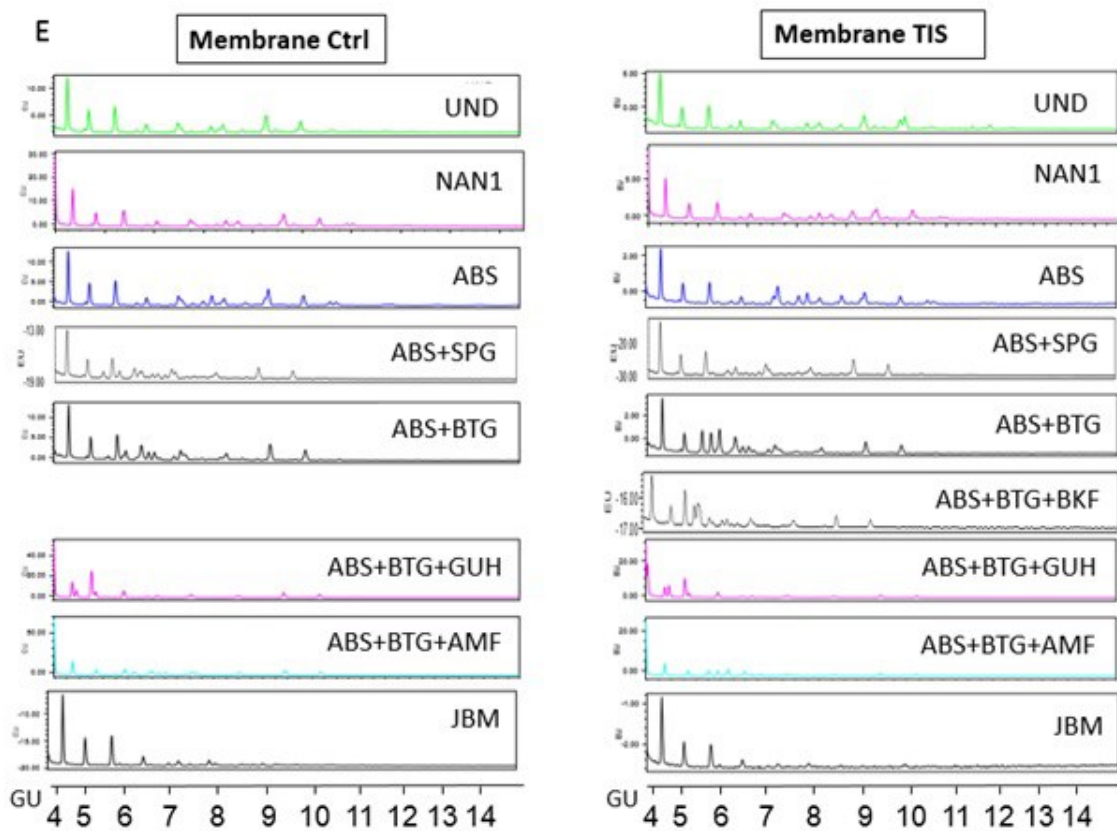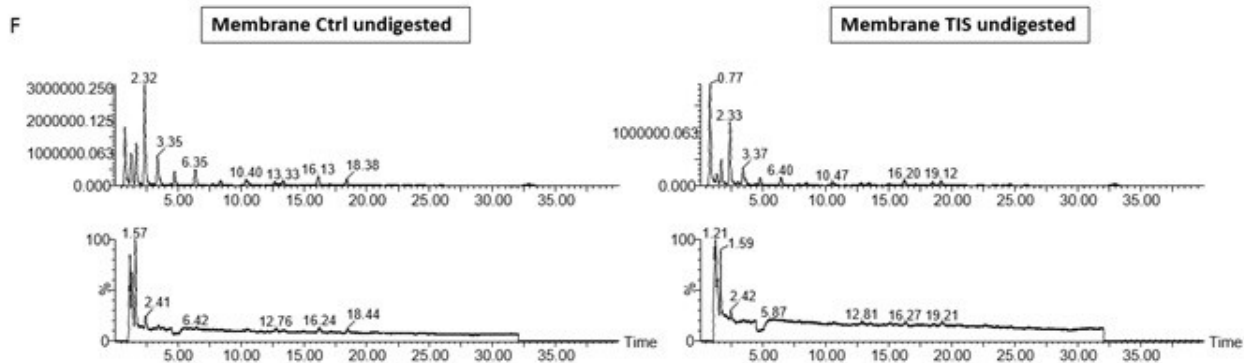

Supplement: d0mo00017e5.pdf [file d0mo00017e5.pdf]
